# Supplementary material for: Regioselective synthesis of functionalized dihydroisoquinolines from o-alkynylarylaldimines via the Reformatsky reaction
Source: Royal Society of Chemistry journal article supplement (doi:10.1039/c6ob01790h), 2016-01-01

Supporting Information

**Regioselective synthesis of functionalized dihydroisoquinolines  
from *o*-alkynylarylaldimines via Reformatsky Reaction**

Tohasib Yusub Chaudhari,<sup>b</sup> Urvashi,<sup>a</sup> Sandeep K. Ginotra,<sup>c</sup> Pooja Yadav,<sup>a</sup> Gulshan Kumar,<sup>a</sup>  
Vibha Tandon\*<sup>a,b</sup>

<sup>a</sup> *Department of Chemistry, University of Delhi, New Delhi-110007.*

<sup>b</sup> *Special Centre for Molecular Medicine, Jawahar Lal Nehru University, New Delhi-110067.*

<sup>c</sup> *Syngene International Ltd, Biocon Park, Plot # 2 & 3, Phase IV, Bommasandra, Jigani Link Road, Bengaluru, Karnataka-560099, India.*

| <b>S. No.</b> | <b>Index</b>                                                                                   | <b>Page no.</b> |
|---------------|------------------------------------------------------------------------------------------------|-----------------|
| 1.            | X-ray Crystal Structure and data of <b>3a</b> and <b>3m</b>                                    | S1-S6           |
| 2.            | <sup>1</sup> H, <sup>13</sup> C NMR and HRMS spectra of compounds <b>1a-1n</b>                 | S7-S34          |
| 3.            | <sup>1</sup> H, <sup>13</sup> C NMR and HRMS spectra of <b>3a-3zc</b> , <b>4a</b> and <b>5</b> | S35-S96         |
| 4.            | Spectra of Mechanistic Experiments                                                             | S97-S102        |

## 1. X-ray crystal structure

### 1.1 X-ray crystal structure data of (3a)

The single crystal X-ray data <sup>[S1]</sup> of the given compound was collected on an Oxford Xcalibur CCD diffractometer using graphite monochromated MoK  $\alpha$ -radiation ( $\lambda = 0.71073\text{\AA}$ ) at 293(2) K. The multi-scan correction was applied to it. The structure was solved by the direct method using SIR-92 and refined by full matrix least-square refinement technique on  $F^2$  using SHELXL97.<sup>2</sup> The hydrogen atoms were placed into the calculated position and included in the last cycle of the refinement. All the calculations were done using Win GX software package.<sup>3</sup> The main crystallographic data and structural refinement details of **3a** and **3m** are given in Table S1 & S2 respectively. Atomic coordinates, bond lengths, bond angles, and thermal parameters for compound **3a** and **3m** have been deposited at the Cambridge Crystallographic Data Centre (CCDC, deposit no.1062612 and 1420734)

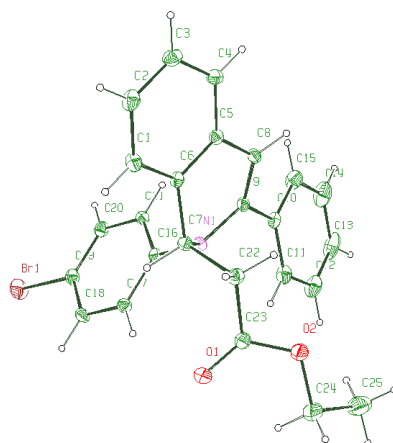

**Fig. 1s.** X-ray crystallographic ORTEP diagram of compound **3a**

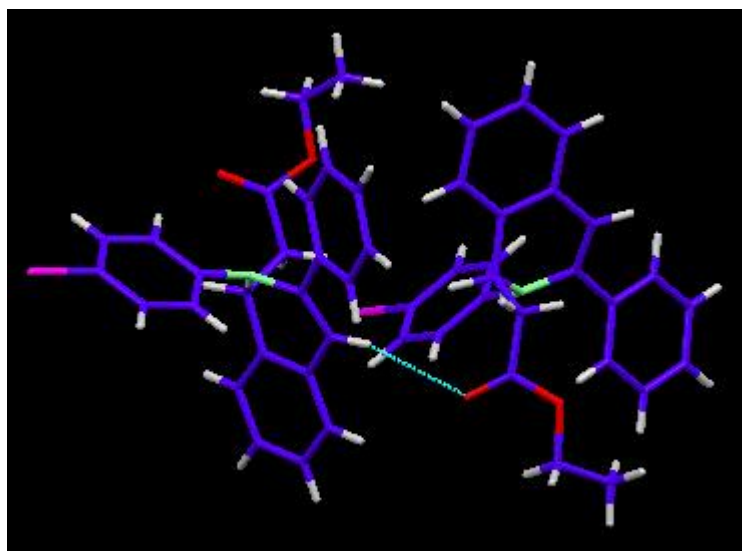

**Fig. 2s.** Hydrogen bonding in the crystal lattice of (**3a**).

**Table S1. Crystal data and structure refinement for 3a.**

|                                            |                                                                               |
|--------------------------------------------|-------------------------------------------------------------------------------|
| Empirical Formula                          | C <sub>25</sub> H <sub>22</sub> Br <sub>1</sub> N <sub>1</sub> O <sub>2</sub> |
| Formula Weight                             | 448.35                                                                        |
| Temperature                                | 293(2) K                                                                      |
| Wavelength                                 | 0.71073Å                                                                      |
| Crystal system                             | Monoclinic                                                                    |
| Space group                                | <i>I</i> 2/ <i>a</i>                                                          |
| a [Å]                                      | 20.6230(12)                                                                   |
| b [Å]                                      | 11.9083(4)                                                                    |
| c [Å]                                      | 17.8031(7)                                                                    |
| $\alpha$ [°]                               | 90.00                                                                         |
| $\beta$ [°]                                | 97.506                                                                        |
| $\lambda$ [°]                              | 90.00                                                                         |
| Volume [Å <sup>3</sup> ]                   | 4334.7(3)                                                                     |
| Z                                          | 8                                                                             |
| Density (calculated) [Mg/m <sup>3</sup> ]  | 1.374                                                                         |
| Absorption coefficient [mm <sup>-1</sup> ] | 1.917                                                                         |
| F(000)                                     | 1840                                                                          |
| Crystal size [mm <sup>3</sup> ]            | 0.05 x 0.04 x 0.02                                                            |
| Theta range for data collection [°]        | 2.94 to 25.00                                                                 |
| Index ranges                               | -24 ≤ h ≤ 24, -14 ≤ k ≤ 12, -21 ≤ l ≤ 21                                      |
| Reflections collected / unique             | 16314 / 3823                                                                  |

|                                                |                                                               |
|------------------------------------------------|---------------------------------------------------------------|
|                                                |                                                               |
| R(int)                                         | 0.0584                                                        |
| Completeness of Theta at 25 °C (%)             | 99.8                                                          |
| Absorption Correction                          | Semi-empirical from equivalents                               |
| Max. and Min. transmission                     | 25.00 and 3.00                                                |
| Refinement method                              | Full-matrix least square on F <sup>2</sup>                    |
| Data/ restraints/ parameters                   | 3823/0/266                                                    |
| Goodness-of-fit on F <sup>2</sup>              | 1.035                                                         |
| Final R indices [I>2sigma (I)] <sup>a,b</sup>  | R <sub>1</sub> = 0.0669, <sup>w</sup> R <sub>2</sub> = 0.1346 |
| R indices (all data)                           | R <sub>1</sub> = 0.1130, <sup>w</sup> R <sub>2</sub> = 0.1536 |
| Largest diff. peak and hole [Å <sup>-3</sup> ] | 0.456 and -0.333 e.Å <sup>-3</sup>                            |

$${}^a R = \sum(|F_o| - |F_c|) / \sum |F_o| ; {}^b R_w = \{ \sum [w(F_o^2 - F_c^2)^2] / \sum [w(F_o^2)^2] \}^{1/2}$$

## 1.2 X-ray crystal structure data (3m)

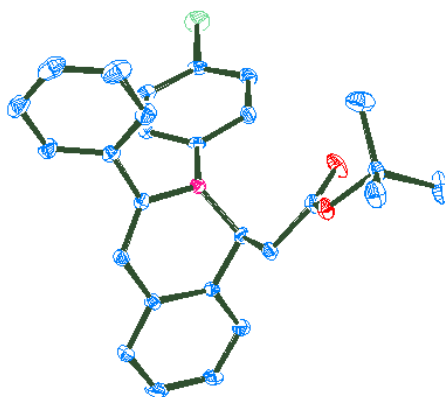

**Fig. 3s.** X-ray crystallographic ORTEP diagram of compound **3m**

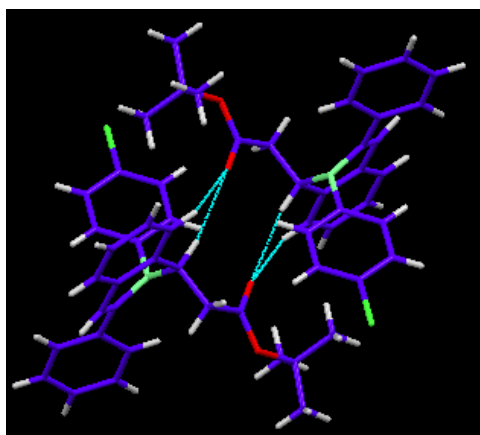

**Fig. 4s.** Hydrogen bonding in the crystal lattice of (**3m**).

**Table S2.** Crystal data and structure refinement for (**3m**).

|                          |                          |
|--------------------------|--------------------------|
| Empirical Formula        | $C_{27}H_{26}Cl_1N_1O_2$ |
| Formula Weight           | 431.94                   |
| Temperature              | 293(2) K                 |
| Wavelength               | 0.71073 Å                |
| Crystal system           | Triclinic                |
| Space group              | <i>P</i> - 1             |
| a [Å]                    | 11.187(5)                |
| b [Å]                    | 19.602(5)                |
| c [Å]                    | 21.429(5)                |
| $\alpha$ [°]             | 89.988(5)                |
| $\beta$ [°]              | 89.828(5)                |
| $\lambda$ [°]            | 90.021(5)                |
| Volume [Å <sup>3</sup> ] | 4699 (3)                 |
| Z                        | 8                        |

|                                                 |                                                               |
|-------------------------------------------------|---------------------------------------------------------------|
| Density (calculated) [Mg/m <sup>3</sup> ]       | 1.221                                                         |
| Absorption coefficient [mm <sup>-1</sup> ]      | 0.185                                                         |
| F(000)                                          | 1824                                                          |
| Crystal size [mm <sup>3</sup> ]                 | 0.05 x 0.04 x 0.02                                            |
| Theta range for data collection [°]             | 3.04 to 25.00                                                 |
| Index ranges                                    | -13 ≤ h ≤ 13, -23 ≤ k ≤ 23, -16 ≤ l ≤ 25                      |
| Reflections collected / unique                  | 24698 / 13207                                                 |
| R(int)                                          | 0.0252                                                        |
| Completeness of Theta at 25 °C (%)              | 79.7                                                          |
| Absorption Correction                           | Semi-empirical from equivalents                               |
| Refinement method                               | Full-matrix least square on F <sup>2</sup>                    |
| Data/ restraints/ parameters                    | 13207/0/1117                                                  |
| Goodness-of-fit on F <sup>2</sup>               | 0.740                                                         |
| Final R indices [I > 2sigma (I)] <sup>a,b</sup> | R <sub>1</sub> = 0.0596, <sup>w</sup> R <sub>2</sub> = 0.1870 |
| R indices (all data)                            | R <sub>1</sub> = 0.0979, <sup>w</sup> R <sub>2</sub> = 0.2280 |
| Largest diff. peak and hole [Å <sup>-3</sup> ]  | 0.459 and -0.234 e.Å <sup>-3</sup>                            |

$${}^a R = \sum (\|F_o - F_c\|) / \sum |F_o| ; {}^b R_w = \{ \sum [w(F_o^2 - F_c^2)^2] / \sum [w(F_o^2)^2] \}^{1/2}$$

### References:

1. G.M. Sheldrick, *Acta Crystallogr., Sect. A*, **1990**, 46, 467.
2. G.M. Sheldrick, *SHELXL-97, Computer program for crystal structure refinement* University of Göttingen, Germany, **1997**.
3. L. J. Farrugia, WinGX Version 1.80.05, *An integrated system of Windows Programs for the Solution, Refinement and Analysis of Single Crystal X-Ray Diffraction Data*, Department of Chemistry, University of Glasgow (**1997-2009**).

## References

[S1]. CCDC. 1062612 (**3a**) and 1420734 (**3m**) contain the supplementary crystallographic data for this paper. These data can be obtained free of charge from The Cambridge Crystallographic Data Centre via [www.ccdc.cam.ac.uk/data\\_request/cif](http://www.ccdc.cam.ac.uk/data_request/cif).

## 2. $^1\text{H}$ , $^{13}\text{C}$ NMR and HRMS spectra of compounds 1a-1n:

$^1\text{H}$  NMR in  $\text{CDCl}_3$

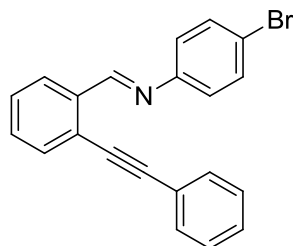

(*E*)-4-Bromo-*N*-(2-(phenylethynyl)benzylidene)aniline (**1a**)

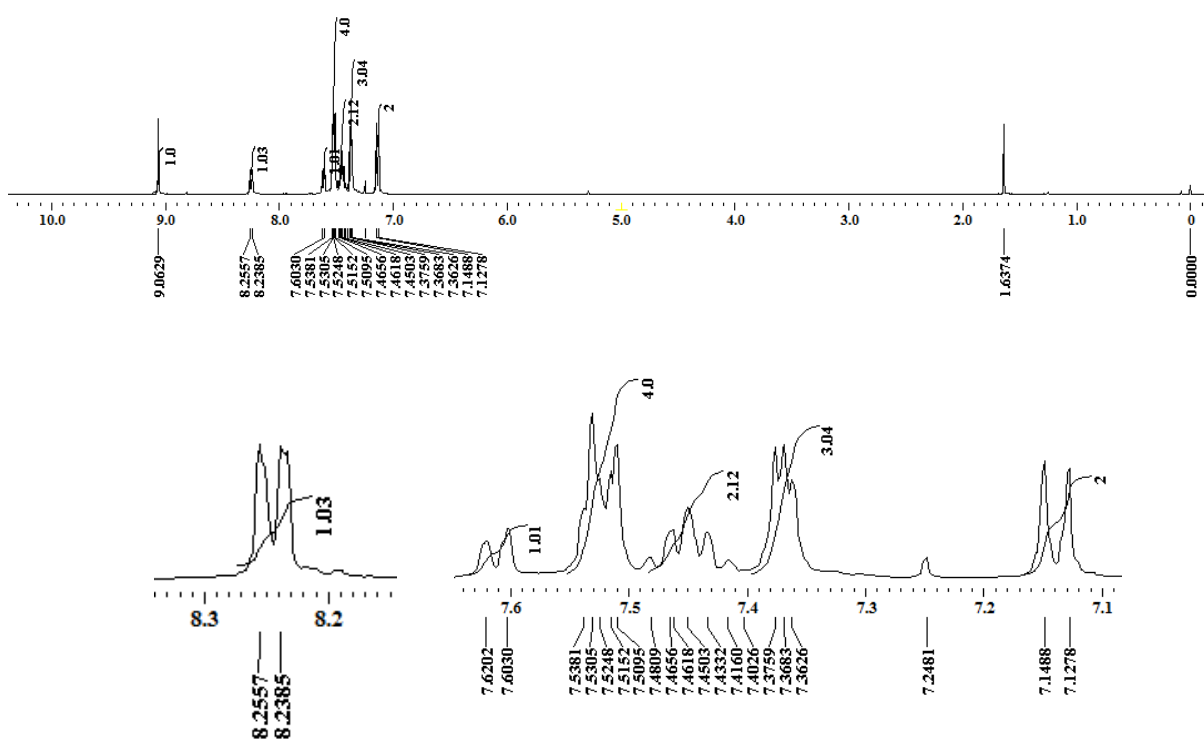

<sup>13</sup>C NMR in CDCl<sub>3</sub>

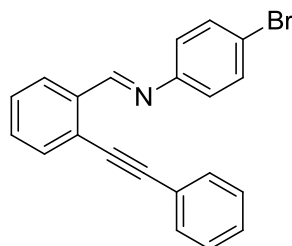

(E)-4-Bromo-N-(2-(phenylethynyl)benzylidene)aniline (**1a**)

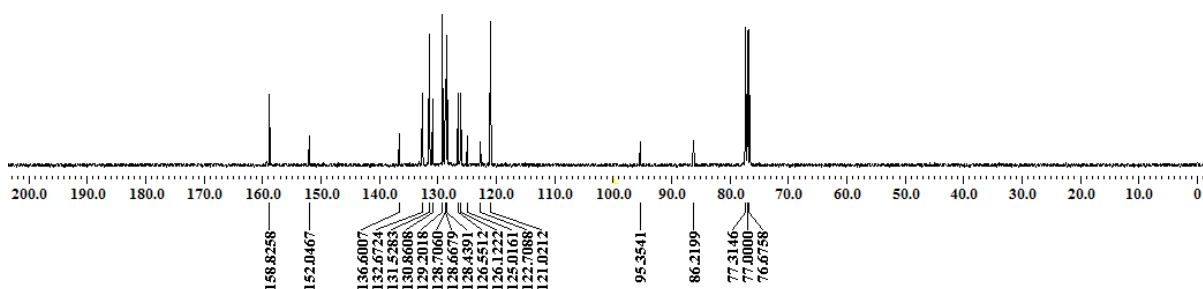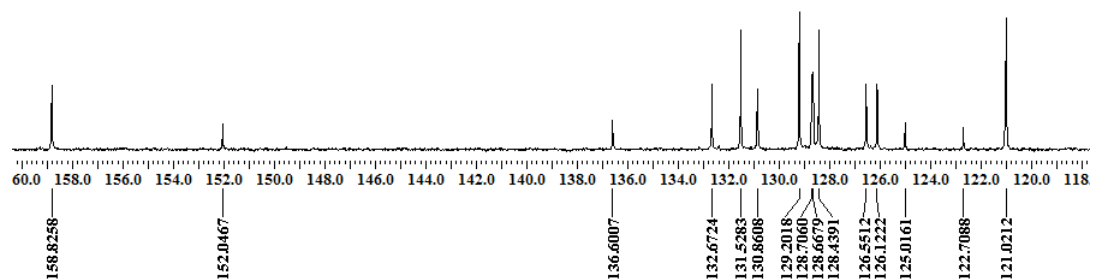

HRMS: (E)-4-Bromo-N-(2-(phenylethynyl)benzylidene)aniline (**1a**)

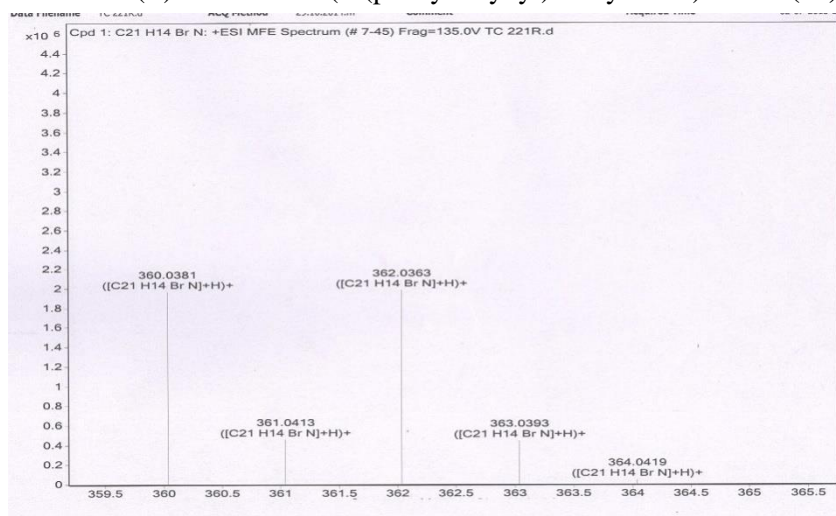



<sup>1</sup>H NMR in CD<sub>3</sub>CN

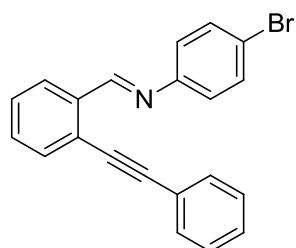

(*E*)-4-bromo-*N*-(2-(phenylethynyl)benzylidene)aniline (**1a**)

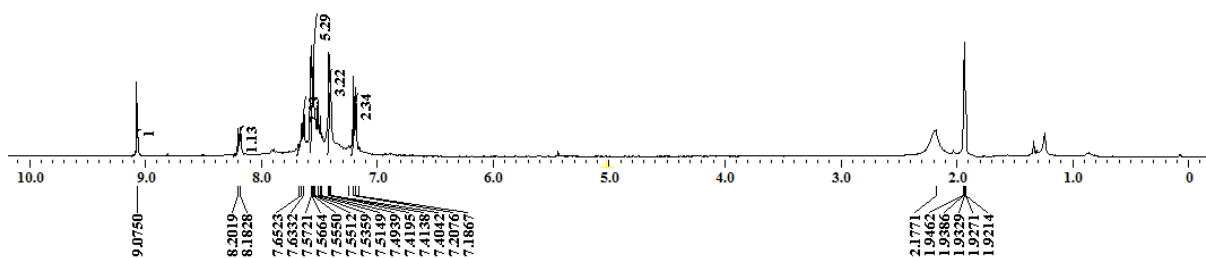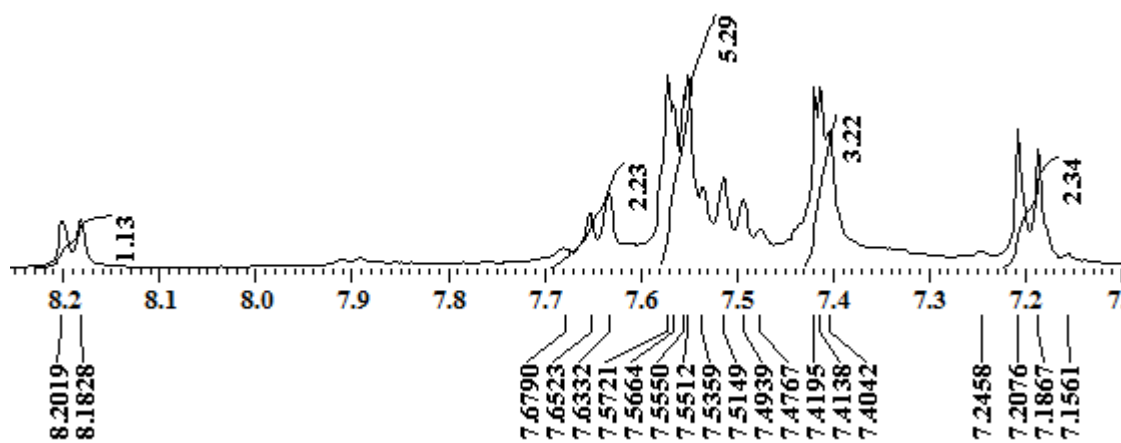

$^{13}\text{C}$  NMR in  $\text{CD}_3\text{CN}$

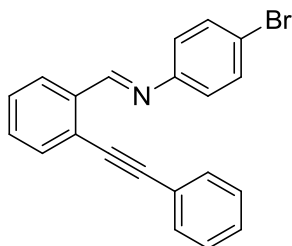

(*E*)-4-bromo-*N*-(2-(phenylethynyl)benzylidene)aniline (**1a**)

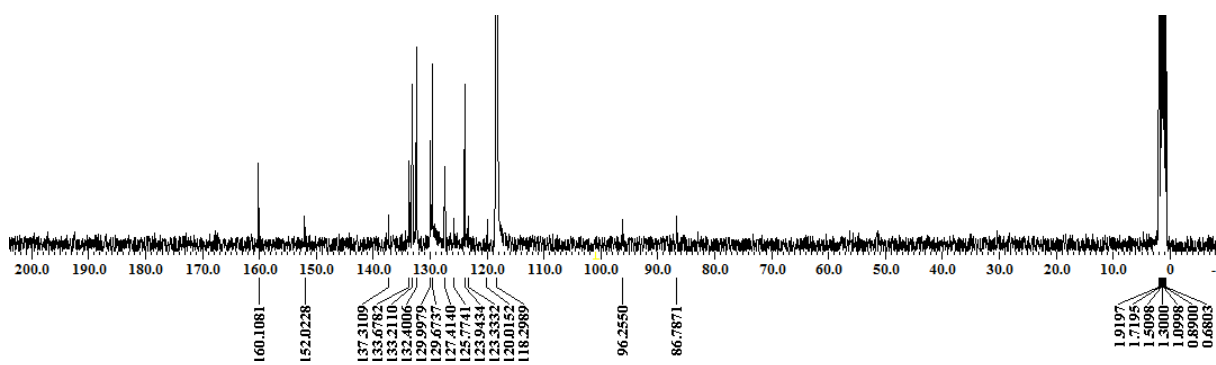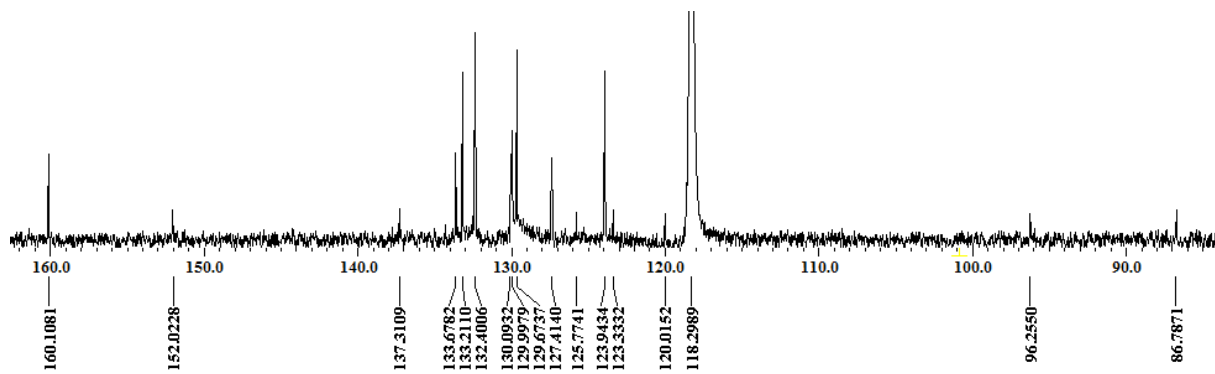

<sup>1</sup>H NMR in CDCl<sub>3</sub>

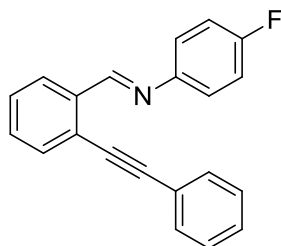

(*E*)-4-Fluoro-*N*-(2-(phenylethynyl)benzylidene)aniline (**1b**)

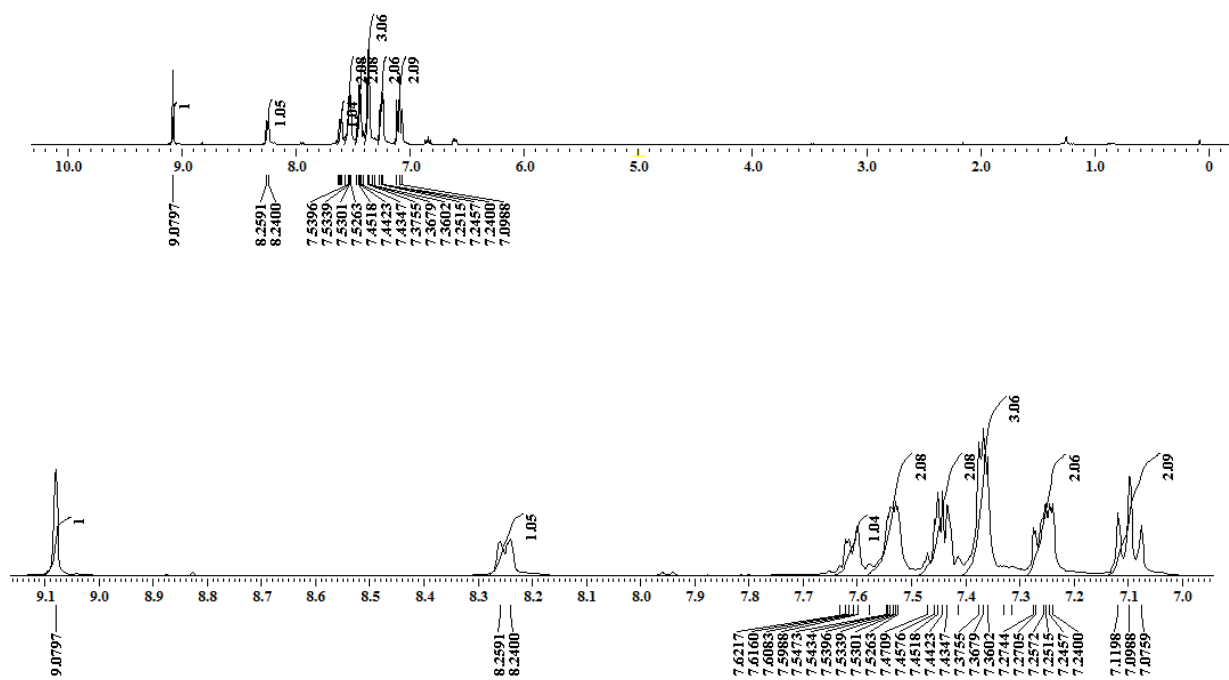

<sup>13</sup>C NMR in CDCl<sub>3</sub>

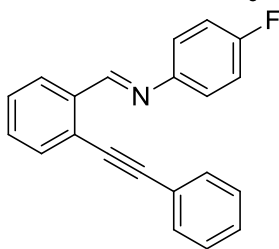

(*E*)-4-Fluoro-*N*-(2-(phenylethynyl)benzylidene)aniline (**1b**)

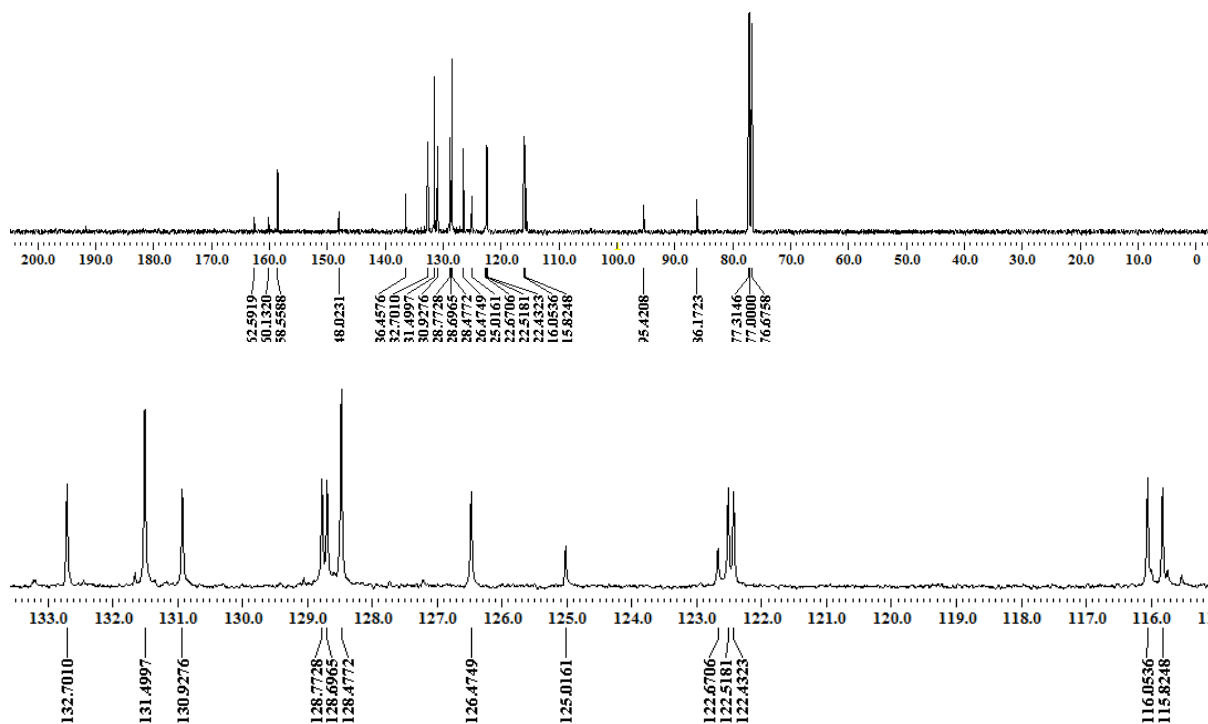

HRMS: (*E*)-4-Fluoro-*N*-(2-(phenylethynyl)benzylidene)aniline (**1b**)

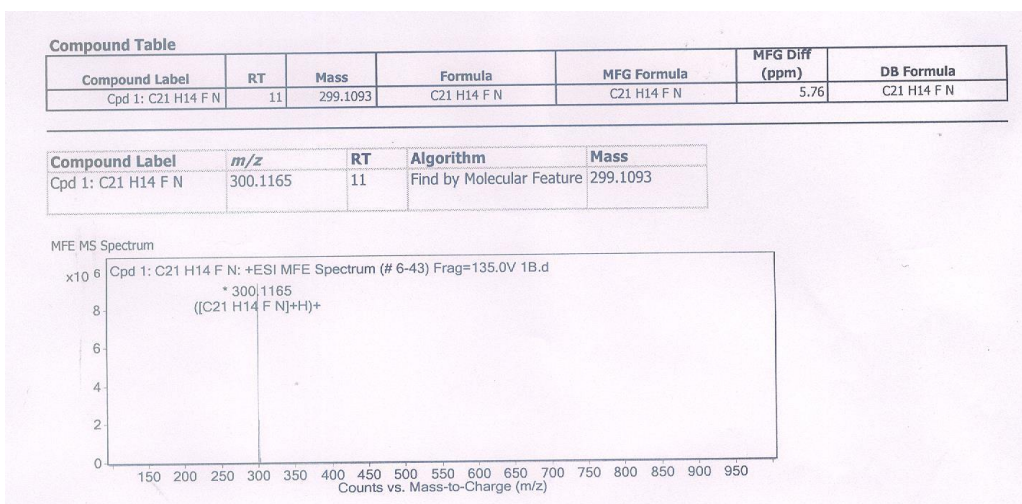

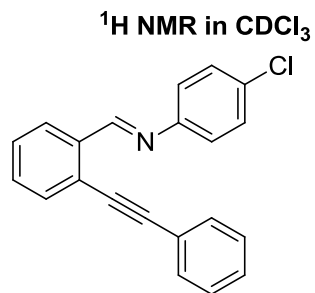

(E)-4-Chloro-N-(2-(phenylethynyl)benzylidene)aniline (**1c**)

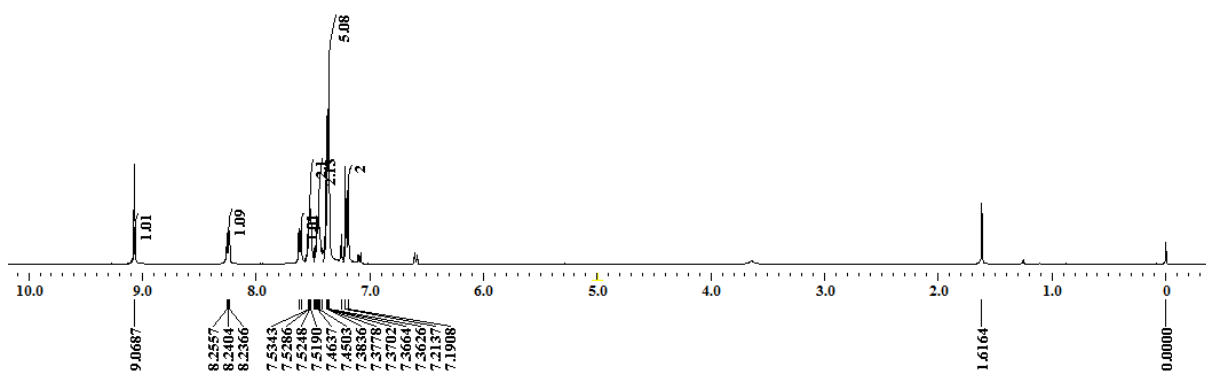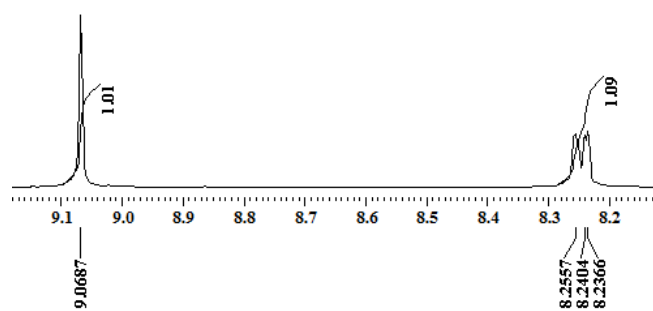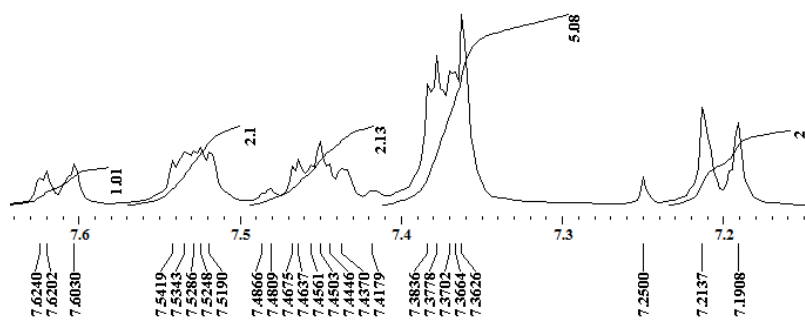

<sup>13</sup>C NMR in CDCl<sub>3</sub>

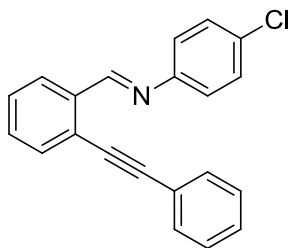

(*E*)-4-Chloro-*N*-(2-(phenylethynyl)benzylidene)aniline (**1c**)

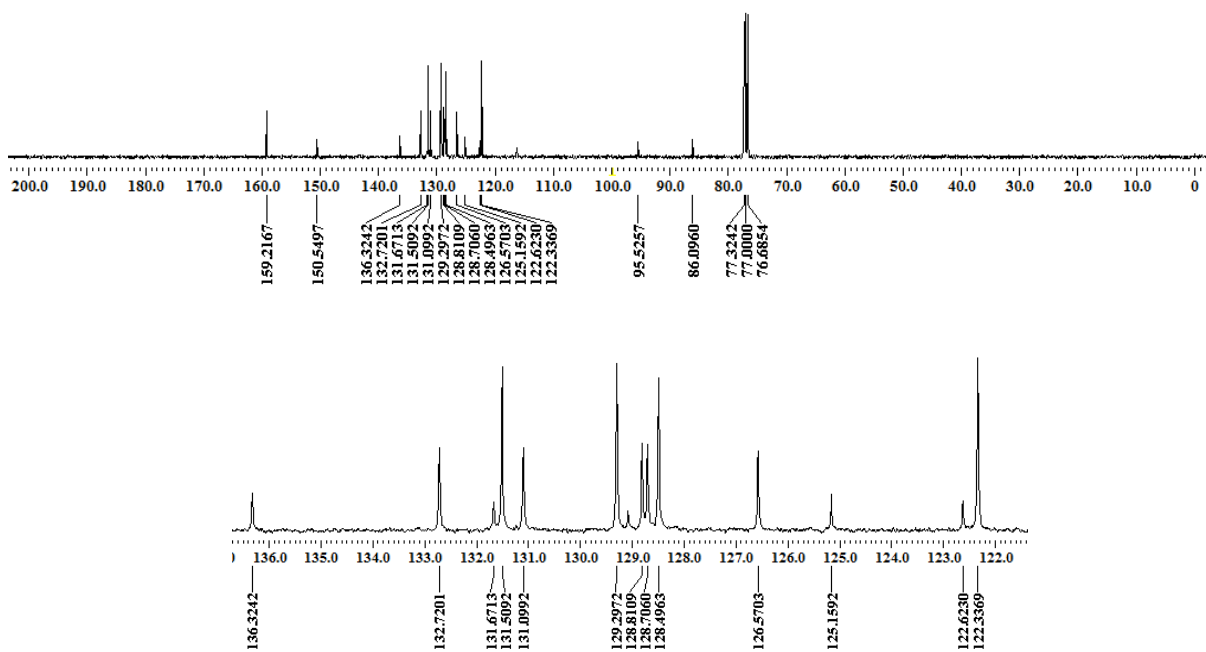

HRMS:(*E*)-4-Chloro-*N*-(2-(phenylethynyl)benzylidene)aniline (**1c**)

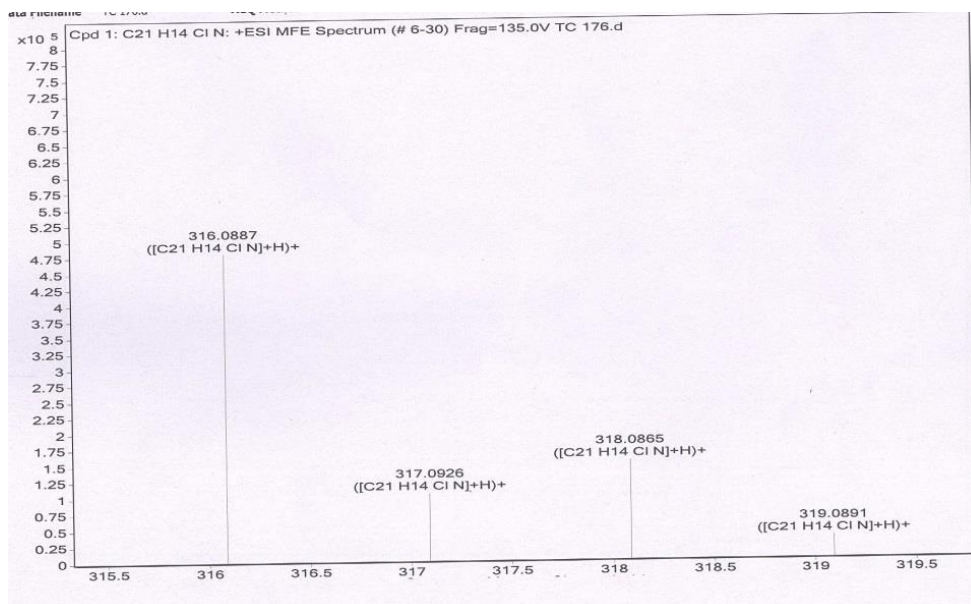

<sup>1</sup>H NMR in CDCl<sub>3</sub>

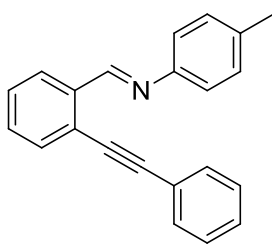

(*E*)-4-Methyl-*N*-(2-(phenylethynyl)benzylidene)aniline (**1d**)

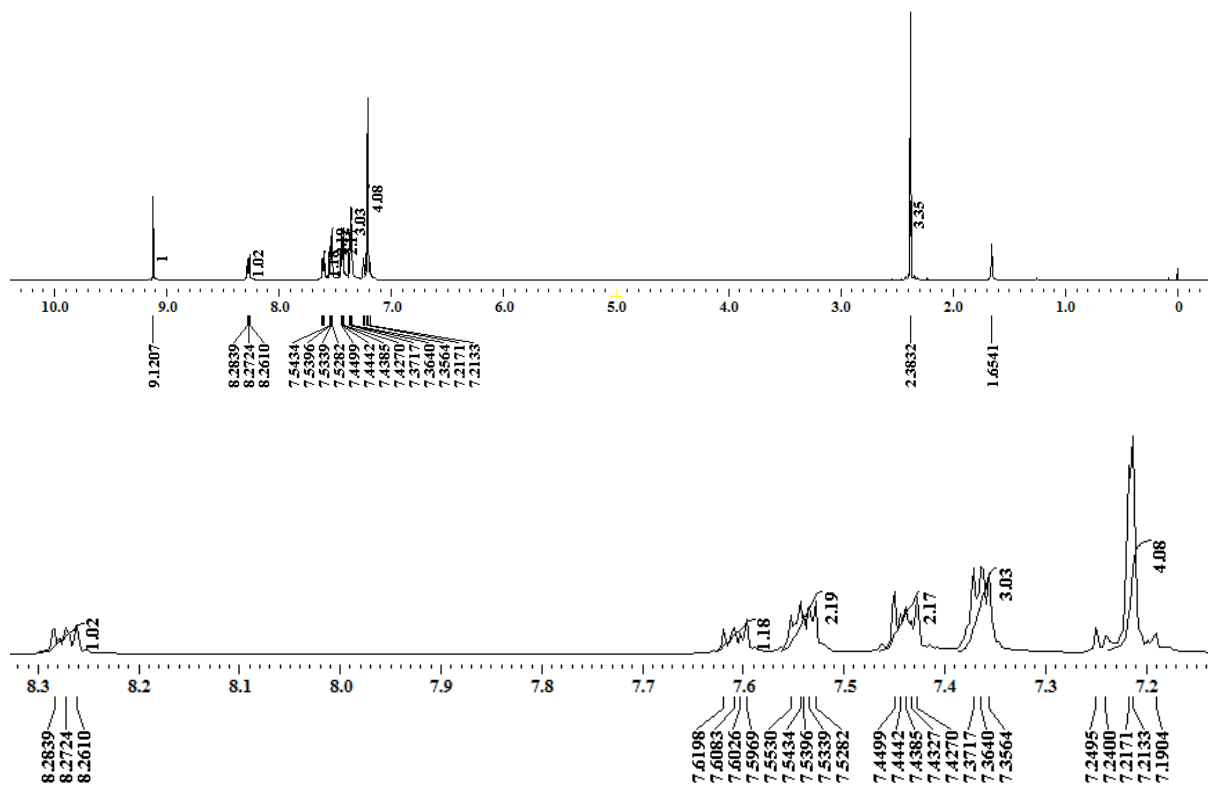

<sup>13</sup>C NMR in CDCl<sub>3</sub>

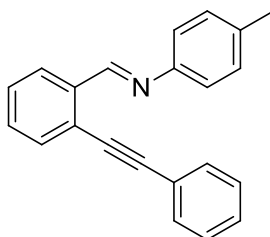

(*E*)-4-Methyl-*N*-(2-(phenylethynyl)benzylidene)aniline (**1d**)

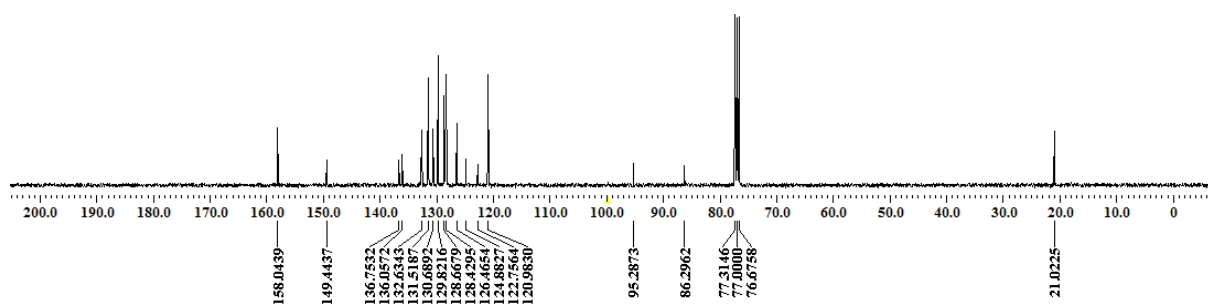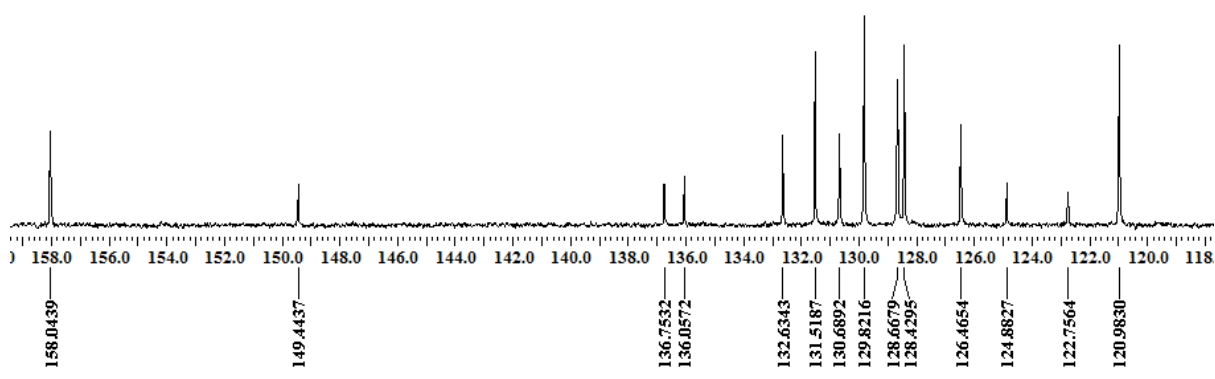

**HRMS:** (*E*)-4-Methyl-*N*-(2-(phenylethynyl)benzylidene)aniline (**1d**)

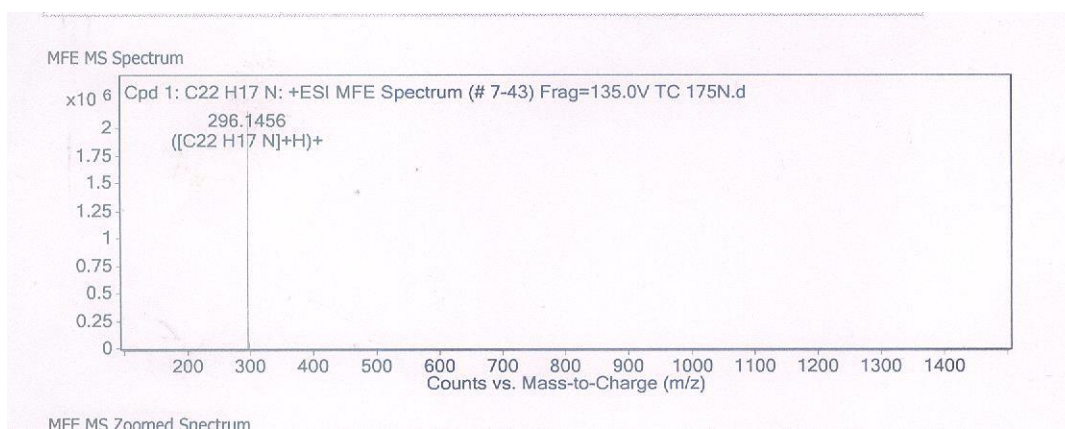



<sup>1</sup>H NMR in CDCl<sub>3</sub>

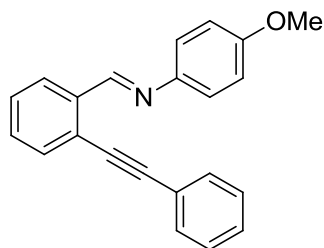

(*E*)-4-Methoxy-*N*-(2-(phenylethynyl)benzylidene)aniline (**1e**)

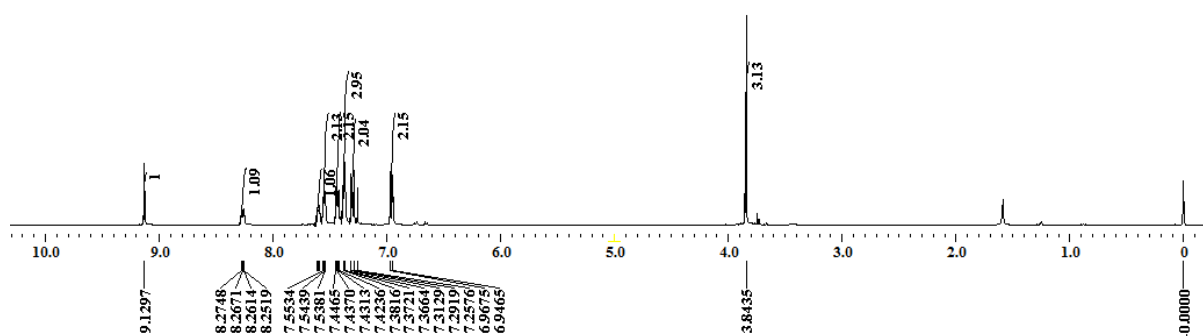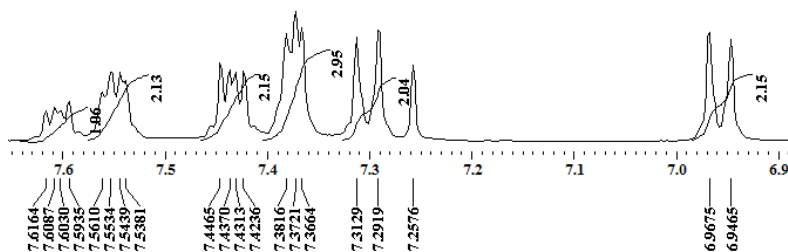

HRMS: (*E*)-4-Methoxy-*N*-(2-(phenylethynyl)benzylidene)aniline (**1e**)

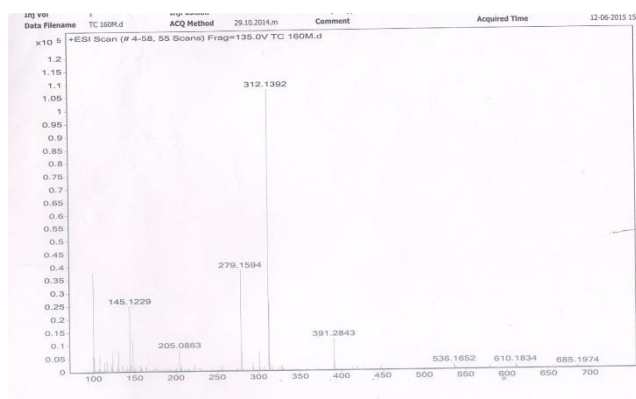

<sup>1</sup>H NMR in CDCl<sub>3</sub>

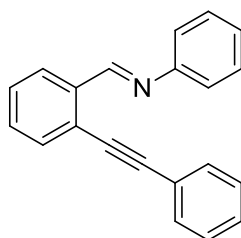

(*E*)-*N*-(2-(phenylethynyl)benzylidene)aniline (**1f**)

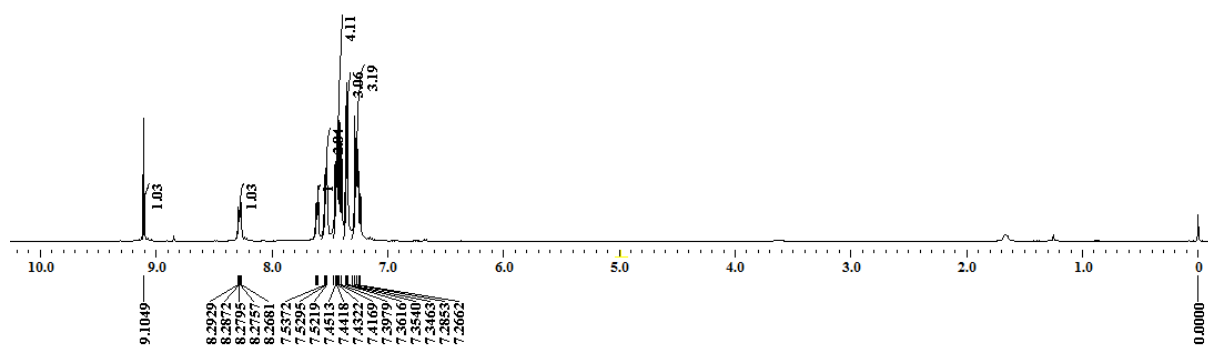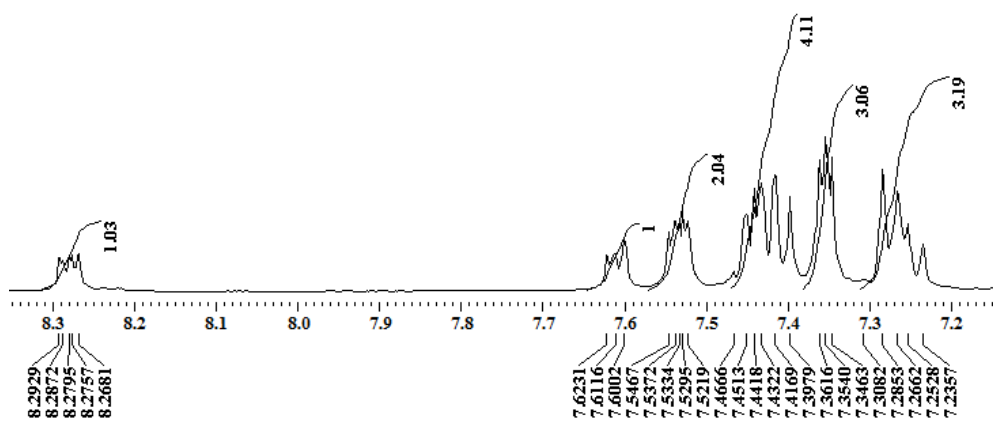

<sup>13</sup>C NMR in CDCl<sub>3</sub>

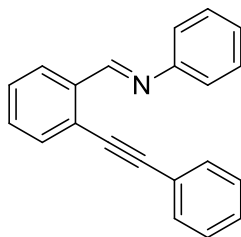

(*E*)-*N*-(2-(phenylethynyl)benzylidene)aniline (**1f**)

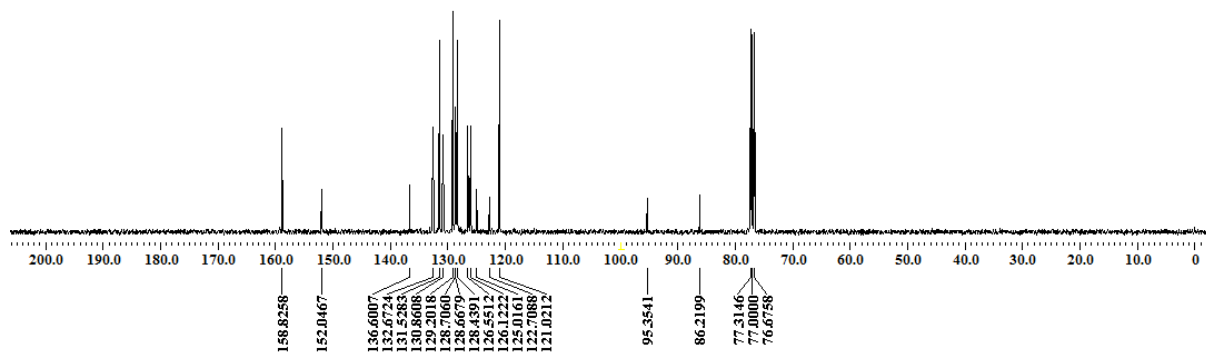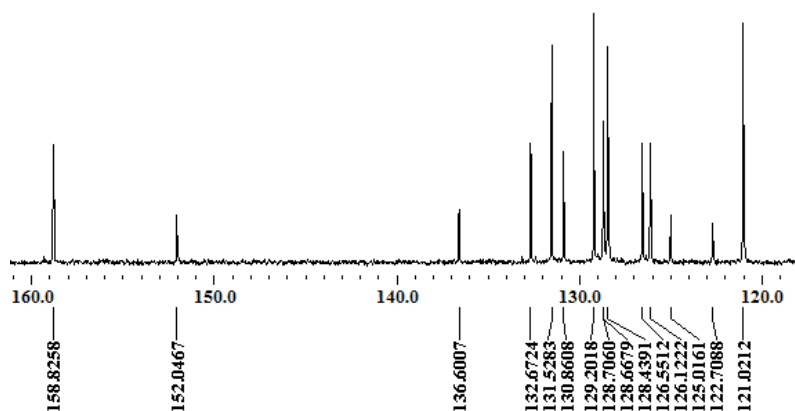

HRMS:(*E*)-*N*-(2-(phenylethynyl)benzylidene)aniline (**1f**)

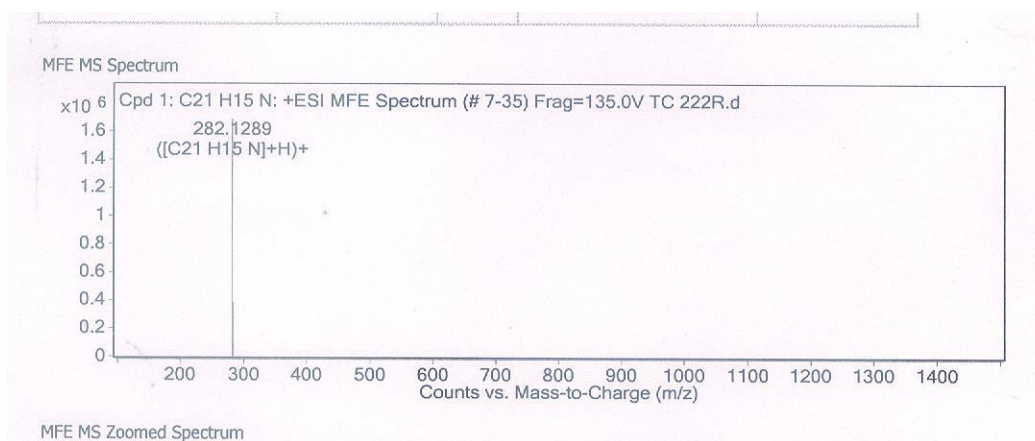

$^1\text{H}$  NMR in  $\text{CDCl}_3$

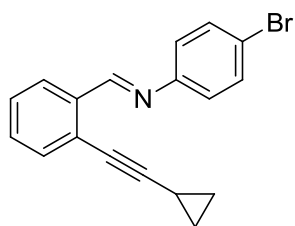

(*E*)-4-bromo-*N*-(2-(cyclopropylethynyl)benzylidene)aniline (**1g**)

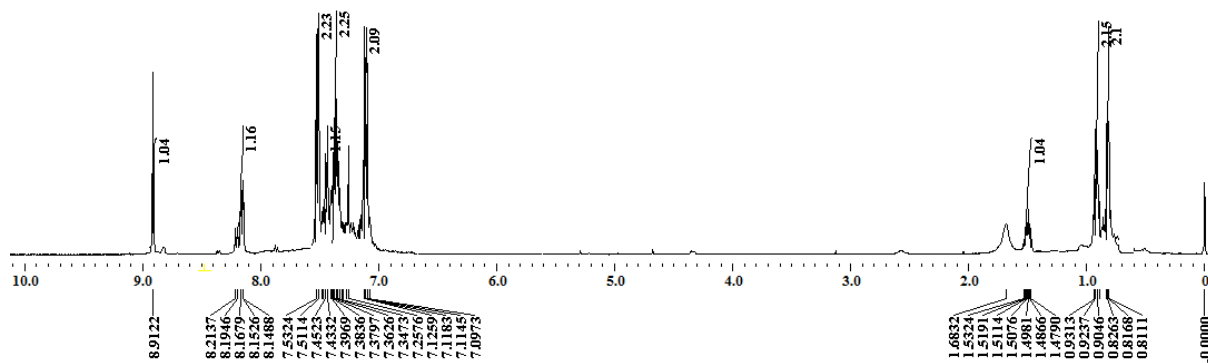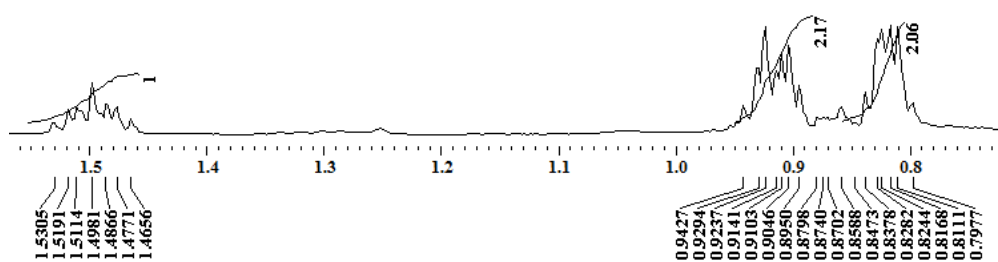

<sup>13</sup>C NMR in CDCl<sub>3</sub>

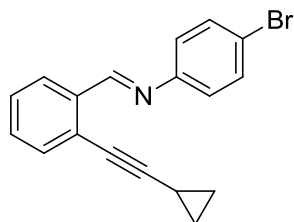

(*E*)-4-Bromo-*N*-(2-(cyclopropylethynyl)benzylidene)aniline (**1g**)

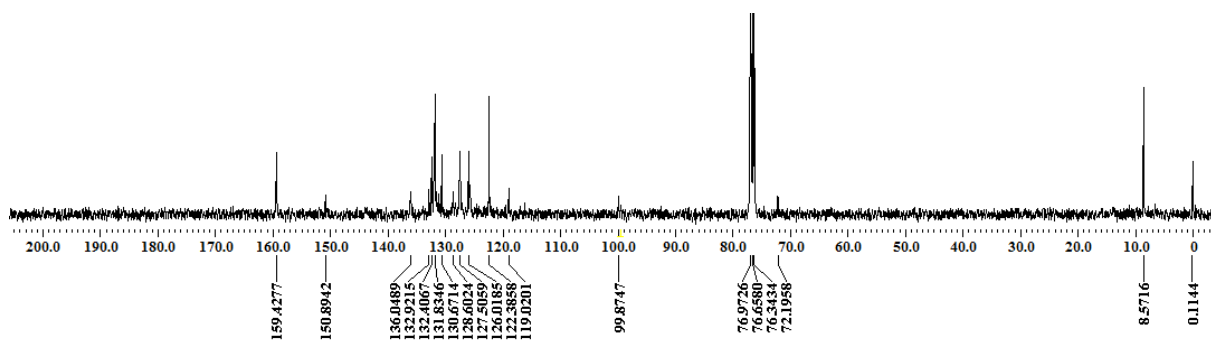

HRMS: (*E*)-4-Bromo-*N*-(2-(cyclopropylethynyl)benzylidene)aniline (**1g**)

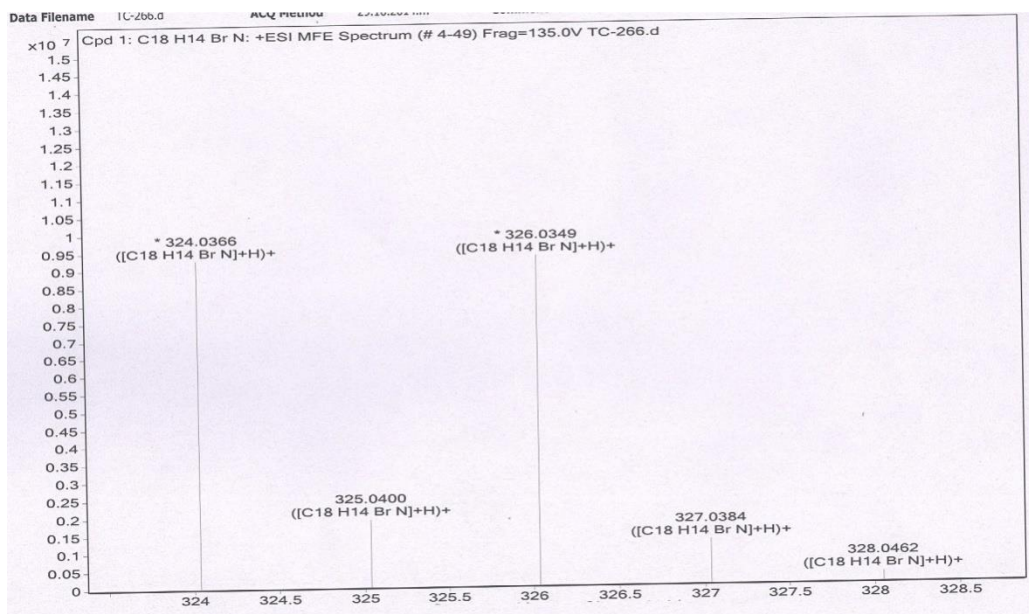

<sup>1</sup>H NMR in CDCl<sub>3</sub>

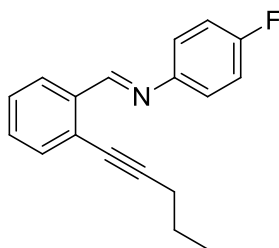

(*E*)-4-Fluoro-*N*-(2-(pent-1-yn-1-yl)benzylidene)aniline (**1h**)

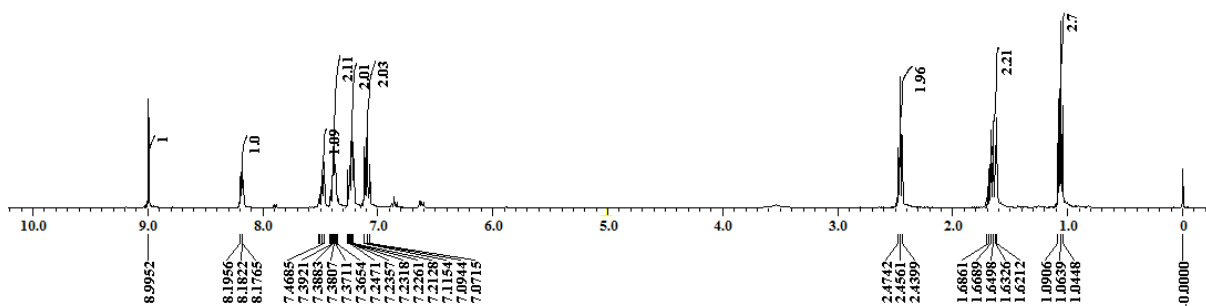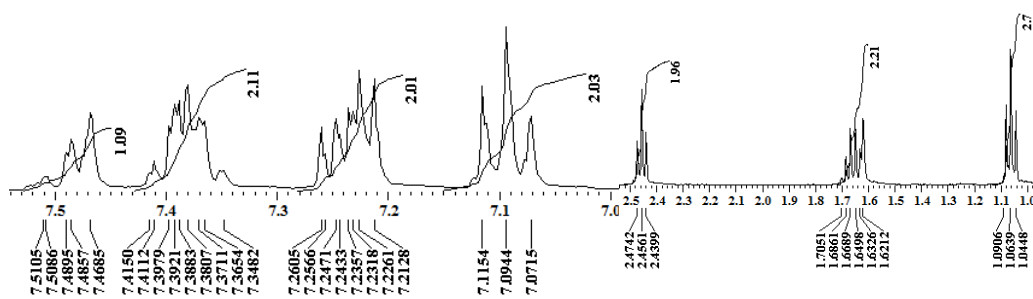

<sup>13</sup>C NMR in CDCl<sub>3</sub>

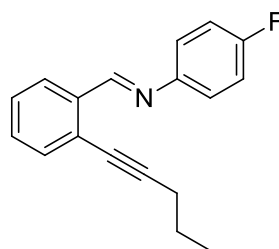

(*E*)-4-Fluoro-*N*-(2-(pent-1-yn-1-yl)benzylidene)aniline (**1h**)

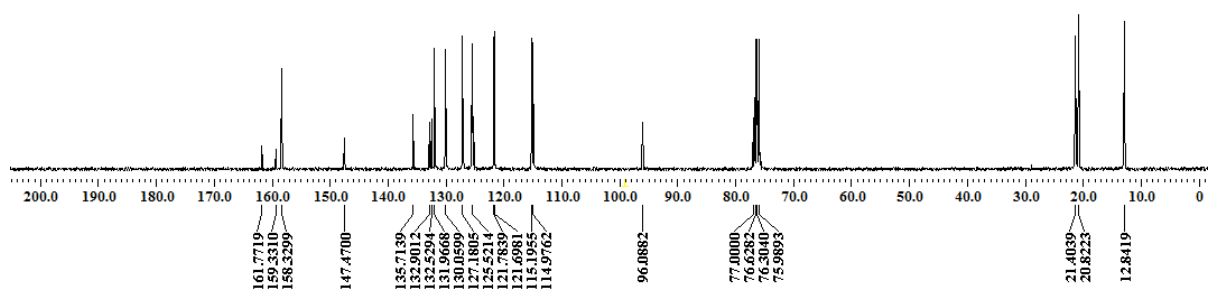

HRMS: (*E*)-4-fluoro-*N*-(2-(pent-1-yn-1-yl)benzylidene)aniline (**1h**)

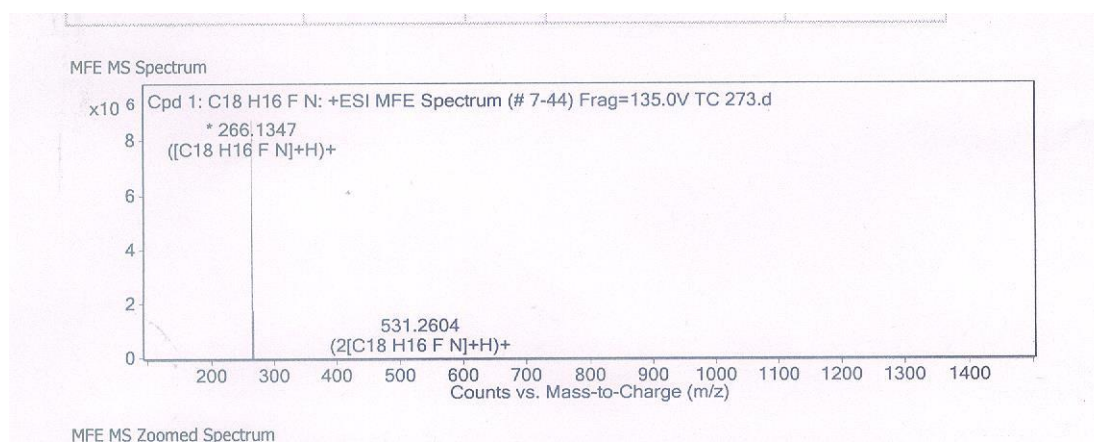

<sup>1</sup>H NMR in CDCl<sub>3</sub>

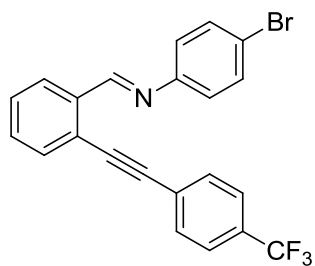

(*E*)-4-bromo-*N*-(2-((4-(trifluoromethyl)phenyl)ethynyl)benzylidene)aniline (**1i**)

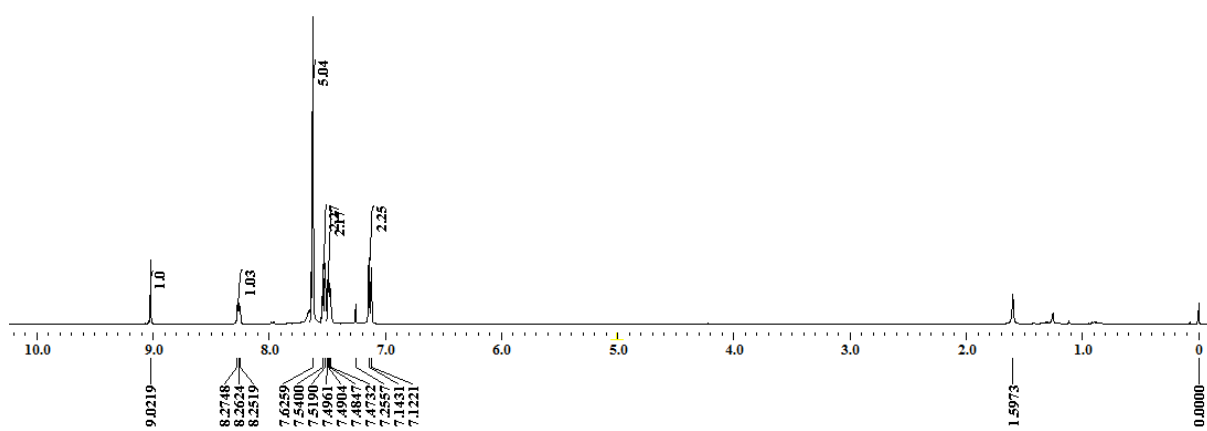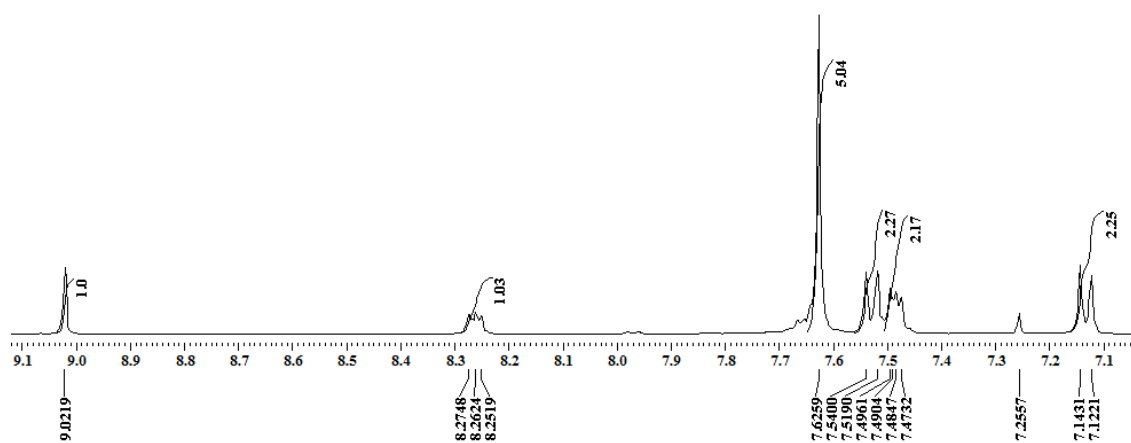



<sup>13</sup>C NMR in CDCl<sub>3</sub>

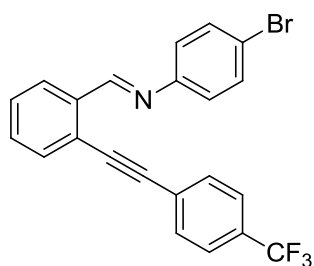

(*E*)-4-bromo-*N*-(2-((4-(trifluoromethyl)phenyl)ethynyl)benzylidene)aniline (**1i**)

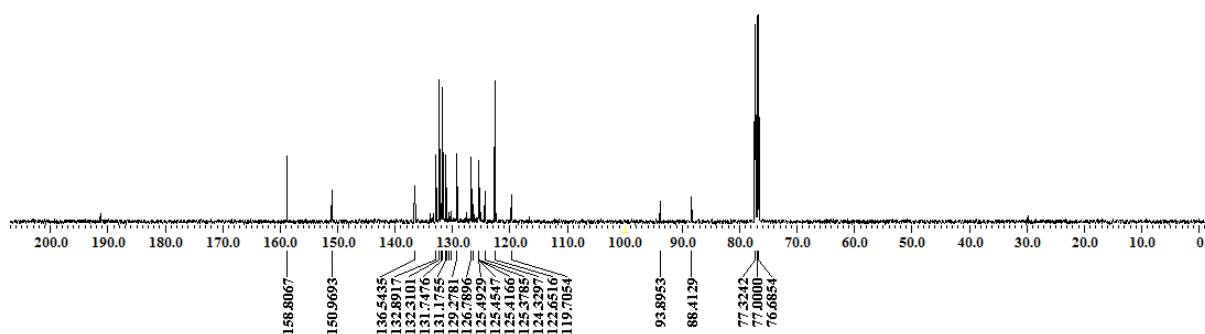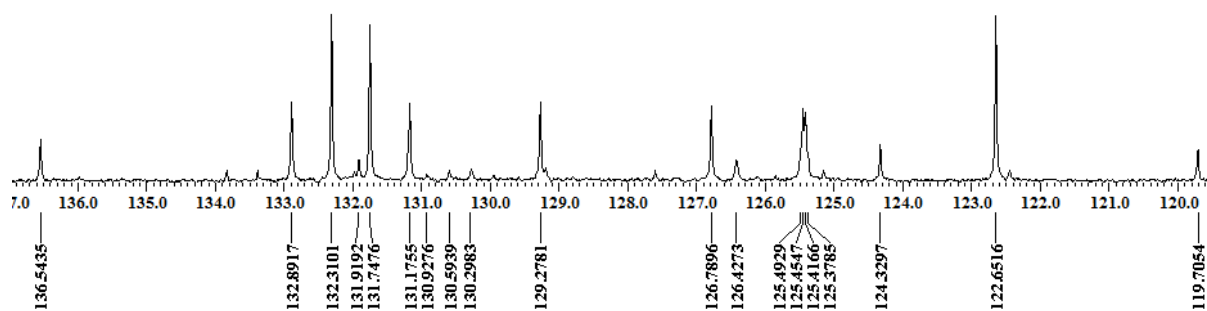

HRMS: (*E*)-4-bromo-*N*-(2-((4-(trifluoromethyl)phenyl)ethynyl)benzylidene)aniline (**1i**)

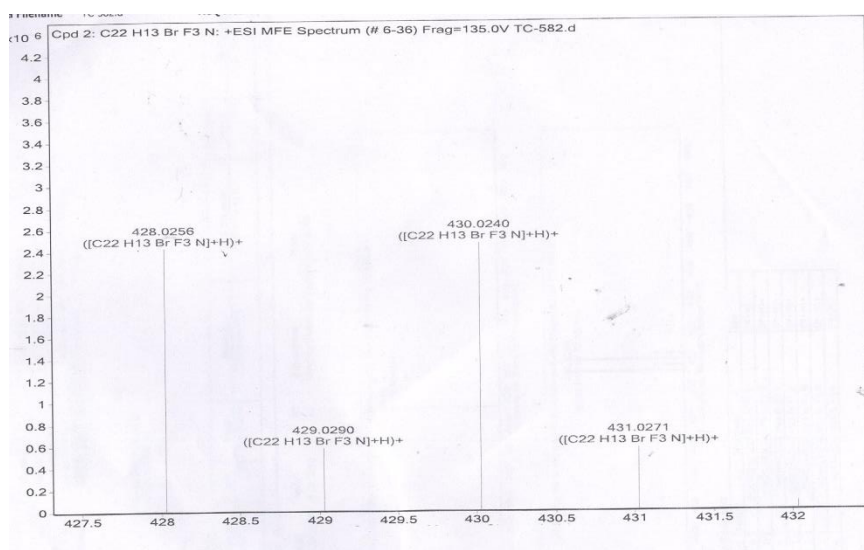

<sup>1</sup>H NMR in CDCl<sub>3</sub>

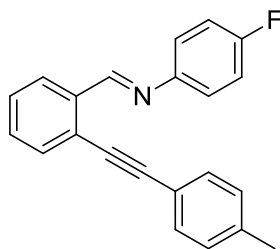

(E)-4-Fluoro-N-(2-(p-tolylethynyl)benzylidene)aniline (**1j**)

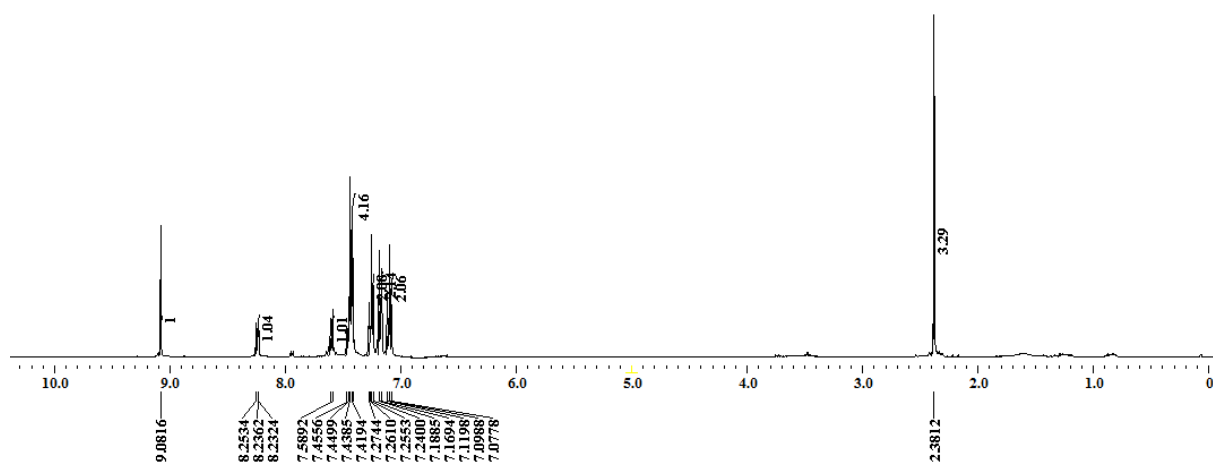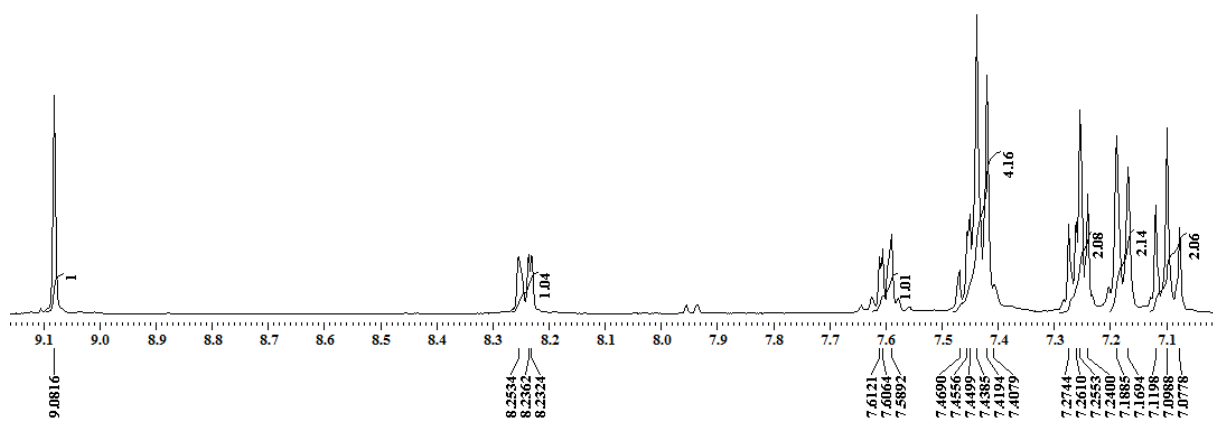

<sup>13</sup>C NMR in CDCl<sub>3</sub>

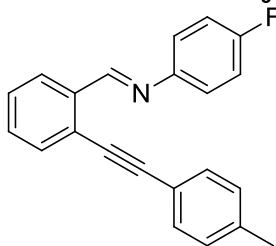

(*E*)-4-Fluoro-*N*-(2-(*p*-tolylethynyl)benzylidene)aniline (**1j**)

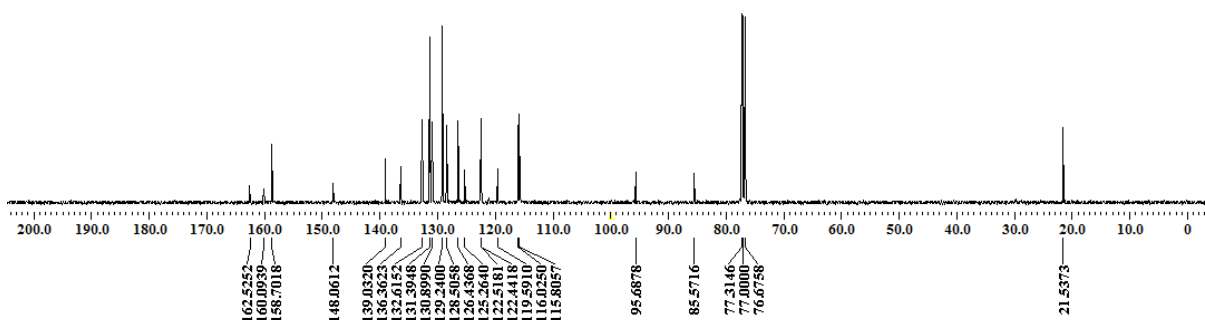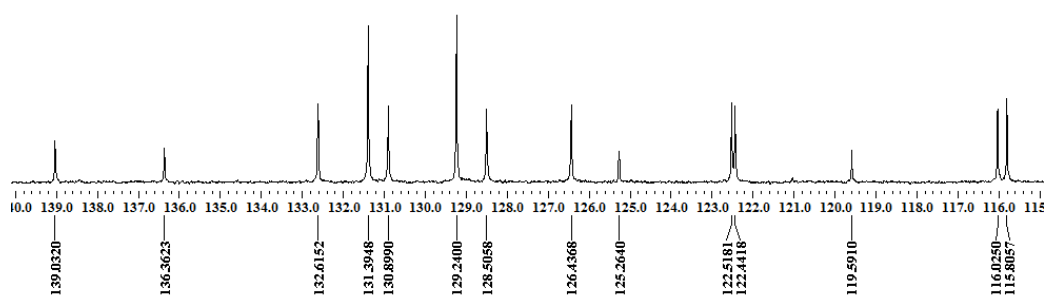

HRMS: (*E*)-4-Fluoro-*N*-(2-(*p*-tolylethynyl)benzylidene)aniline (**1j**)

Compound Table

| Compound Label     | RT | Mass     | Formula     | MFG Formula | MFG Diff (ppm) | DB Formula  |
|--------------------|----|----------|-------------|-------------|----------------|-------------|
| Cpd 4: C22 H16 F N | 11 | 313.1252 | C22 H16 F N | C22 H16 F N | 4.65           | C22 H16 F N |

| Compound Label     | m/z      | RT | Algorithm                 | Mass     |
|--------------------|----------|----|---------------------------|----------|
| Cpd 4: C22 H16 F N | 314.1325 | 11 | Find by Molecular Feature | 313.1252 |

MFE MS Spectrum

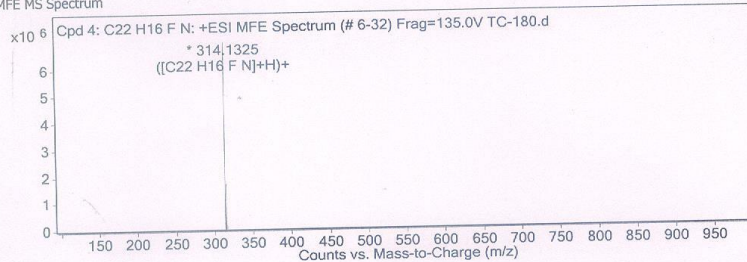

<sup>1</sup>H NMR in CDCl<sub>3</sub>

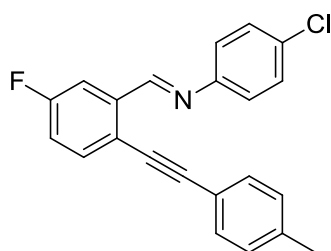

(*E*)-4-chloro-*N*-(5-fluoro-2-(*p*-tolylethynyl)benzylidene)aniline (**1k**)

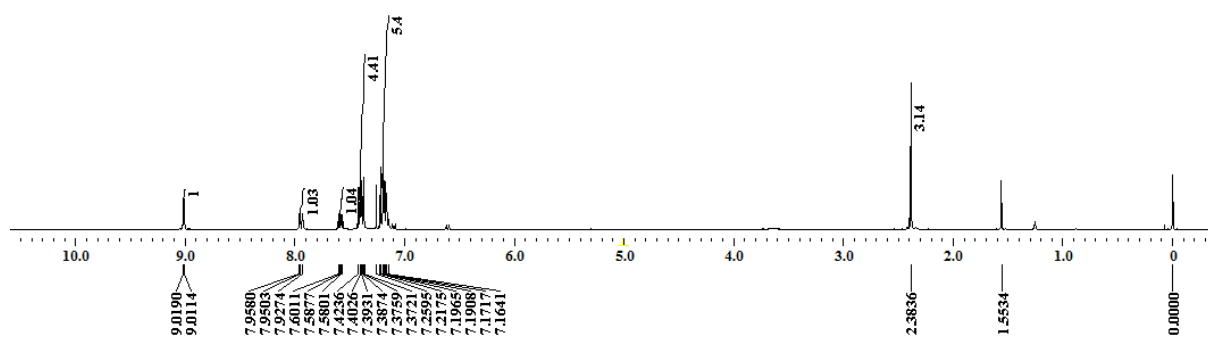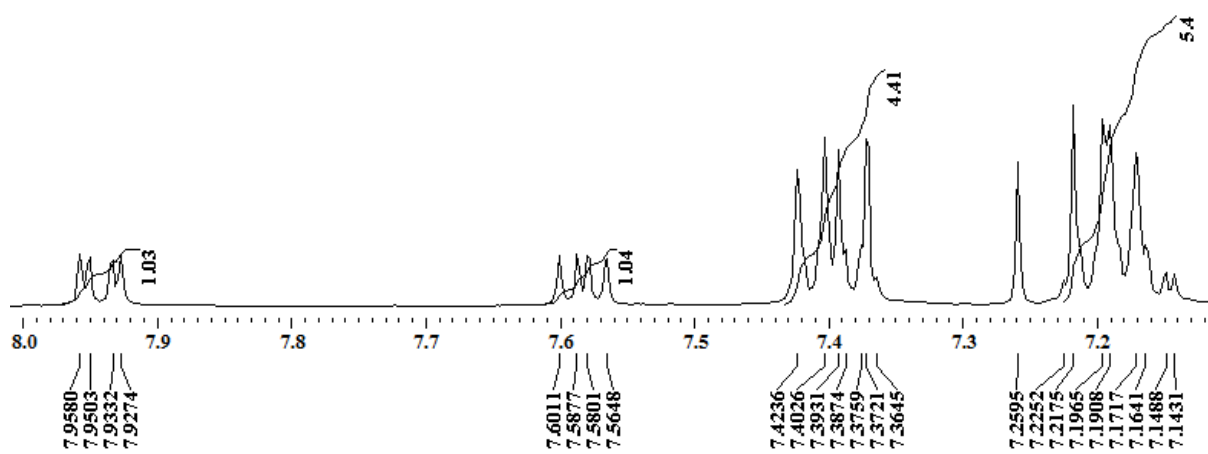

<sup>13</sup>C NMR in CDCl<sub>3</sub>

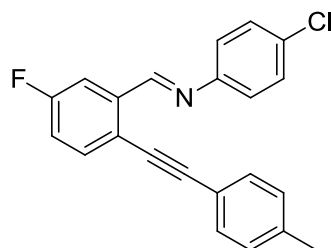

(*E*)-4-Chloro-*N*-(5-fluoro-2-(*p*-tolylethynyl)benzylidene)aniline (**1k**)

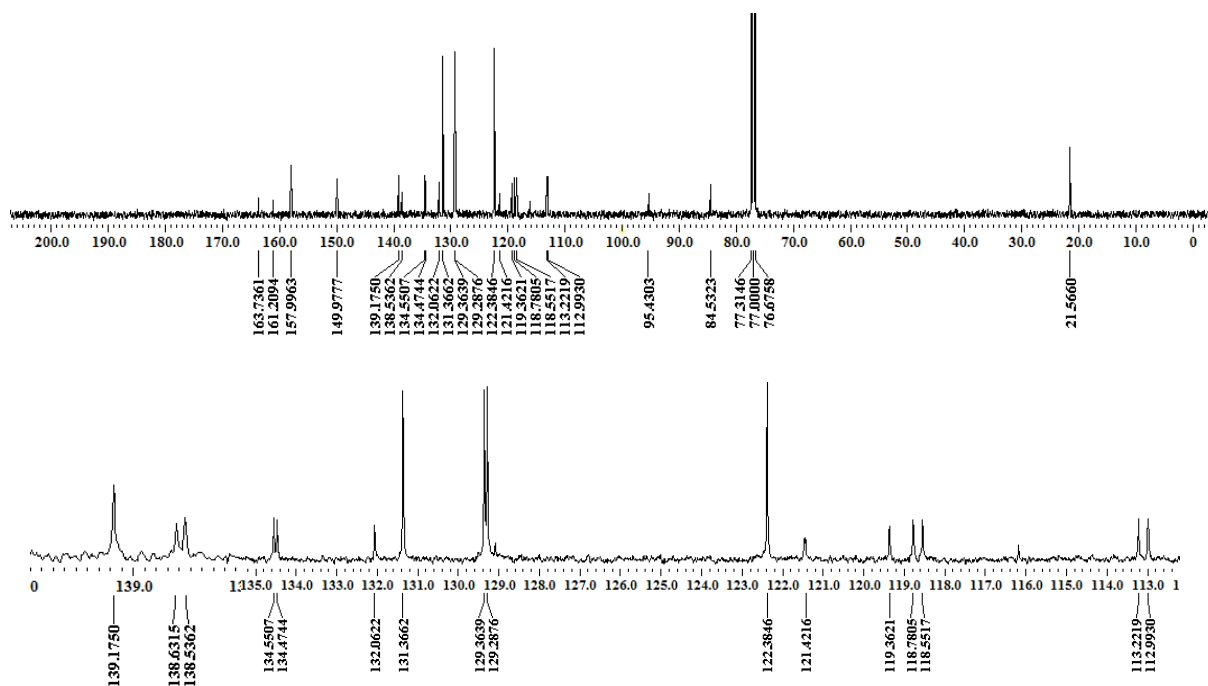

HRMS: (*E*)-4-Chloro-*N*-(5-fluoro-2-(*p*-tolylethynyl)benzylidene)aniline (**1k**)

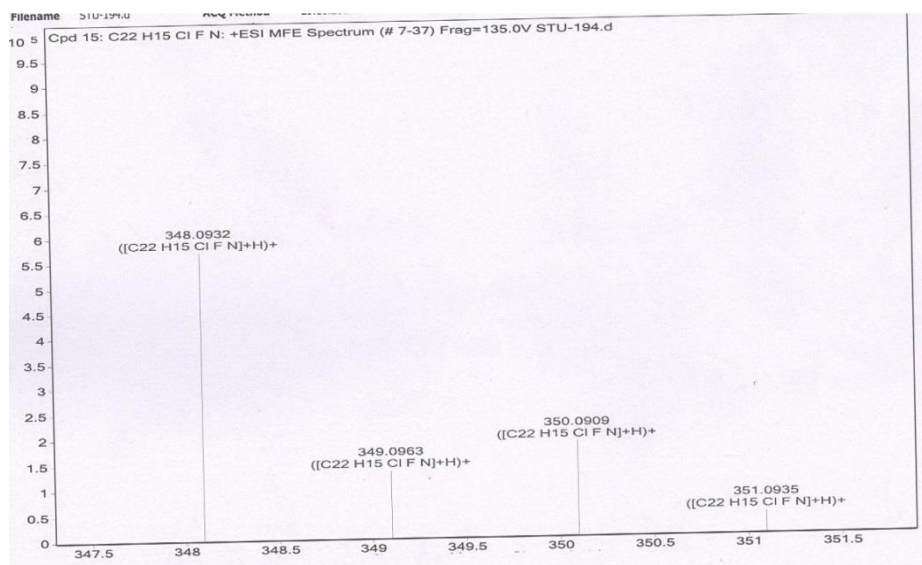

<sup>1</sup>H NMR in CDCl<sub>3</sub>

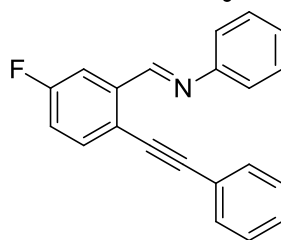

(*E*)-*N*-(5-Fluoro-2-(phenylethynyl)benzylidene)aniline (**11**)

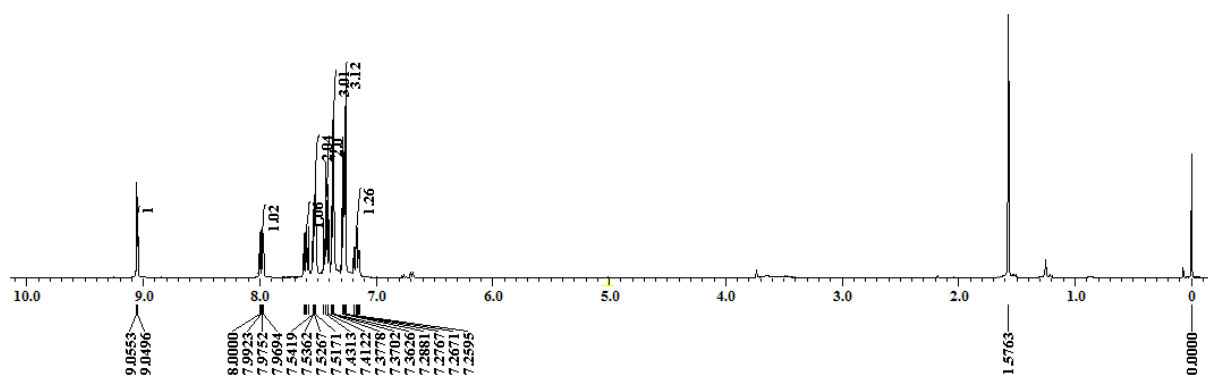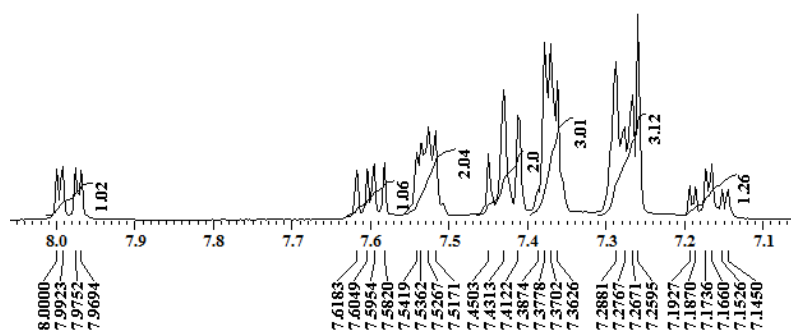

<sup>13</sup>C NMR in CDCl<sub>3</sub>

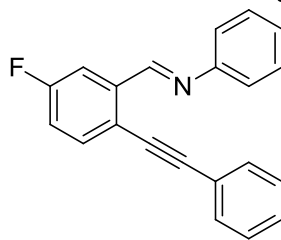

(E)-N-(5-Fluoro-2-(phenylethynyl)benzylidene)aniline (**11**)

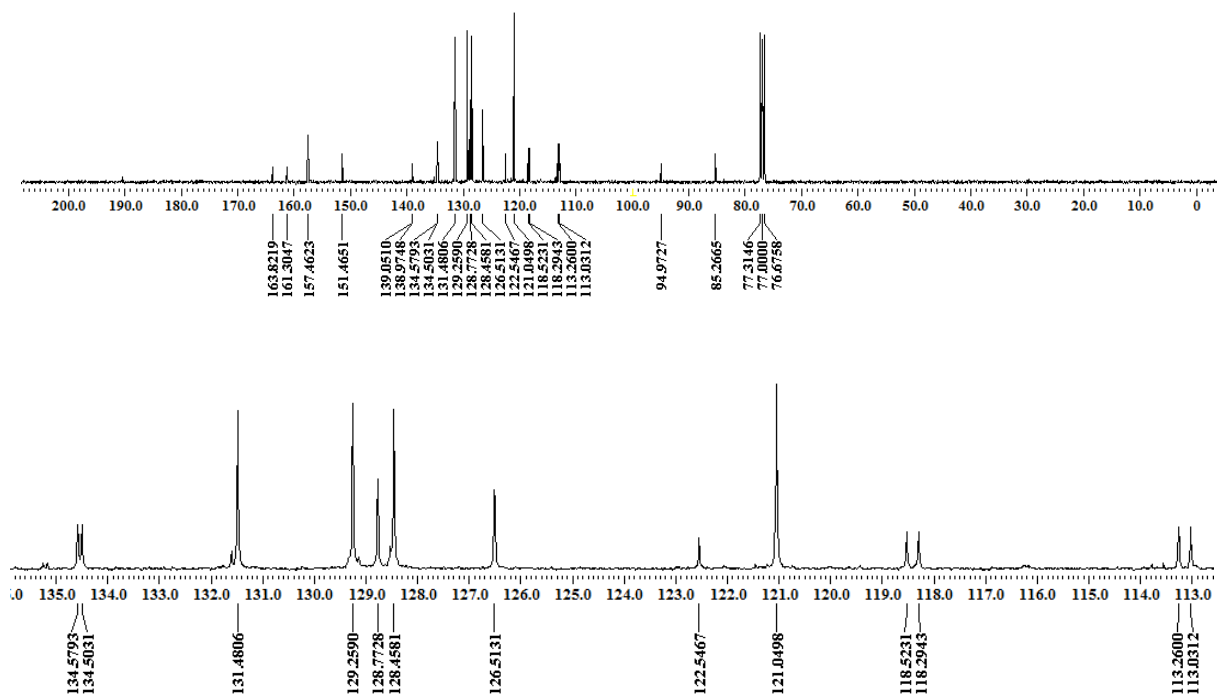

HRMS: (E)-N-(5-Fluoro-2-(phenylethynyl)benzylidene)aniline (**11**)

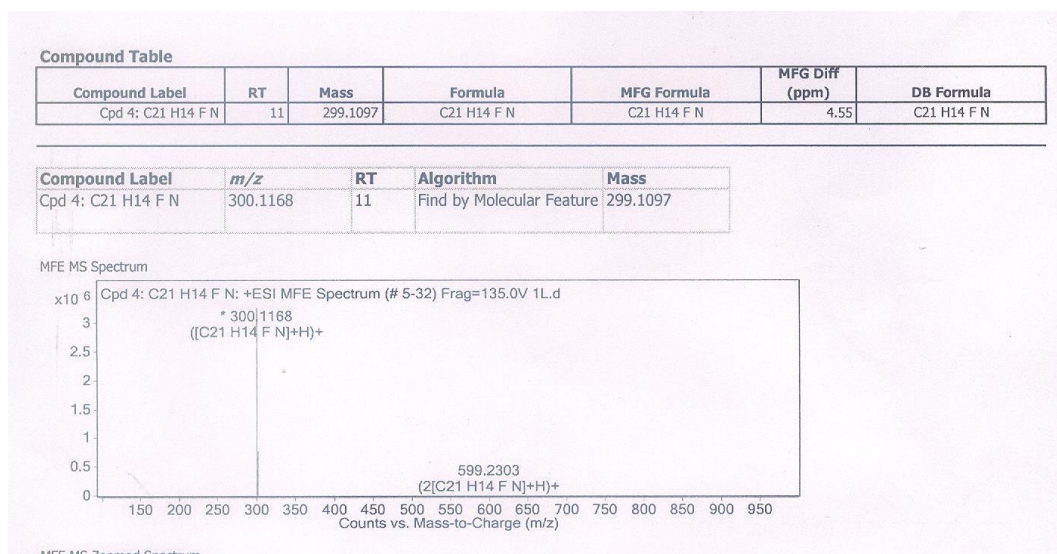

<sup>1</sup>H NMR in CDCl<sub>3</sub>

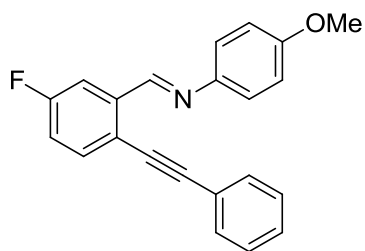

(*E*)-*N*-(5-Fluoro-2-(phenylethynyl)benzylidene)-4-methoxyaniline (**1m**)

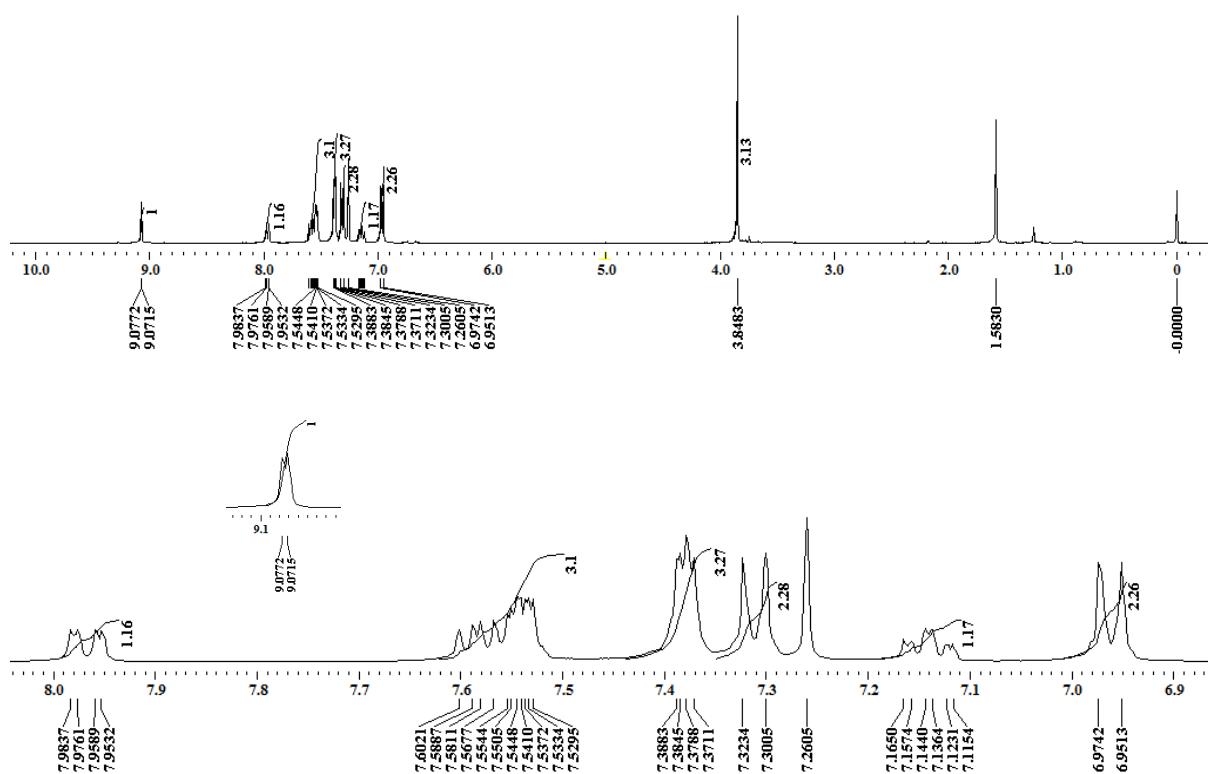

HRMS: (*E*)-*N*-(5-Fluoro-2-(phenylethynyl)benzylidene)-4-methoxyaniline (**1m**)

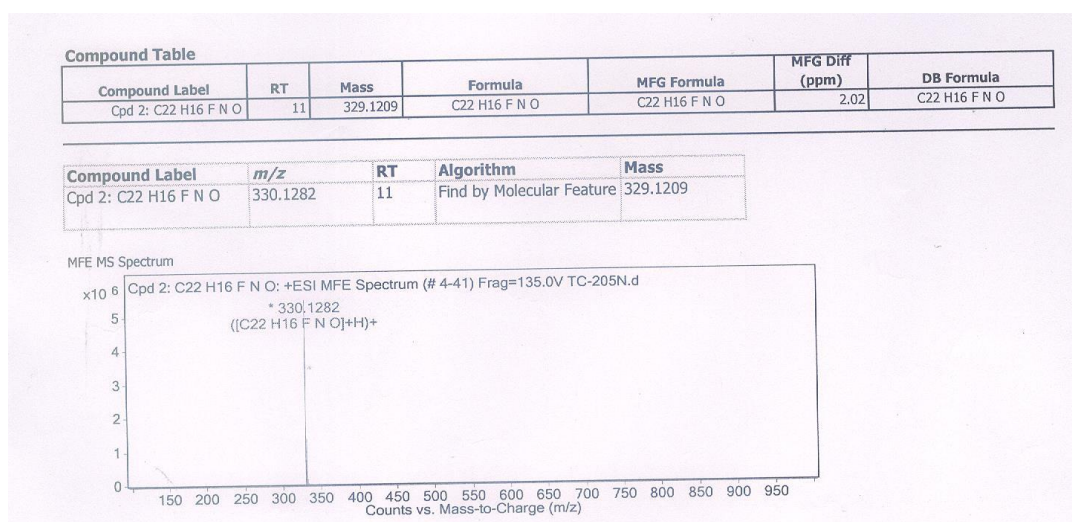



$^1\text{H}$  NMR in  $\text{CDCl}_3$

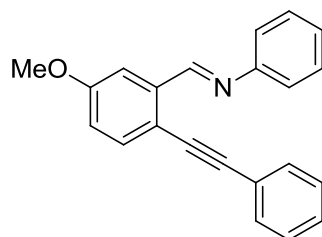

(*E*)-*N*-(5-Methoxy-2-(phenylethynyl)benzylidene)aniline (**1n**)

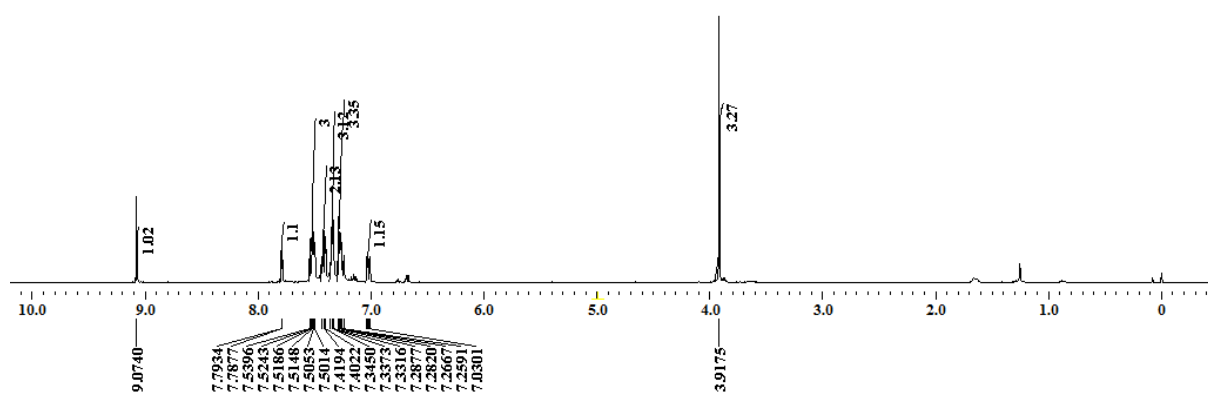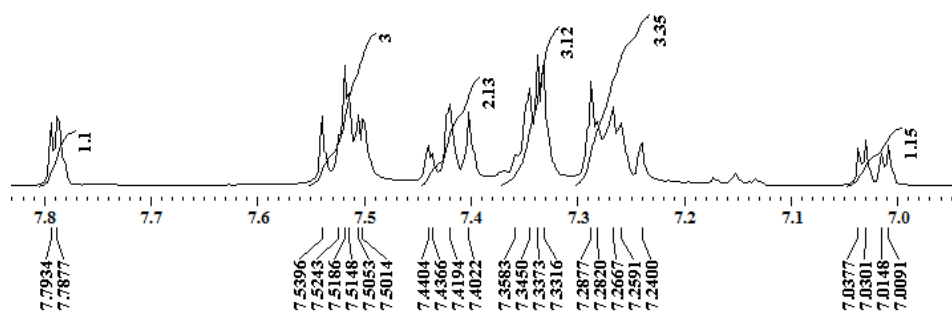

<sup>13</sup>C NMR in CDCl<sub>3</sub>

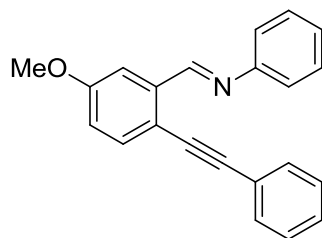

(*E*)-*N*-(5-Methoxy-2-(phenylethynyl)benzylidene)aniline (**1n**)

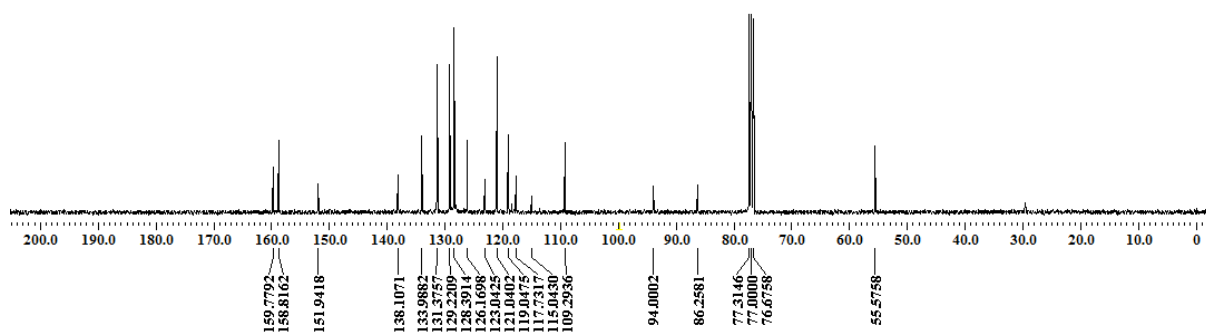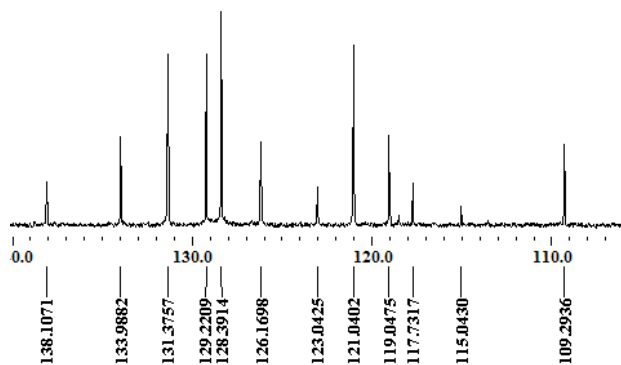

**HRMS:** (*E*)-*N*-(5-Methoxy-2-(phenylethynyl)benzylidene)aniline (**1n**)

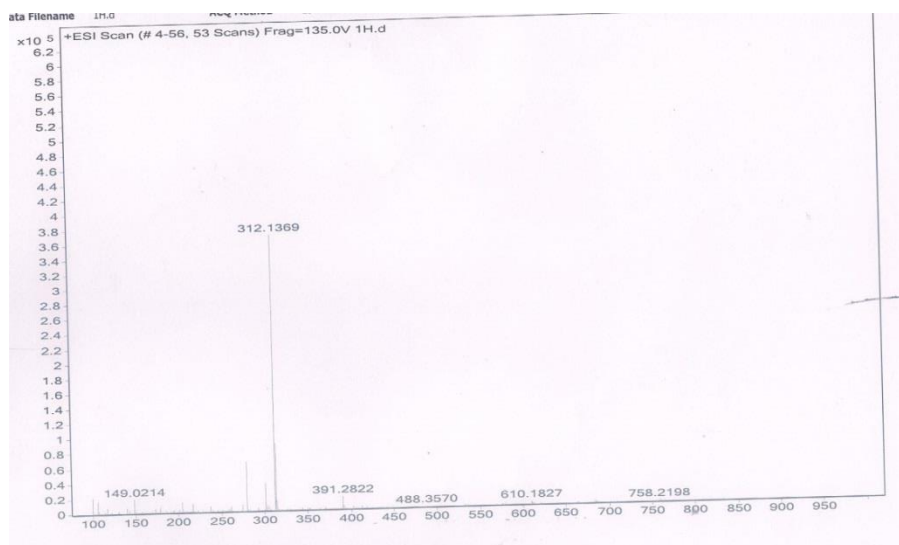

### 3. $^1\text{H}$ , $^{13}\text{C}$ NMR and HRMS Spectra of 3a-3zc, 4a and 5:

$^1\text{H}$  NMR in  $\text{CDCl}_3$

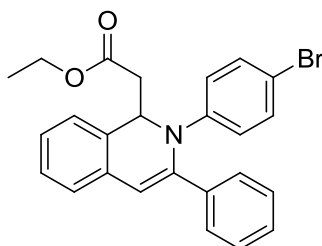

ethyl 2-(2-(4-bromophenyl)-3-phenyl-1,2-dihydroisoquinolin-1-yl)acetate (**3a**)

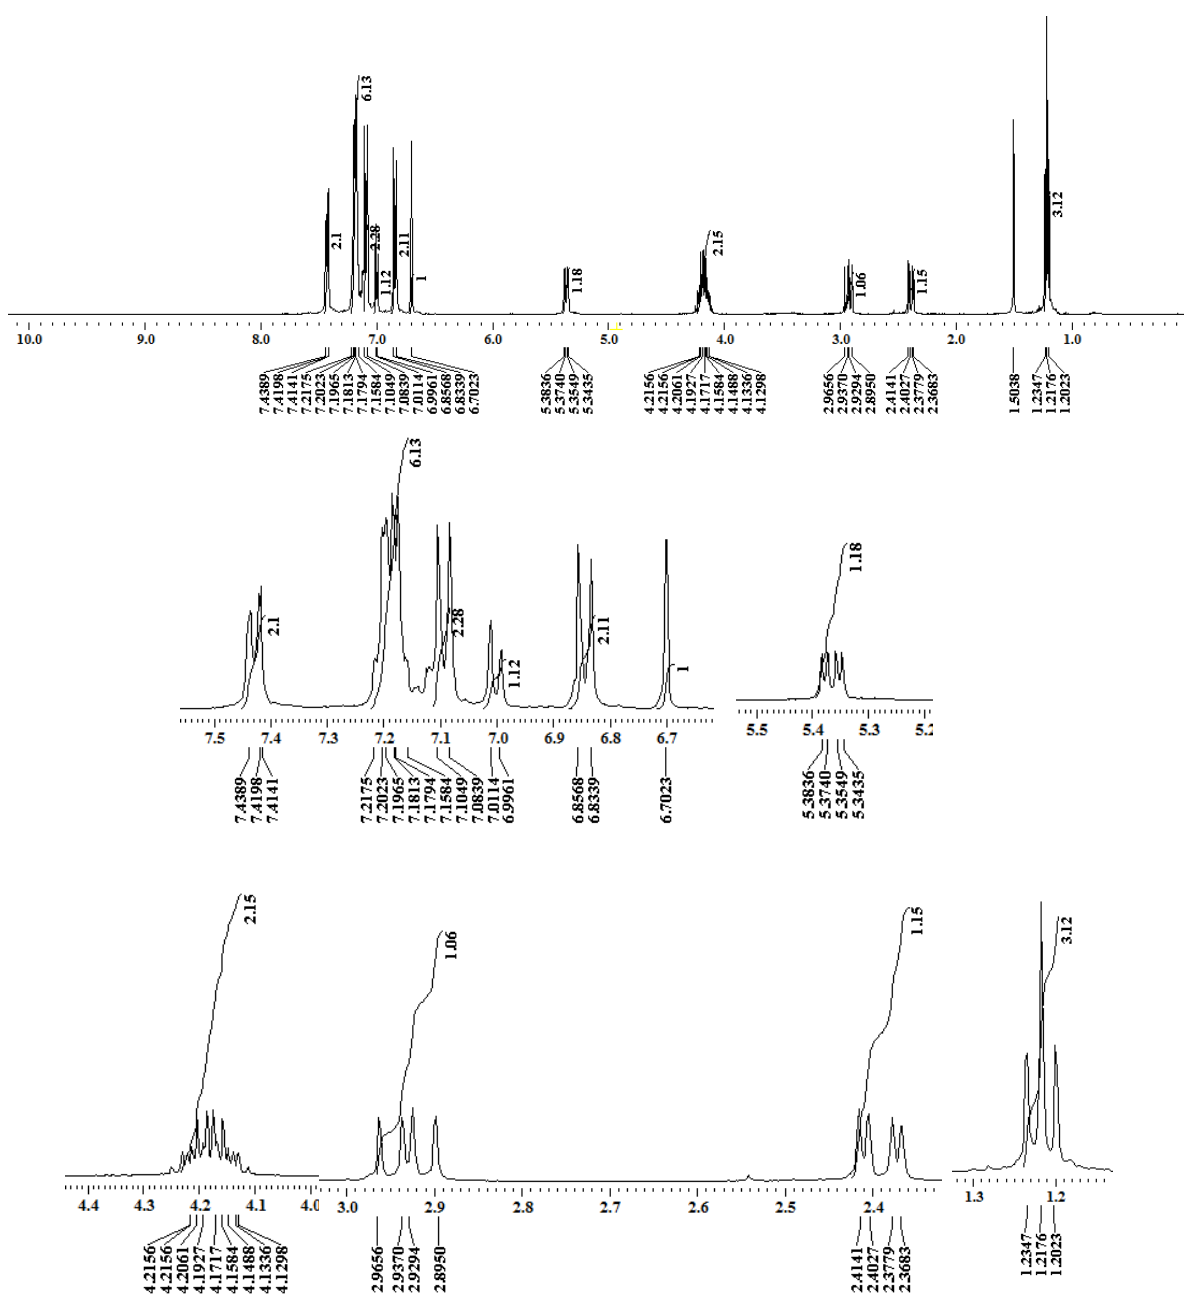

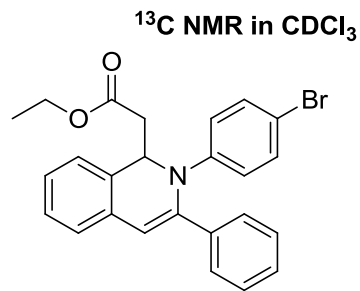

Ethyl 2-(2-(4-bromophenyl)-3-phenyl-1,2-dihydroisoquinolin-1-yl)acetate (**3a**)

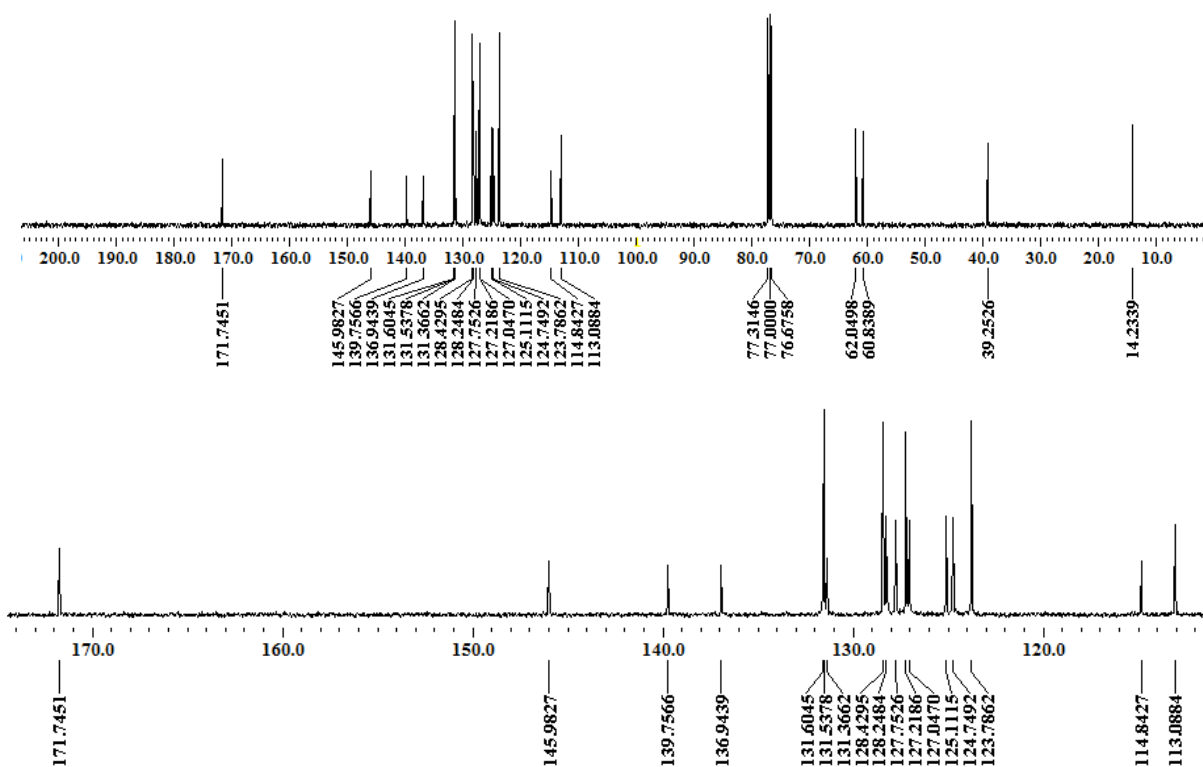

**HRMS:** Ethyl 2-(2-(4-bromophenyl)-3-phenyl-1,2-dihydroisoquinolin-1-yl)acetate (**3a**)

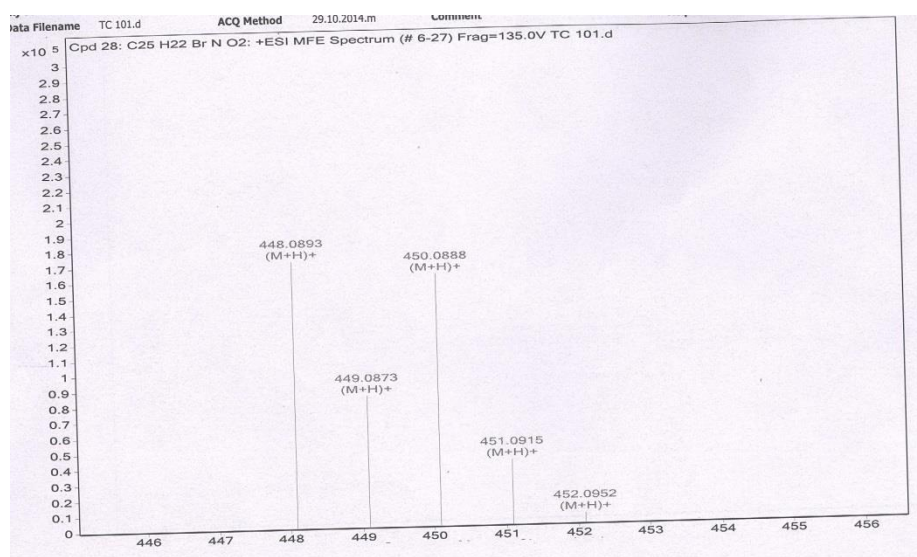

<sup>1</sup>H NMR IN CDCl<sub>3</sub>

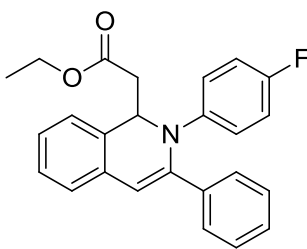

Ethyl 2-(2-(4-fluorophenyl)-3-phenyl-1,2-dihydroisoquinolin-1-yl)acetate (**3b**)

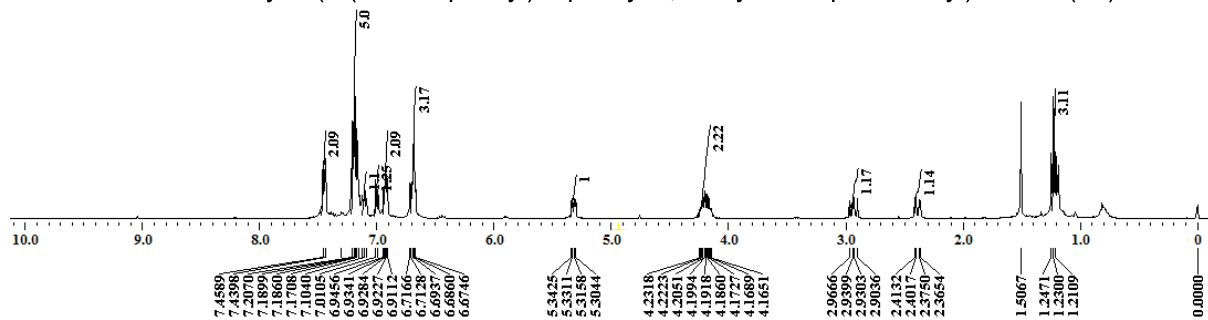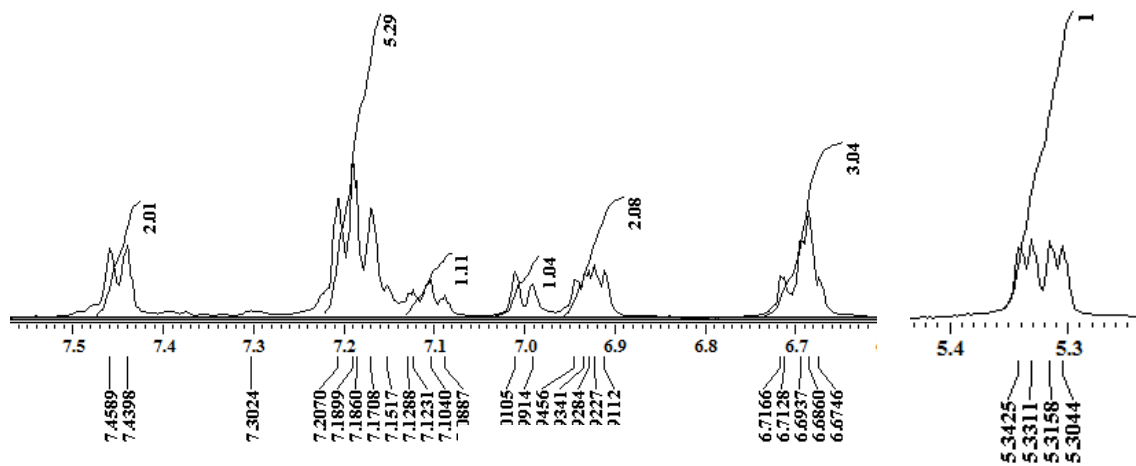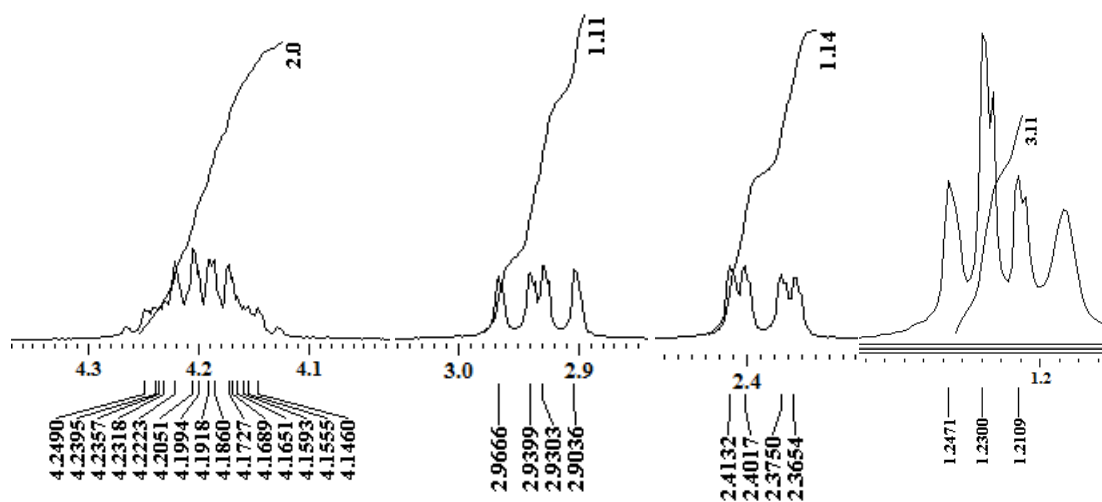

<sup>13</sup>C NMR IN CDCl<sub>3</sub>

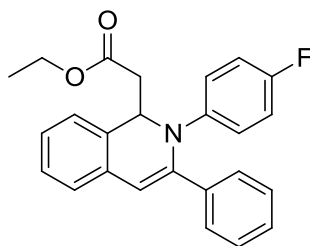

Ethyl 2-(2-(4-fluorophenyl)-3-phenyl-1,2-dihydroisoquinolin-1-yl)acetate (**3b**)

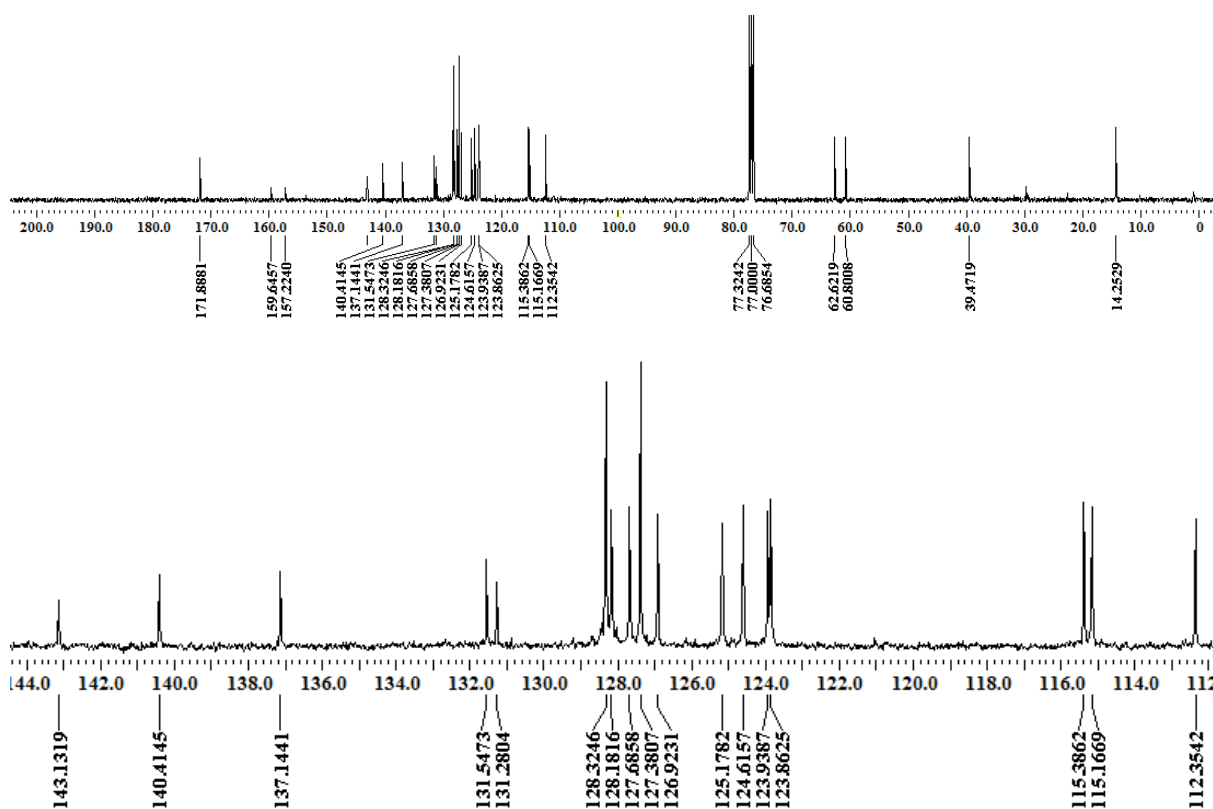

HRMS: ethyl 2-(2-(4-fluorophenyl)-3-phenyl-1,2-dihydroisoquinolin-1-yl)acetate (**3b**)

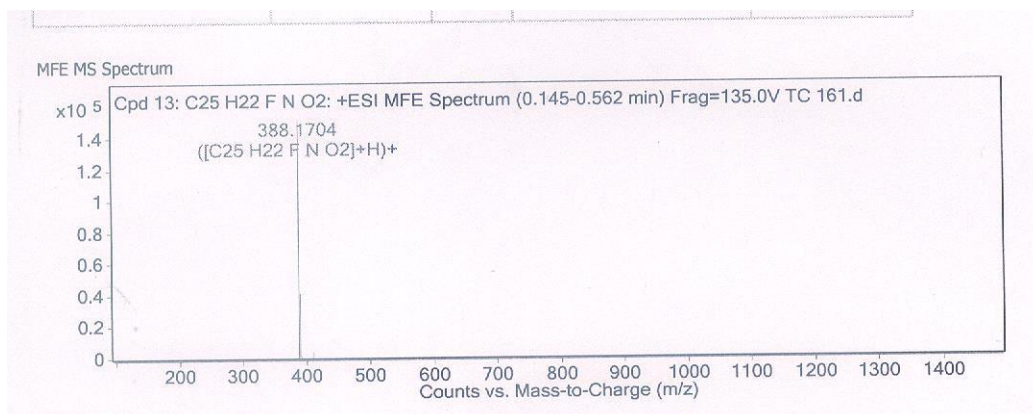

<sup>1</sup>H NMR in CDCl<sub>3</sub>

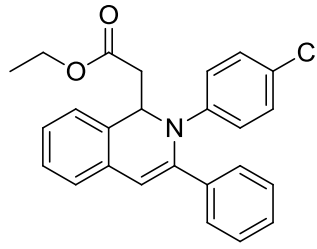

Ethyl 2-(2-(4-chlorophenyl)-3-phenyl-1,2-dihydroisoquinolin-1-yl)acetate (**3c**)

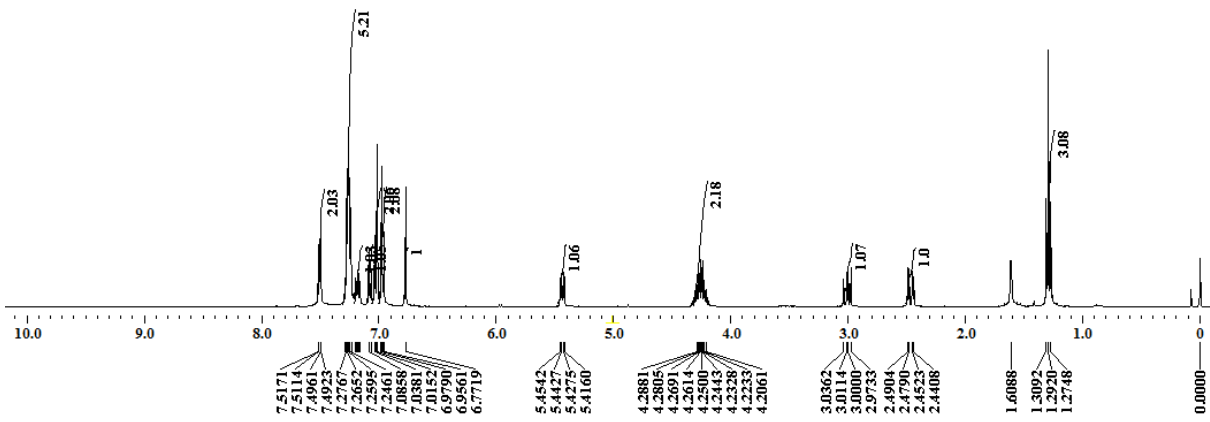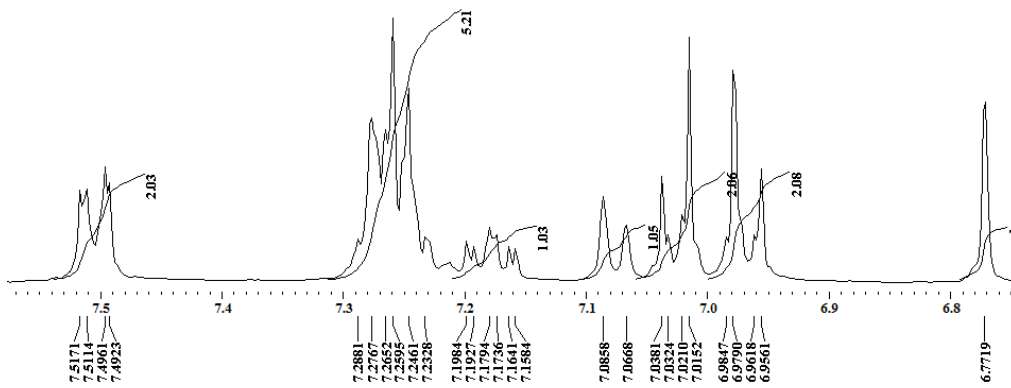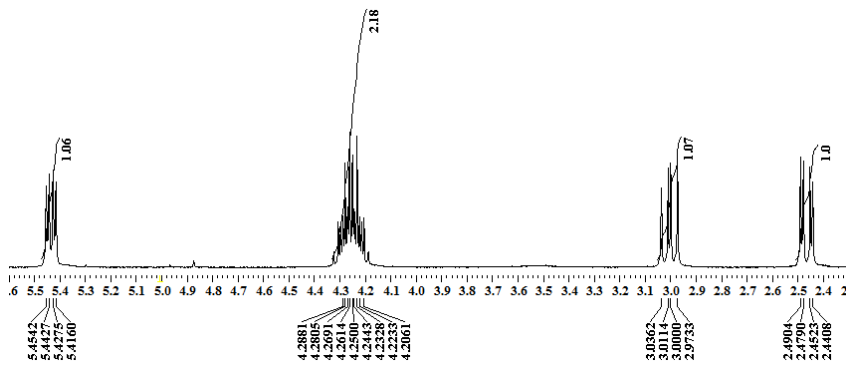

<sup>13</sup>C NMR in CDCl<sub>3</sub>

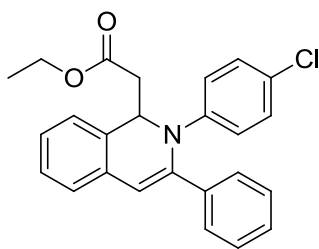

Ethyl 2-(2-(4-chlorophenyl)-3-phenyl-1,2-dihydroisoquinolin-1-yl)acetate (**3c**)

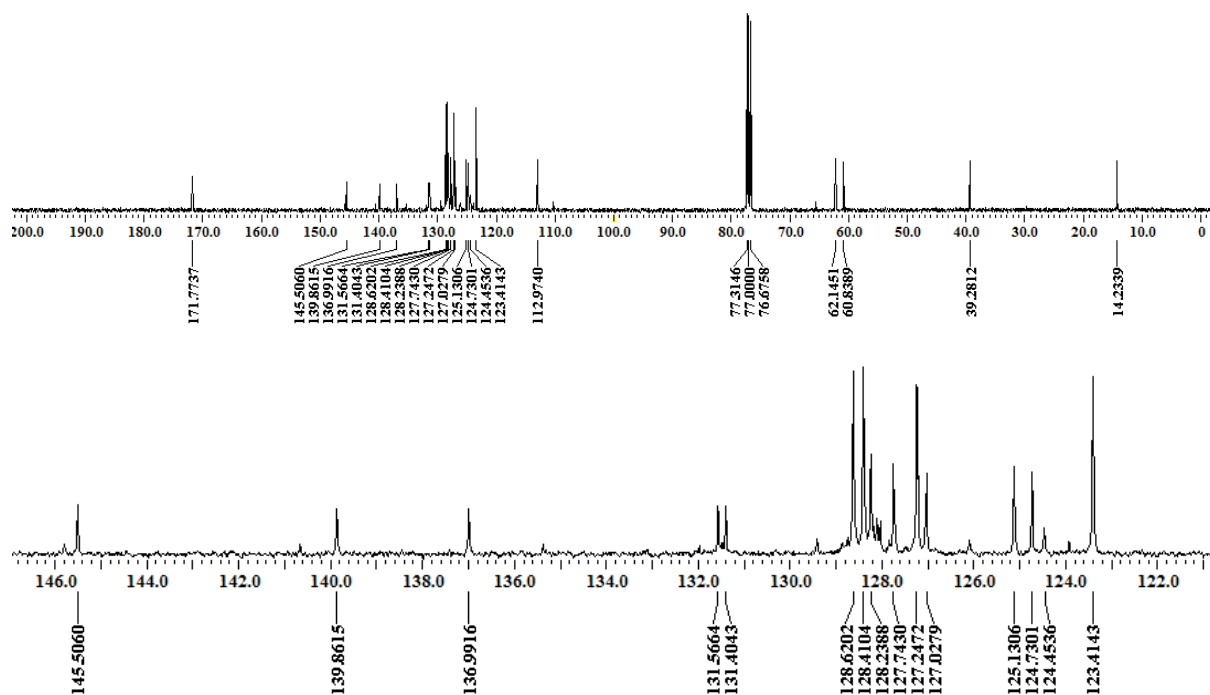

HRMS: Ethyl 2-(2-(4-chlorophenyl)-3-phenyl-1,2-dihydroisoquinolin-1-yl)acetate(**3c**)

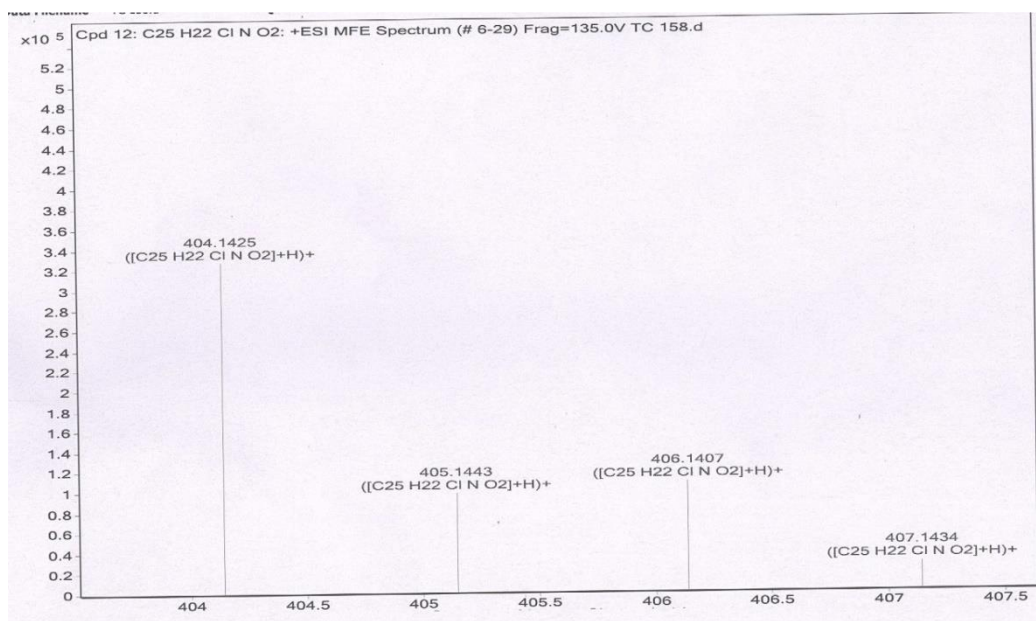



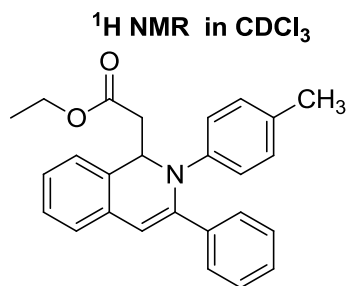

Ethyl 2-(3-phenyl-2-(*p*-tolyl)-1,2-dihydroisoquinolin-1-yl)acetate (**3d**)

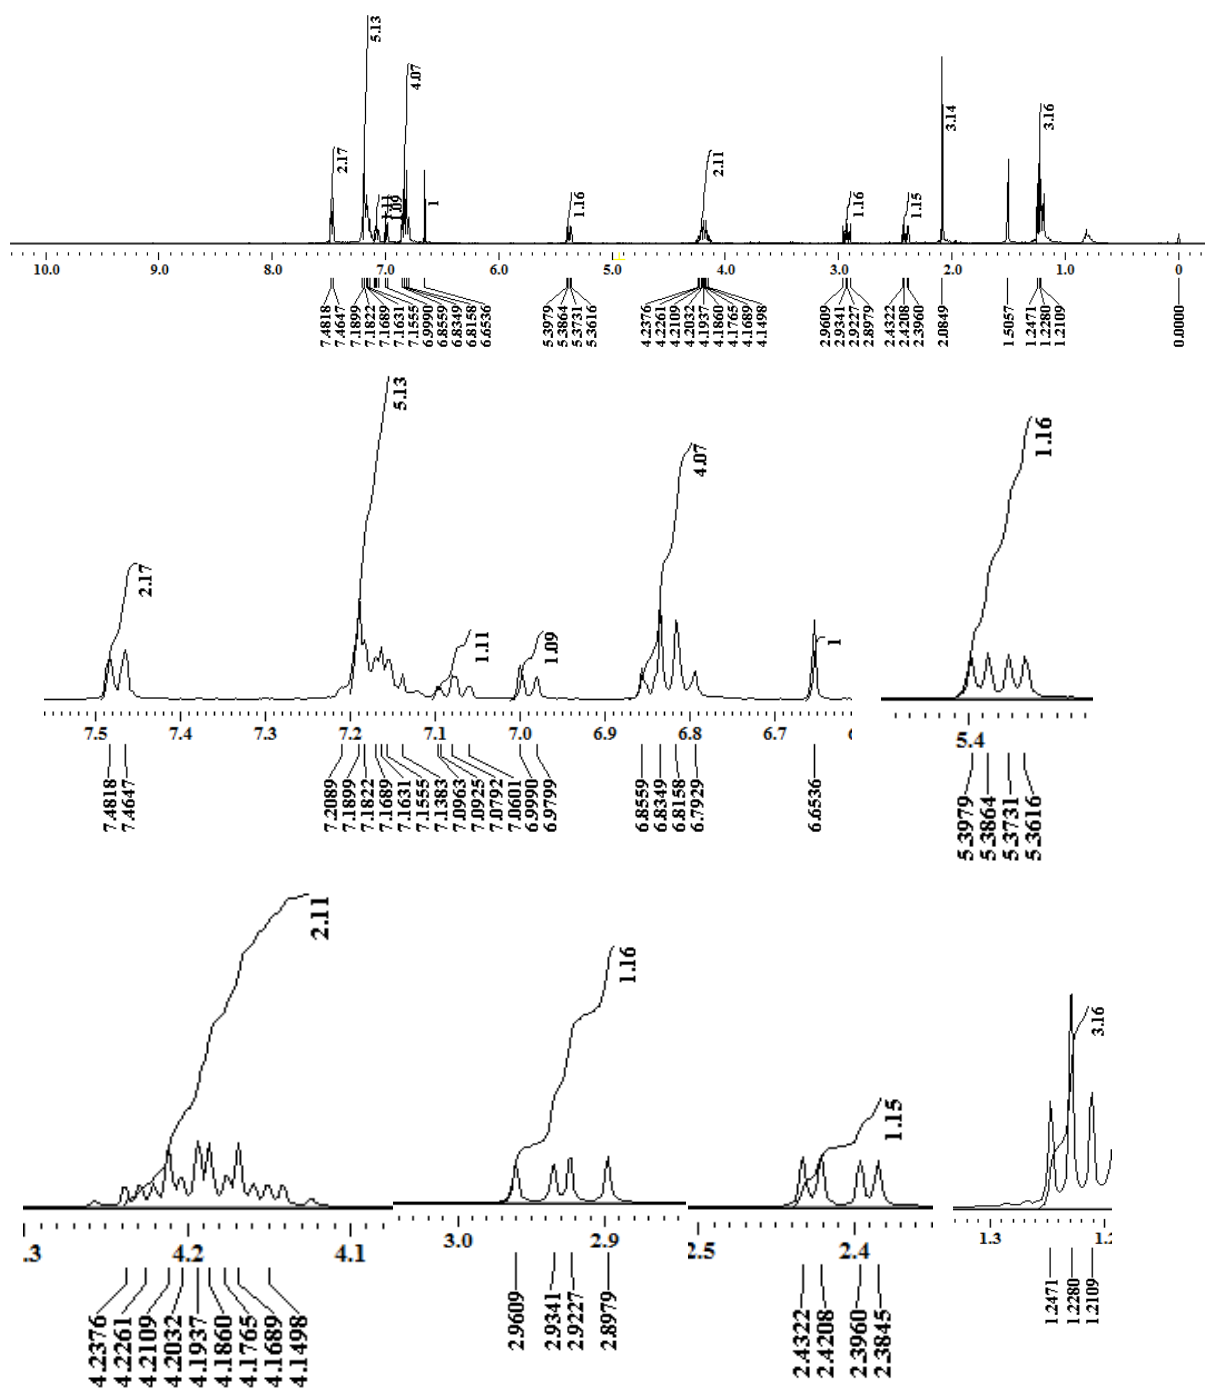

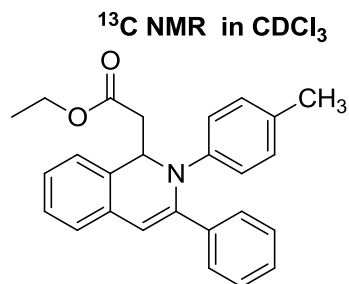

Ethyl 2-(3-phenyl-2-(p-tolyl)-1,2-dihydroisoquinolin-1-yl)acetate (**3d**)

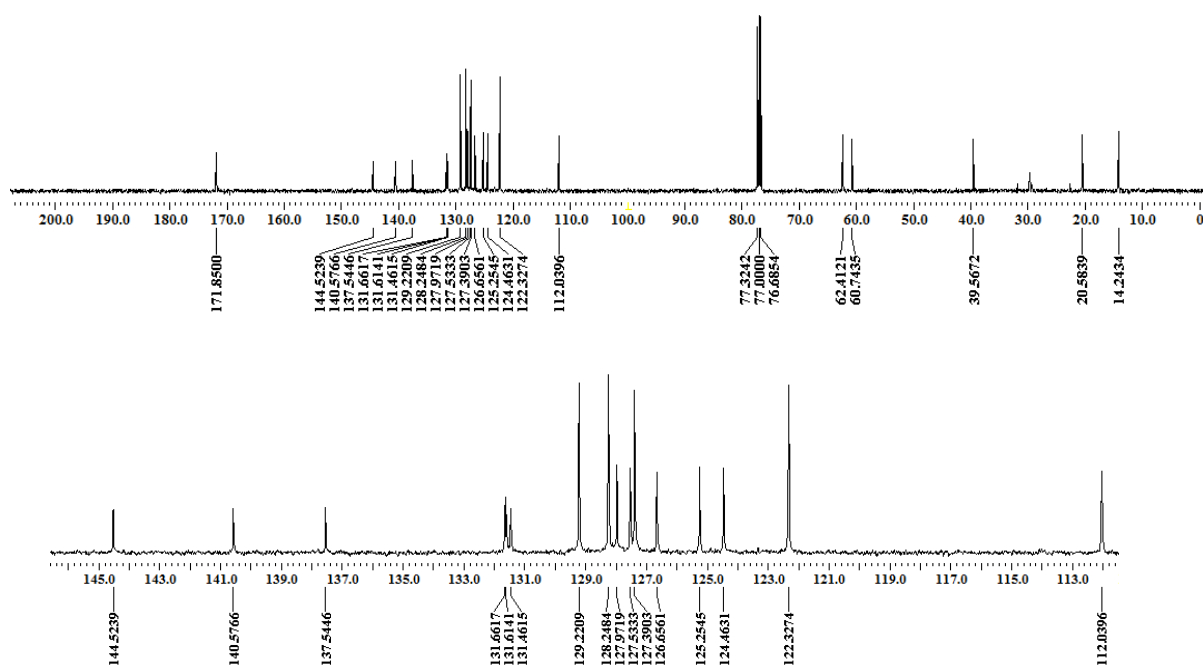

HRMS: Ethyl 2-(3-phenyl-2-(p-tolyl)-1,2-dihydroisoquinolin-1-yl)acetate (**3d**)

Compound Table

| Compound Label                                          | RT    | Mass     | Formula                                          | MFG Formula                                      | MFG Diff (ppm) | DB Formula                                       |
|---------------------------------------------------------|-------|----------|--------------------------------------------------|--------------------------------------------------|----------------|--------------------------------------------------|
| Cpd 2: C <sub>26</sub> H <sub>25</sub> N O <sub>2</sub> | 0.204 | 383.1901 | C <sub>26</sub> H <sub>25</sub> N O <sub>2</sub> | C <sub>26</sub> H <sub>25</sub> N O <sub>2</sub> | -4.04          | C <sub>26</sub> H <sub>25</sub> N O <sub>2</sub> |

| Compound Label                                          | m/z      | RT    | Algorithm                 | Mass     |
|---------------------------------------------------------|----------|-------|---------------------------|----------|
| Cpd 2: C <sub>26</sub> H <sub>25</sub> N O <sub>2</sub> | 384.1974 | 0.204 | Find by Molecular Feature | 383.1901 |

MFE MS Spectrum

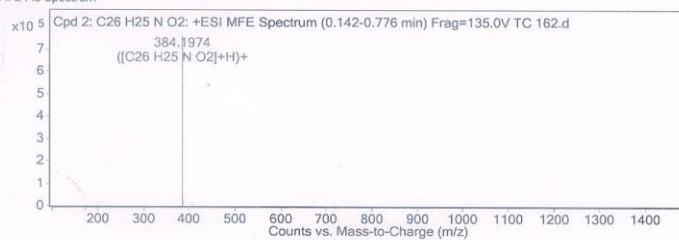

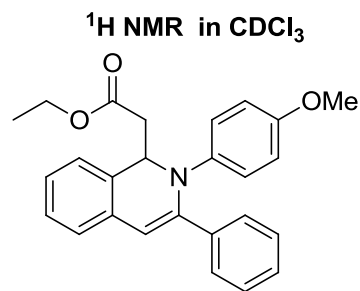

Ethyl 2-(2-(4-methoxyphenyl)-3-phenyl-1,2-dihydroisoquinolin-1-yl)acetate (**3e**)

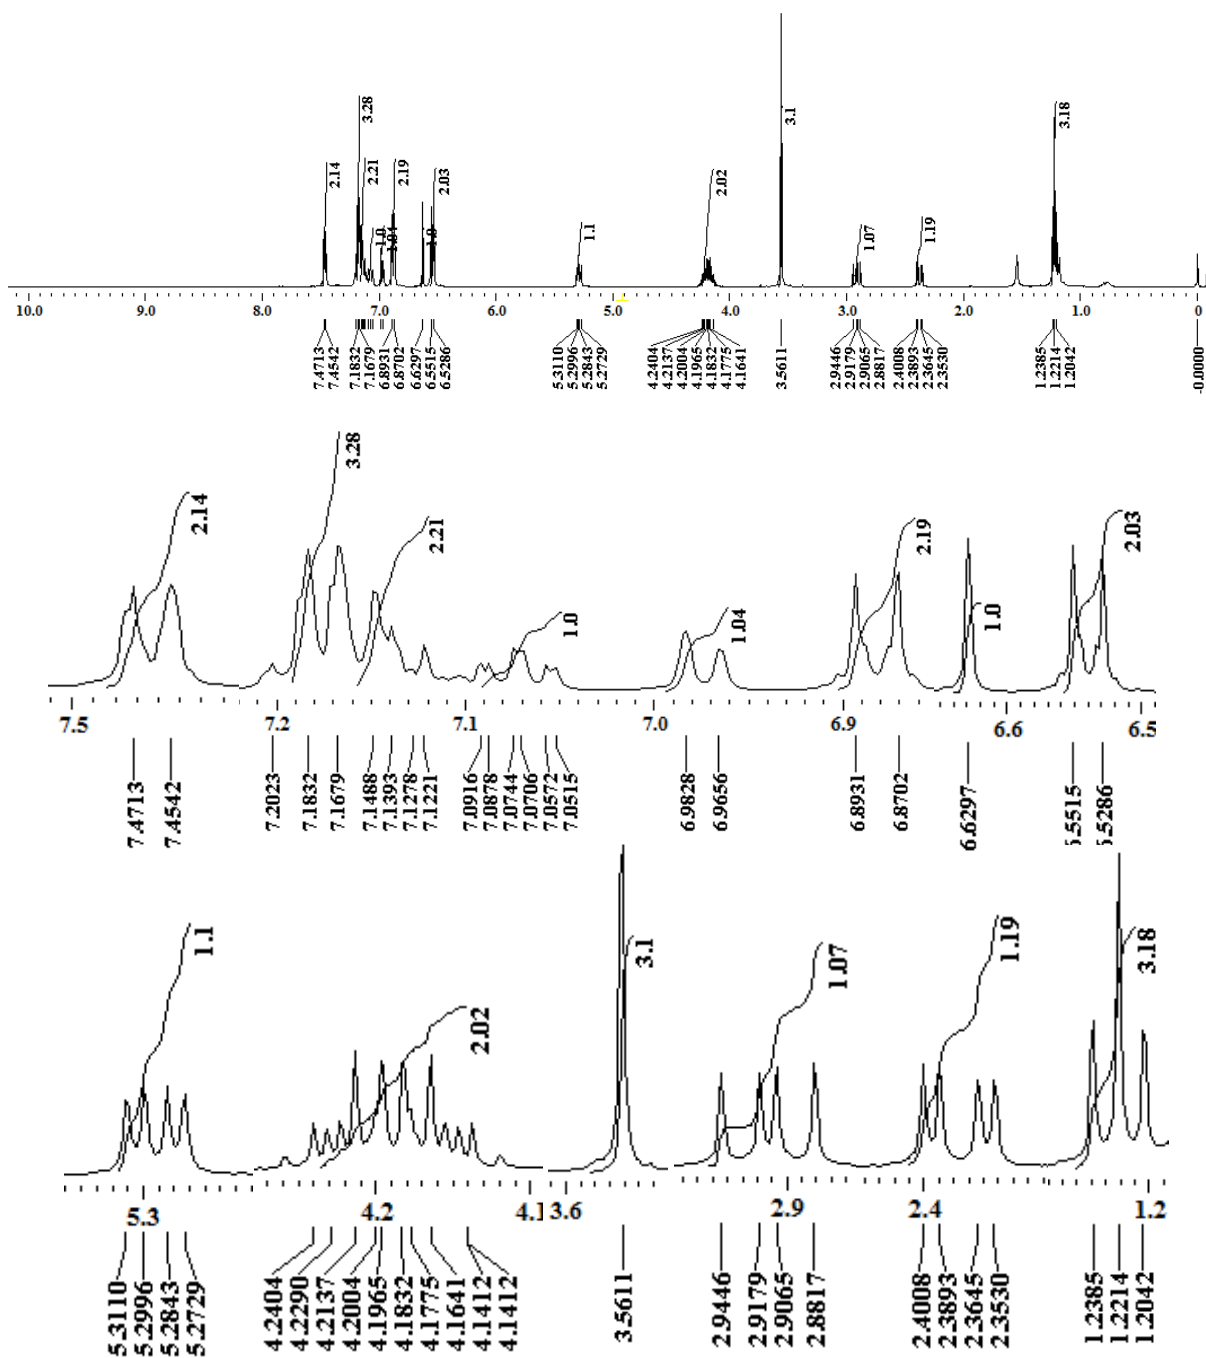

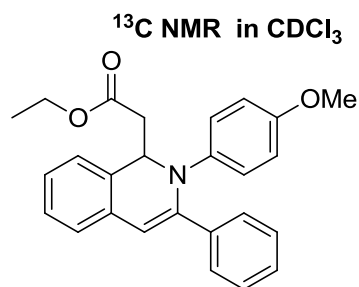

Ethyl 2-(2-(4-methoxyphenyl)-3-phenyl-1,2-dihydroisoquinolin-1-yl)acetate (**3e**)

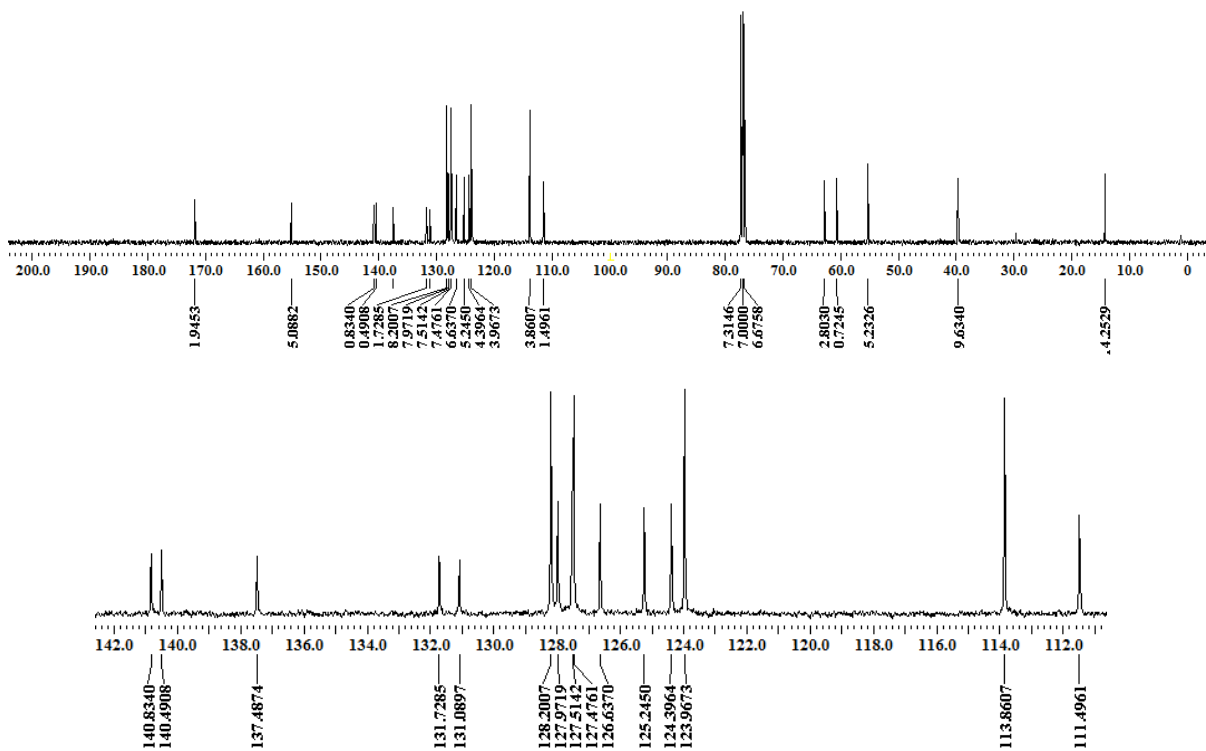

**HRMS:** Ethyl 2-(2-(4-methoxyphenyl)-3-phenyl-1,2-dihydroisoquinolin-1-yl)acetate (**3e**)

**Compound Table**

| Compound Label                                          | RT | Mass    | Formula                                          | MFG Formula                                      | MFG Diff (ppm) | DB Formula                                       |
|---------------------------------------------------------|----|---------|--------------------------------------------------|--------------------------------------------------|----------------|--------------------------------------------------|
| Cpd 1: C <sub>26</sub> H <sub>25</sub> N O <sub>3</sub> | 11 | 399.184 | C <sub>26</sub> H <sub>25</sub> N O <sub>3</sub> | C <sub>26</sub> H <sub>25</sub> N O <sub>3</sub> | -1.46          | C <sub>26</sub> H <sub>25</sub> N O <sub>3</sub> |

| Compound Label                                          | m/z      | RT | Algorithm                 | Mass    |
|---------------------------------------------------------|----------|----|---------------------------|---------|
| Cpd 1: C <sub>26</sub> H <sub>25</sub> N O <sub>3</sub> | 400.1914 | 11 | Find by Molecular Feature | 399.184 |

**MFE MS Spectrum**

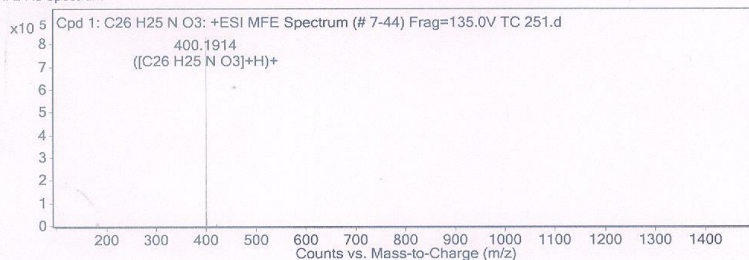

<sup>1</sup>H NMR in CDCl<sub>3</sub>

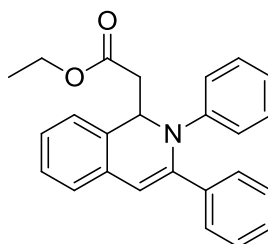

Ethyl 2-(2,3-diphenyl-1,2-dihydroisoquinolin-1-yl)acetate (**3f**)

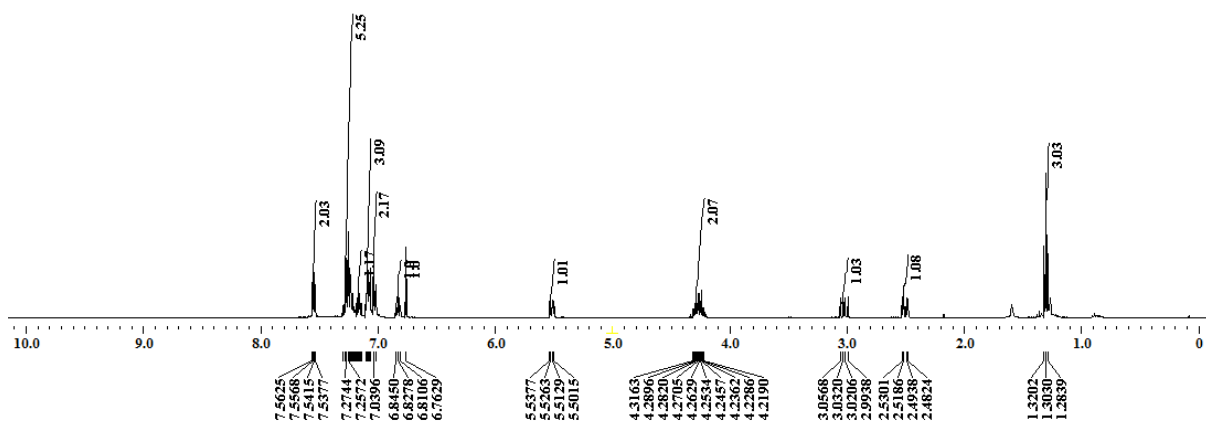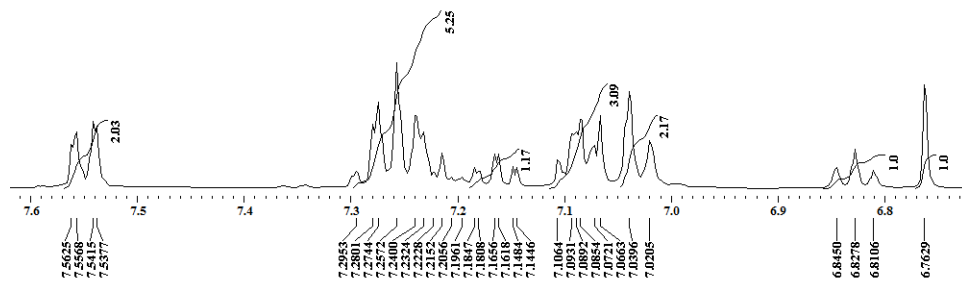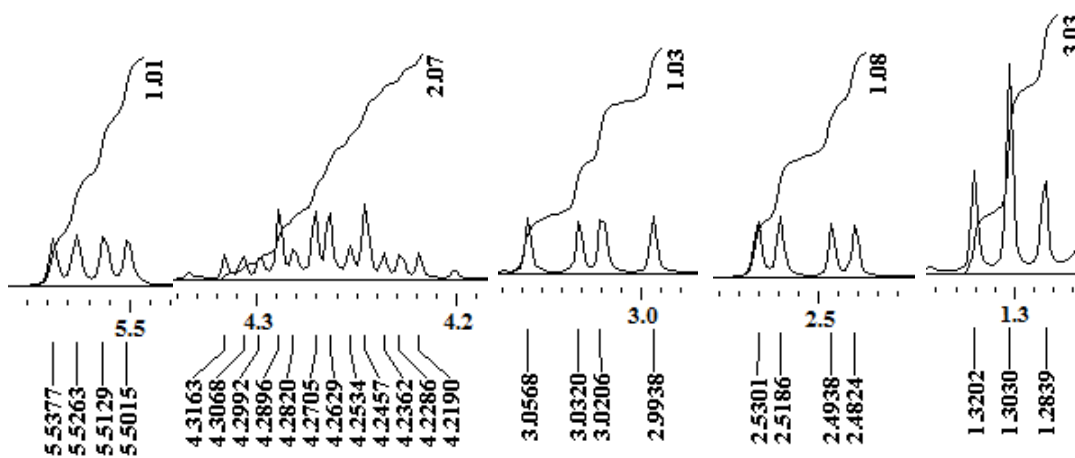

<sup>13</sup>C NMR in CDCl<sub>3</sub>

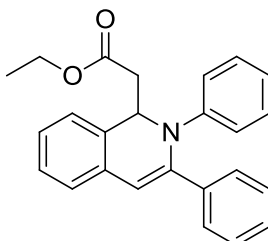

Ethyl 2-(2,3-diphenyl-1,2-dihydroisoquinolin-1-yl)acetate (**3f**)

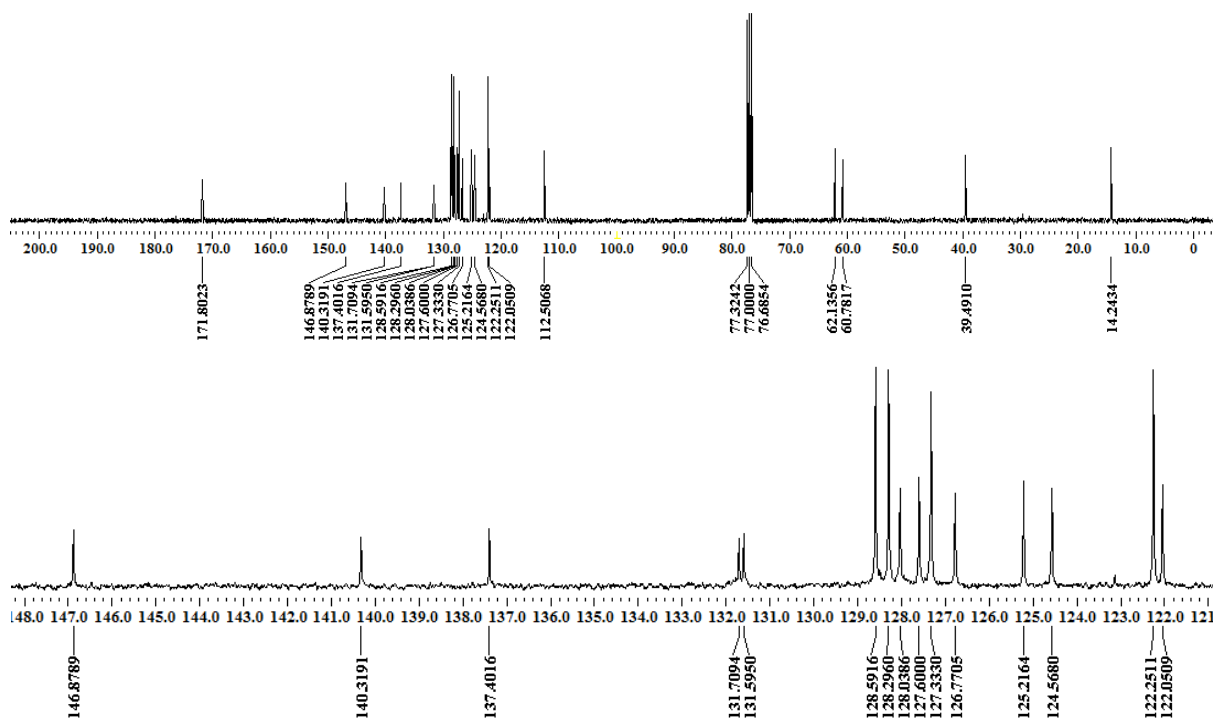

HRMS: Ethyl 2-(2,3-diphenyl-1,2-dihydroisoquinolin-1-yl)acetate (**3f**)

Compound Table

| Compound Label                                          | RT    | Mass     | Formula                                          | MFG Formula                                      | MFG Diff (ppm) | DB Formula                                       |
|---------------------------------------------------------|-------|----------|--------------------------------------------------|--------------------------------------------------|----------------|--------------------------------------------------|
| Cpd 2: C <sub>25</sub> H <sub>23</sub> N O <sub>2</sub> | 0.229 | 369.1723 | C <sub>25</sub> H <sub>23</sub> N O <sub>2</sub> | C <sub>25</sub> H <sub>23</sub> N O <sub>2</sub> | 1.66           | C <sub>25</sub> H <sub>23</sub> N O <sub>2</sub> |

| Compound Label                                          | m/z      | RT    | Algorithm                 | Mass     |
|---------------------------------------------------------|----------|-------|---------------------------|----------|
| Cpd 2: C <sub>25</sub> H <sub>23</sub> N O <sub>2</sub> | 370.1795 | 0.229 | Find by Molecular Feature | 369.1723 |

MFE MS Spectrum

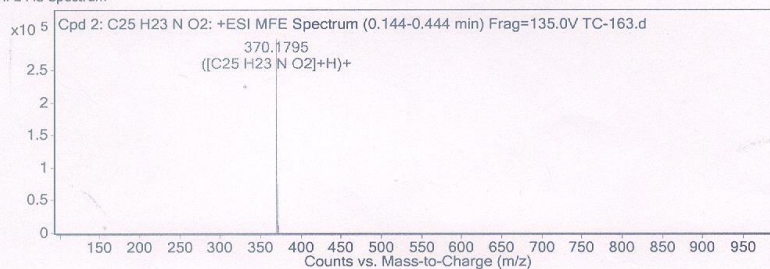

MFE MS Zoomed Spectrum

<sup>1</sup>H NMR in CDCl<sub>3</sub>

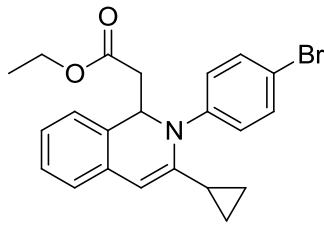

Ethyl 2-(2-(4-bromophenyl)-3-cyclopropyl-1,2-dihydroisoquinolin-1-yl)acetate (**3g**)

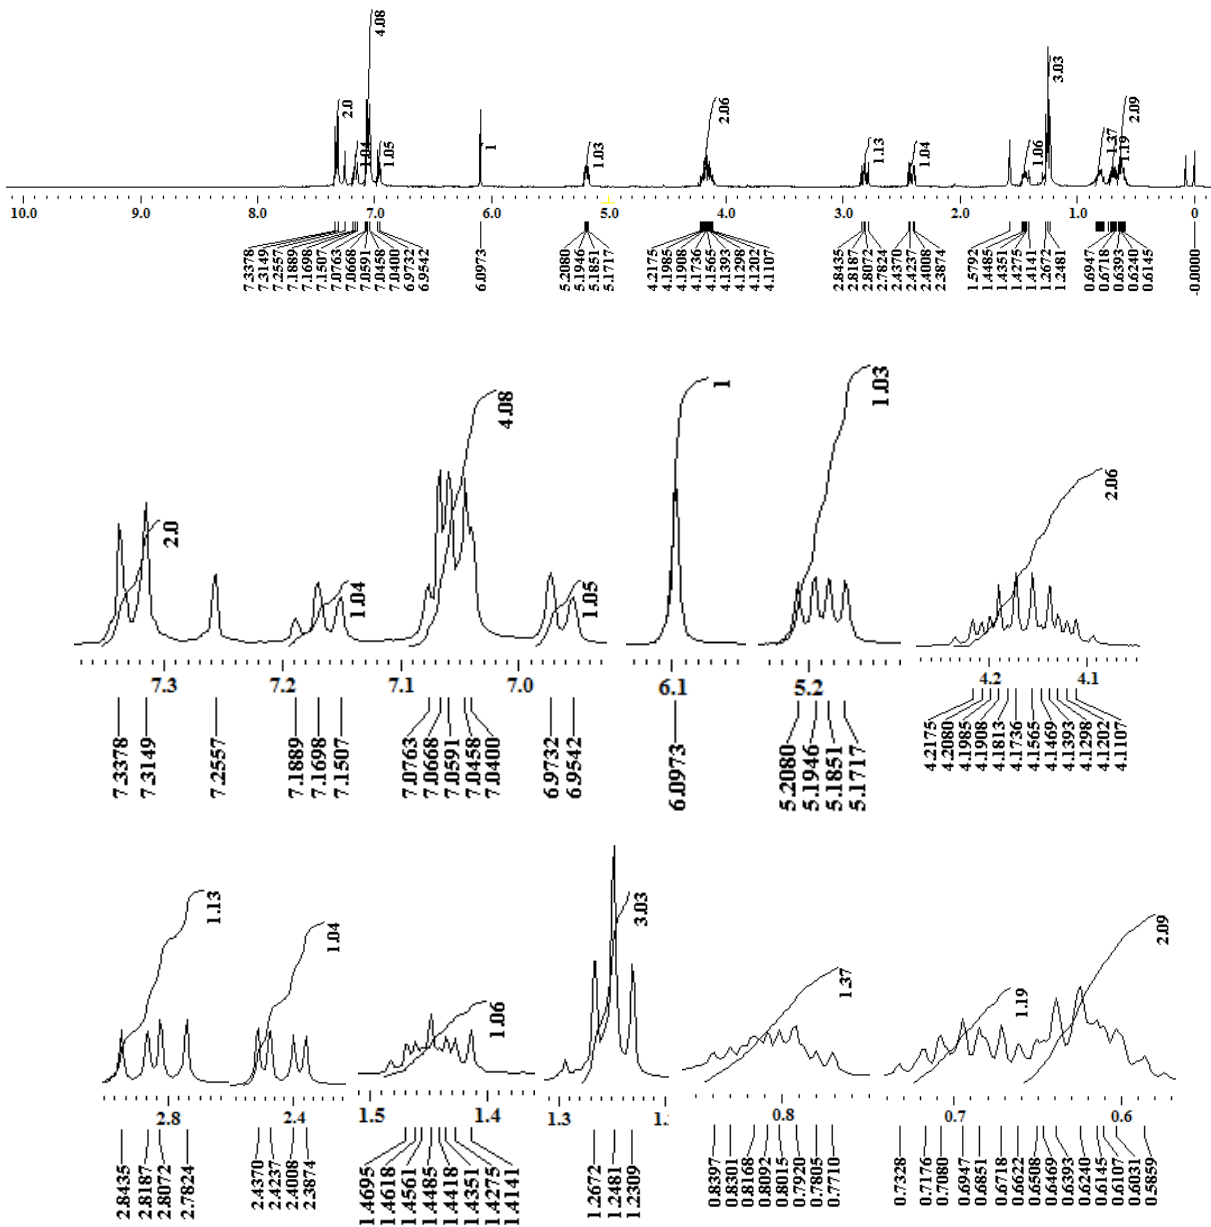

<sup>13</sup>C NMR in CDCl<sub>3</sub>

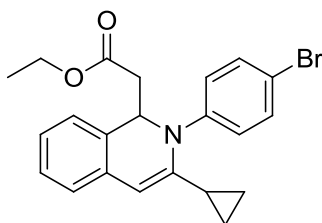

ethyl 2-(2-(4-bromophenyl)-3-cyclopropyl-1,2-dihydroisoquinolin-1-yl)acetate (**3g**)

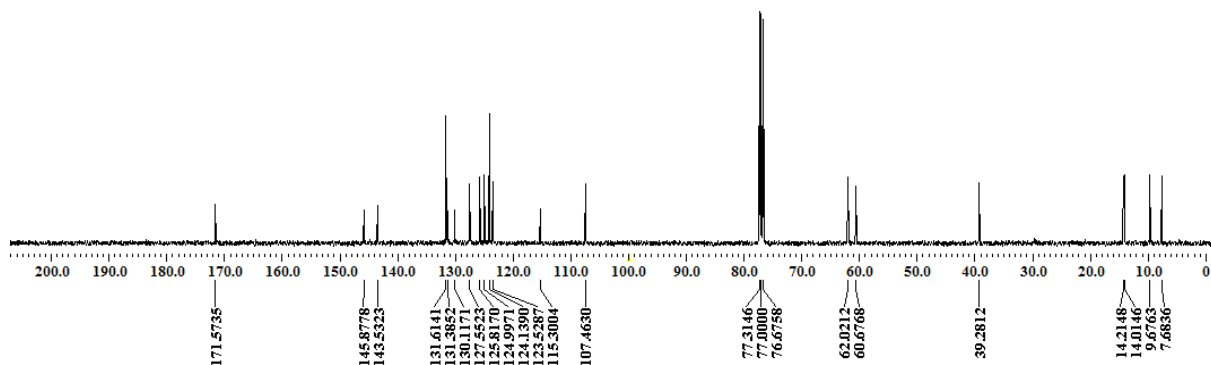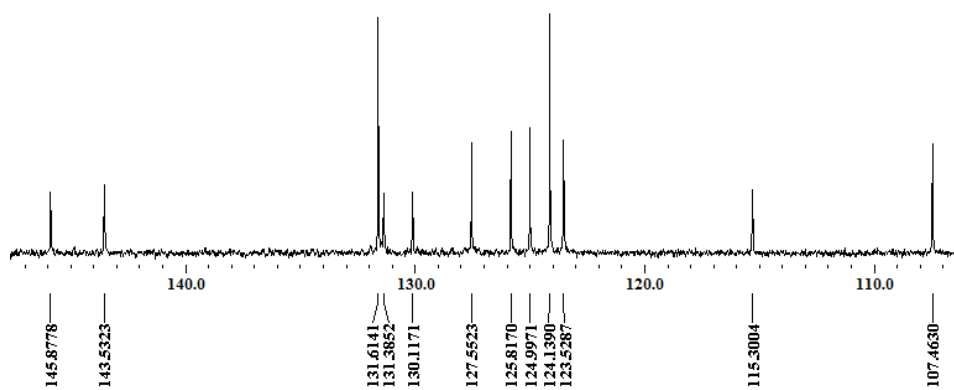

HRMS: Ethyl 2-(2-(4-bromophenyl)-3-cyclopropyl-1,2-dihydroisoquinolin-1-yl)acetate (**3g**)

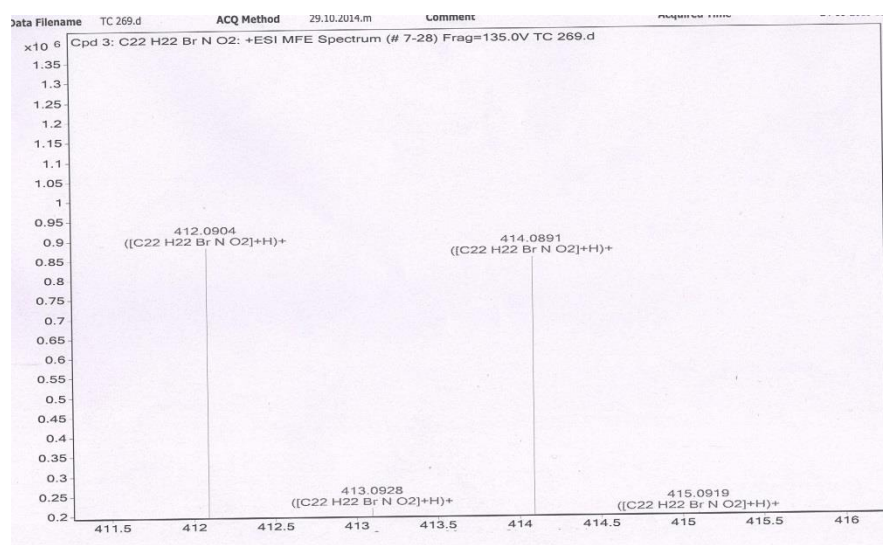



<sup>13</sup>C NMR in CDCl<sub>3</sub>

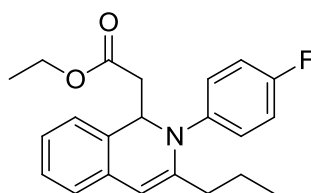

Ethyl 2-(2-(4-fluorophenyl)-3-propyl-1,2-dihydroisoquinolin-1-yl)acetate (**3h**)

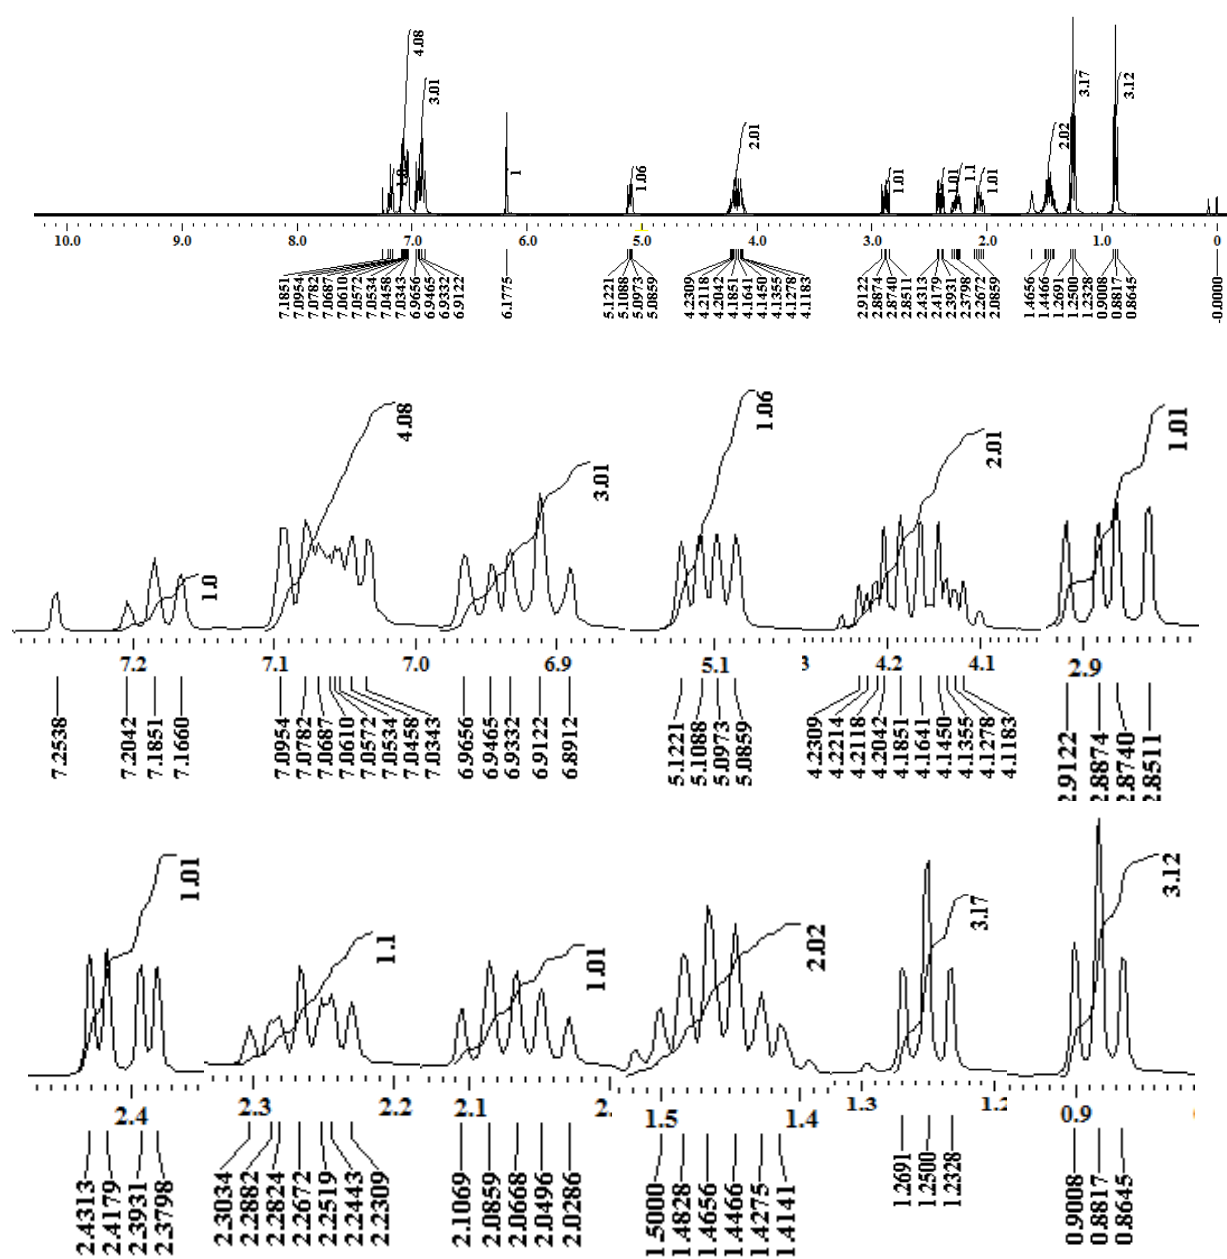

<sup>13</sup>C NMR in CDCl<sub>3</sub>

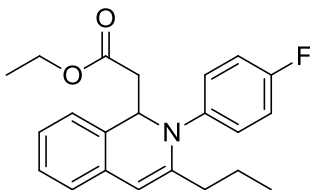

Ethyl 2-(2-(4-fluorophenyl)-3-propyl-1,2-dihydroisoquinolin-1-yl)acetate (**3h**)

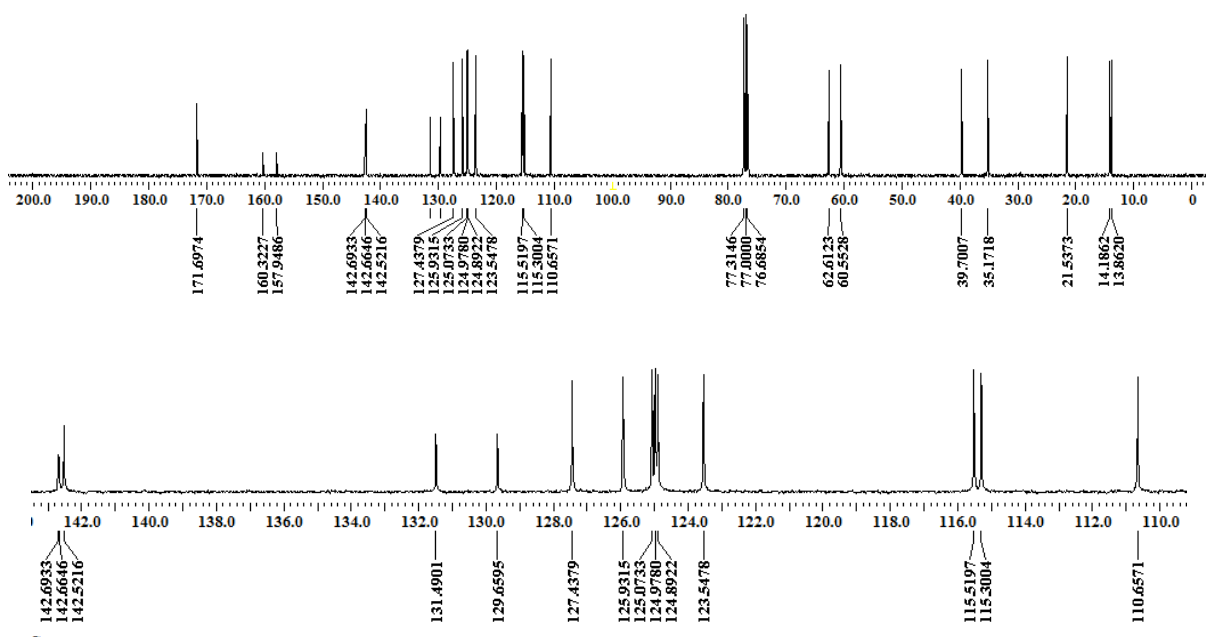

HRMS: Ethyl 2-(2-(4-fluorophenyl)-3-propyl-1,2-dihydroisoquinolin-1-yl)acetate (**3h**)

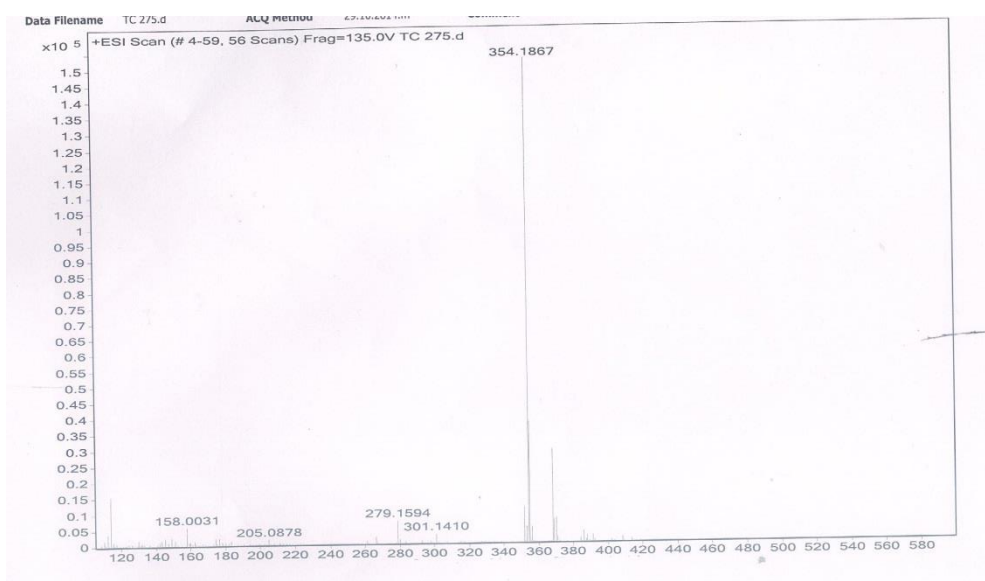

<sup>1</sup>H NMR in CDCl<sub>3</sub>

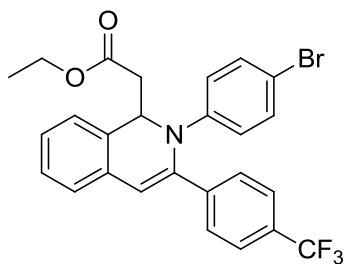

ethyl 2-(2-(4-bromophenyl)-3-(4-(trifluoromethyl)phenyl)-1,2-dihydroisoquinolin-1-yl)acetate (**3i**)

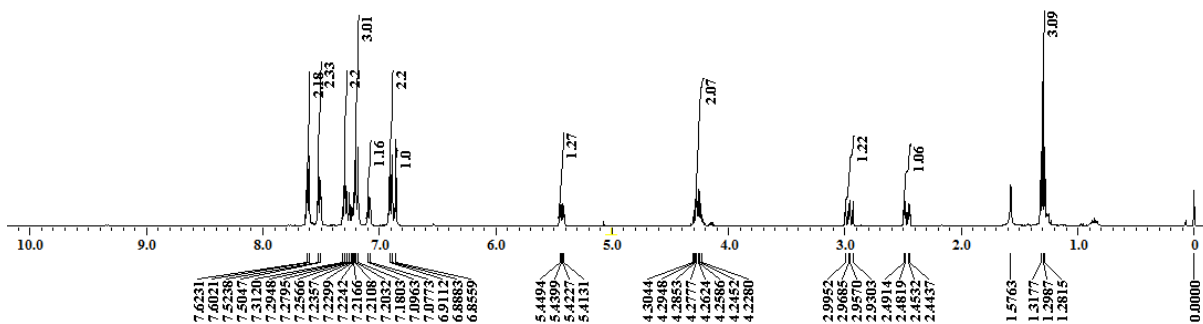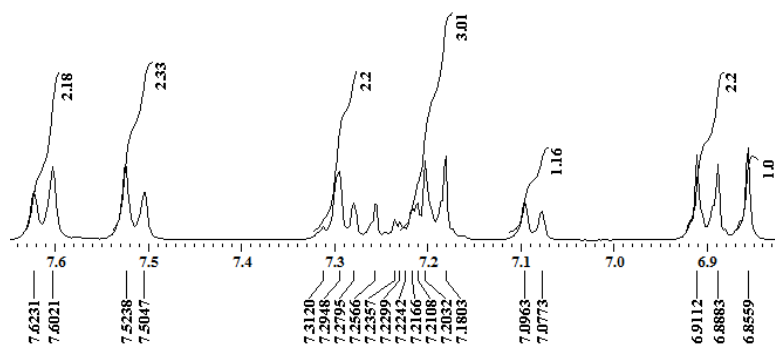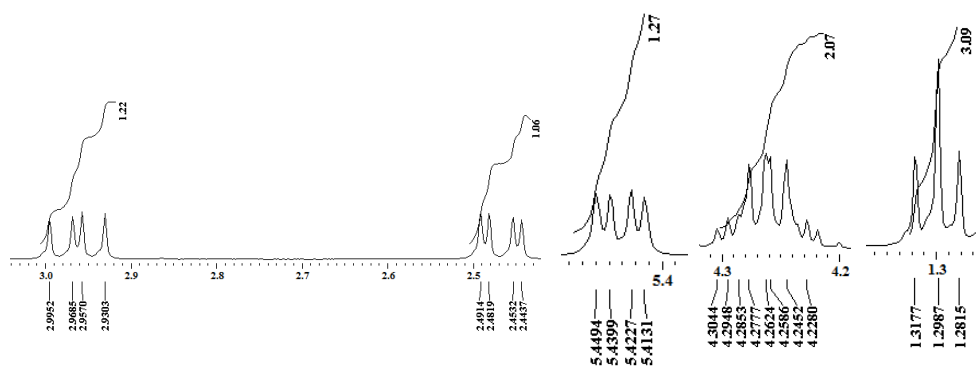

<sup>13</sup>C NMR in CDCl<sub>3</sub>

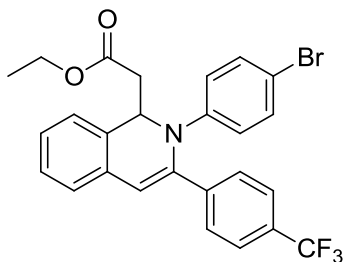

ethyl 2-(2-(4-bromophenyl)-3-(4-(trifluoromethyl)phenyl)-1,2-dihydroisoquinolin-1-yl)acetate (**3i**)

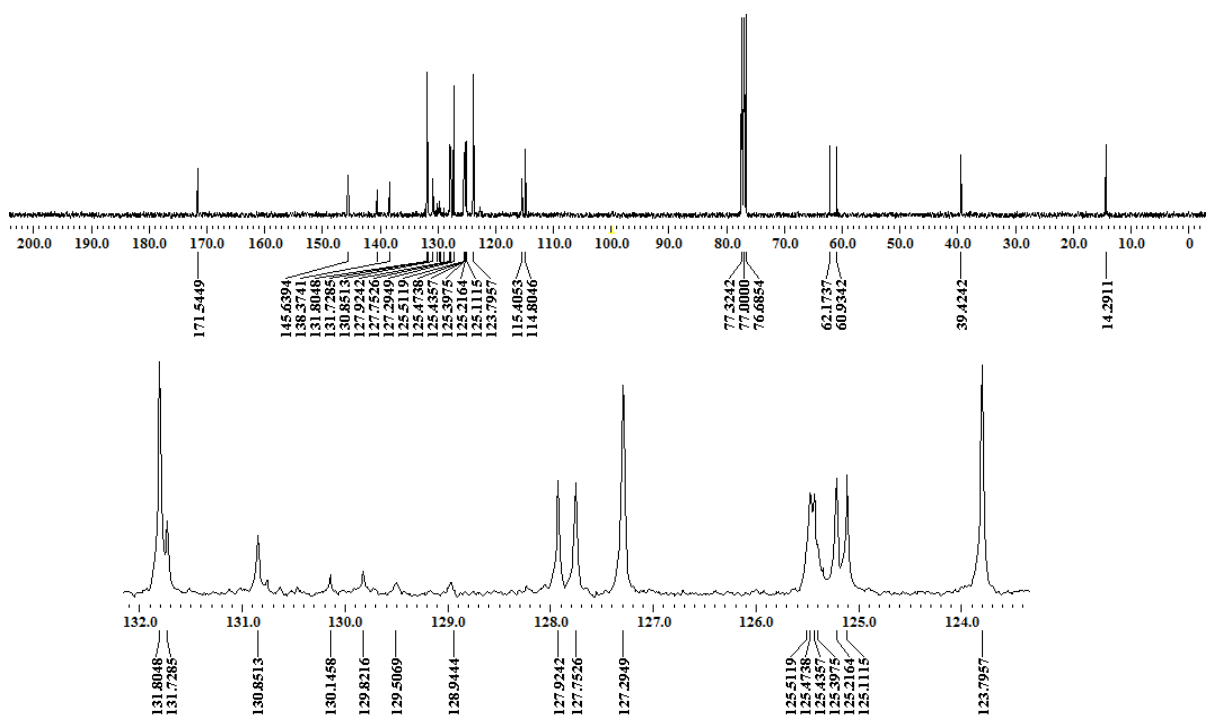

HRMS: Ethyl 2-(2-(4-bromophenyl)-3-(4-(trifluoromethyl)phenyl)-1,2-dihydroisoquinolin-1-yl)acetate (**3i**)

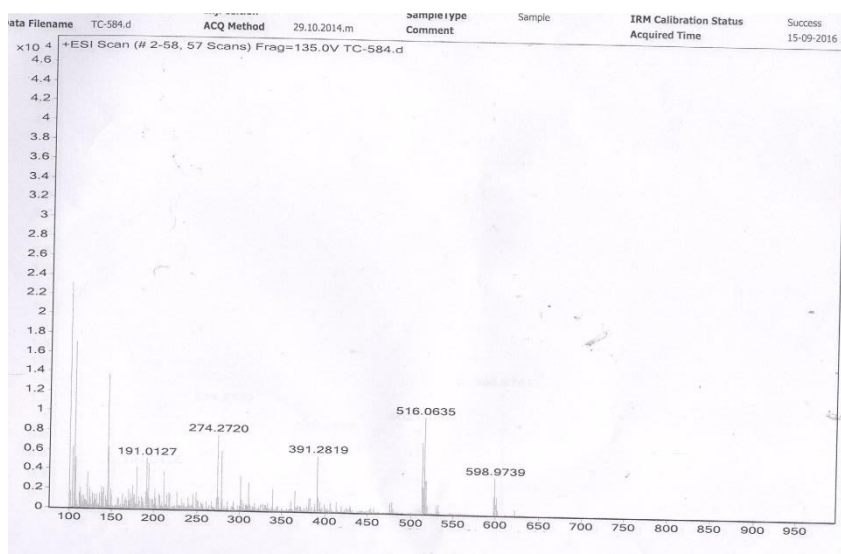

<sup>1</sup>H NMR in CDCl<sub>3</sub>

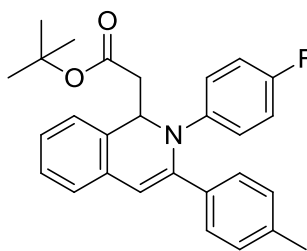

*tert*-Butyl 2-(2-(4-fluorophenyl)-3-(*p*-tolyl)-1,2-dihydroisoquinolin-1-yl)acetate (**3j**)

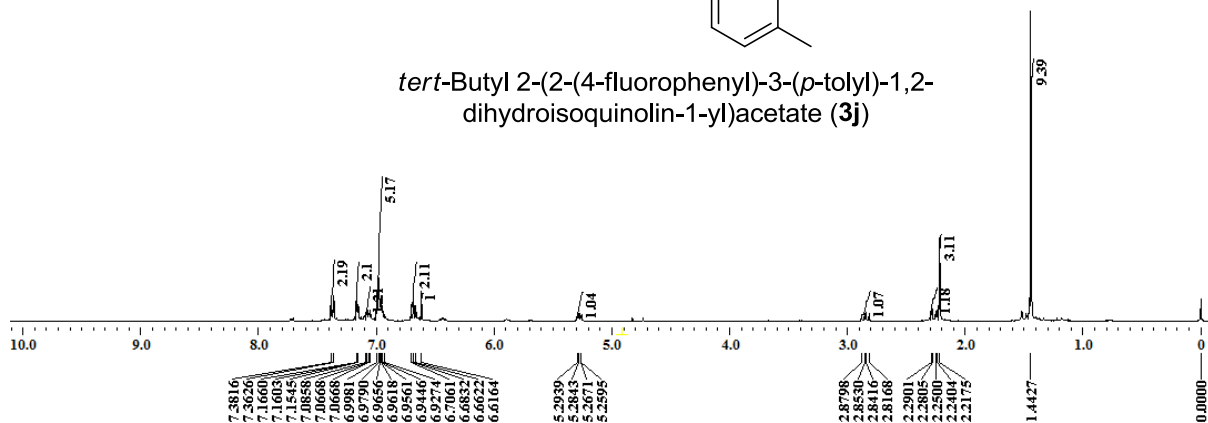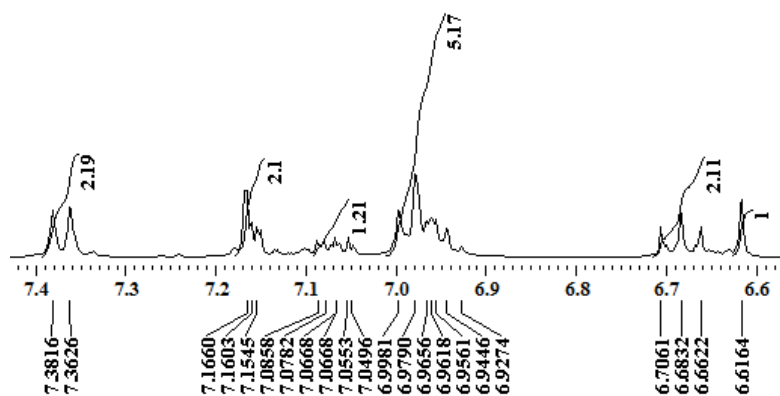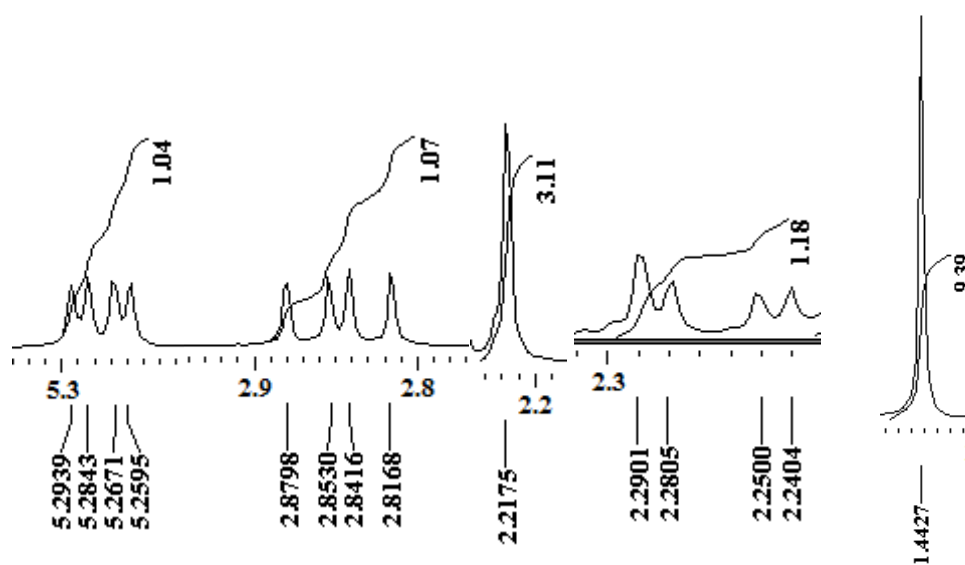

<sup>13</sup>C NMR in CDCl<sub>3</sub>

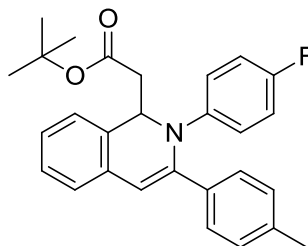

*tert*-Butyl 2-(2-(4-fluorophenyl)-3-(*p*-tolyl)-1,2-dihydroisoquinolin-1-yl)acetate (**3j**)

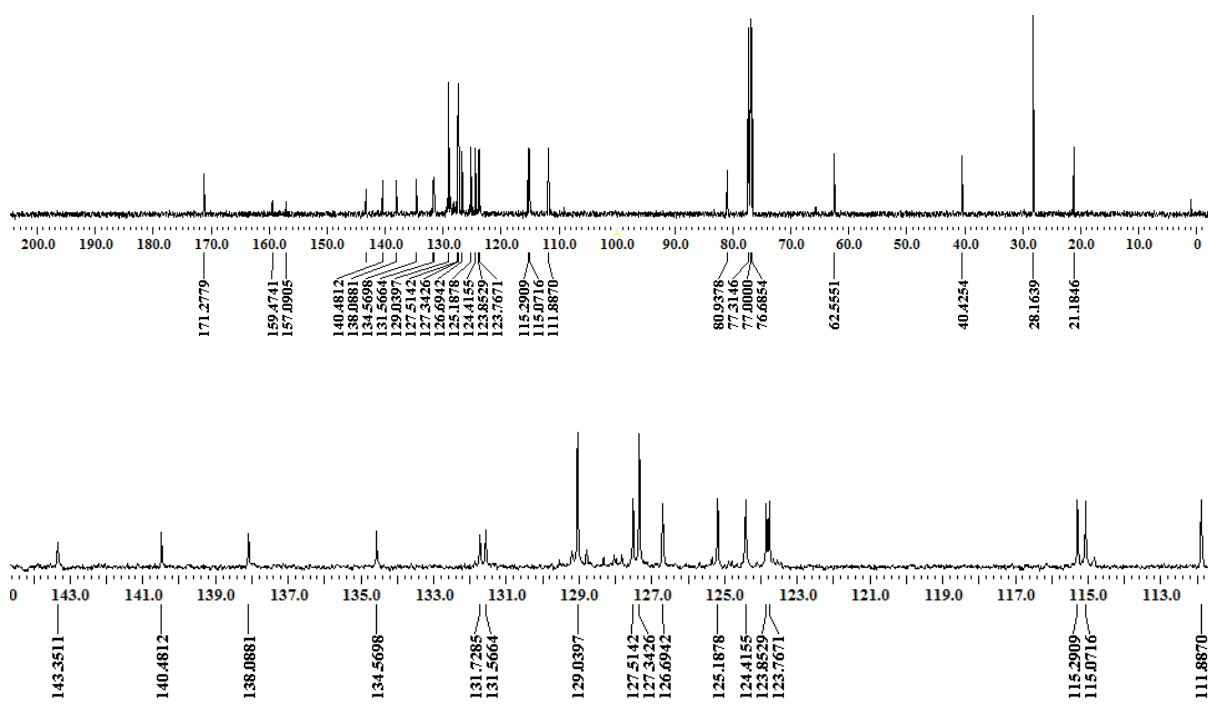

**HRMS:** *tert*-Butyl 2-(2-(4-fluorophenyl)-3-(*p*-tolyl)-1,2-dihydroisoquinolin-1-yl)acetate (**3j**)

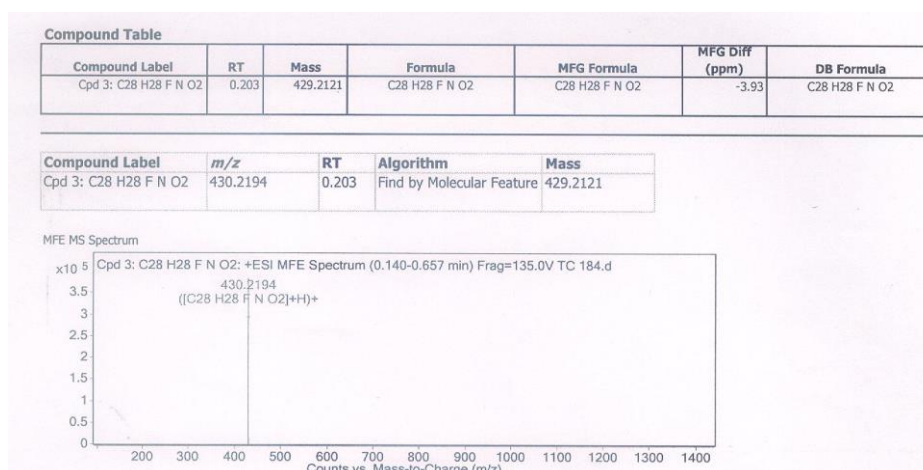

<sup>1</sup>H NMR in CDCl<sub>3</sub>

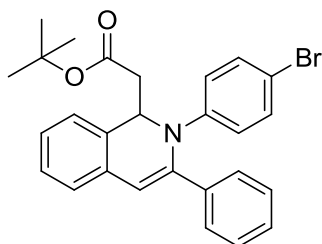

*tert*-Butyl 2-(2-(4-bromophenyl)-3-phenyl-1,2-dihydroisoquinolin-1-yl)acetate  
(3k)

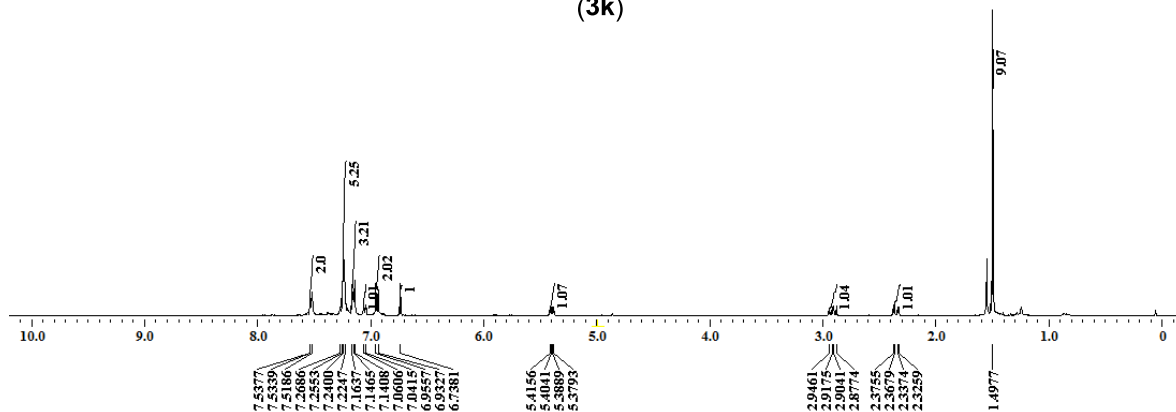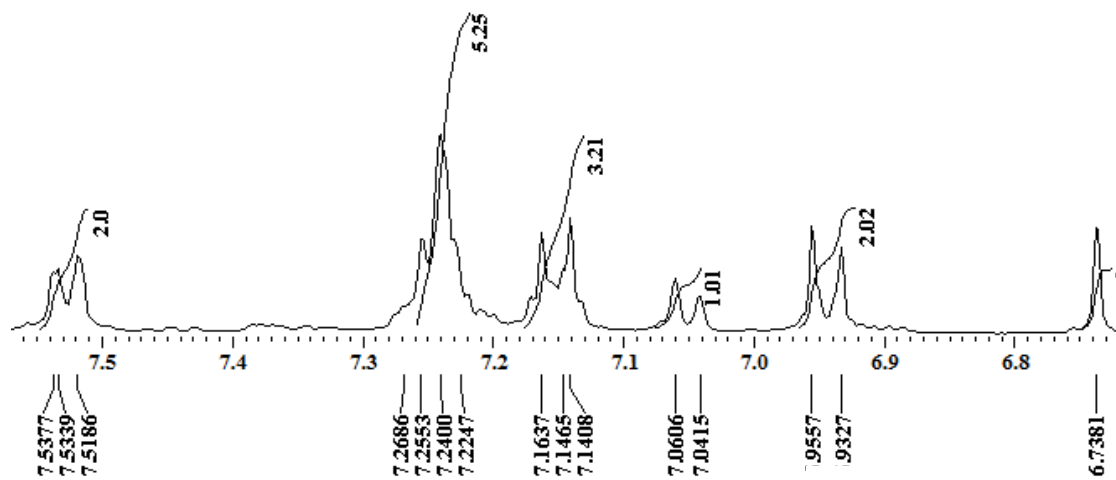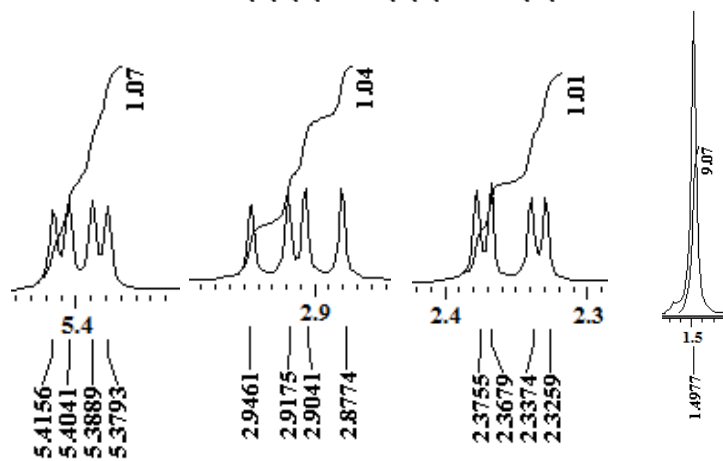

$^{13}\text{C}$  NMR in  $\text{CDCl}_3$

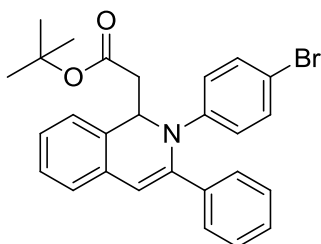

*tert*-Butyl 2-(2-(4-bromophenyl)-3-phenyl-1,2-dihydroisoquinolin-1-yl)acetate  
(**3k**)

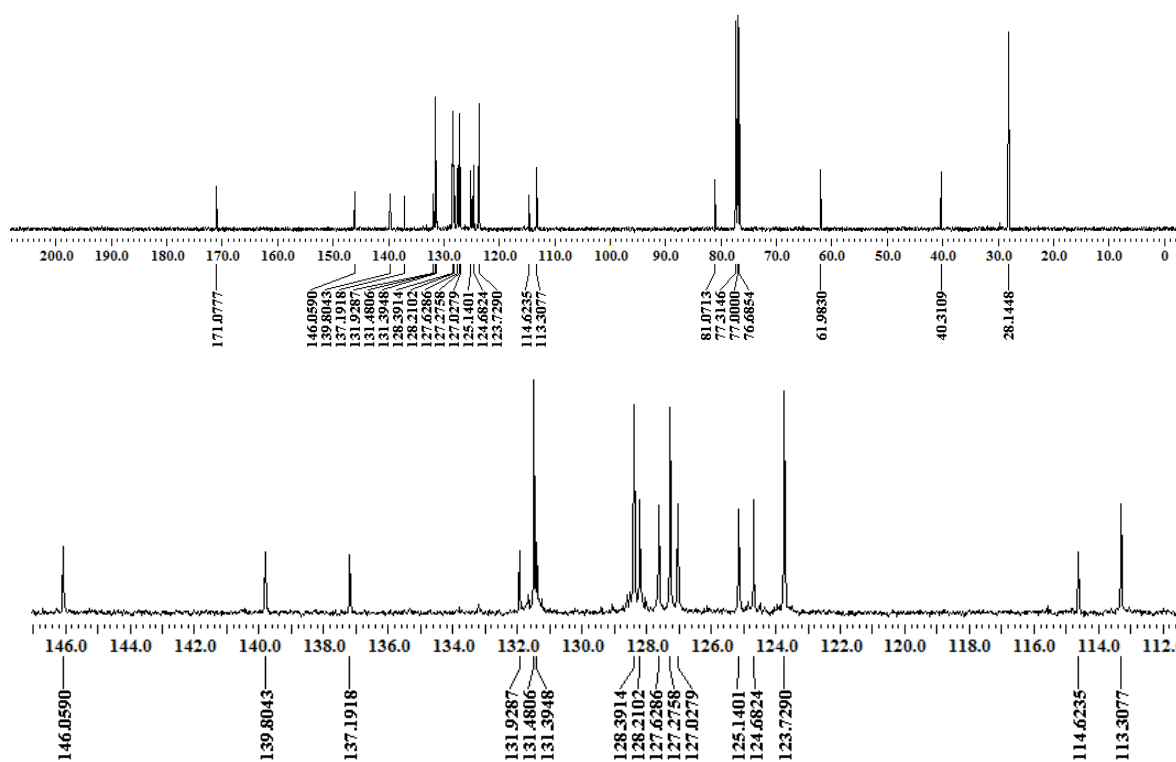

HRMS: *tert*-Butyl 2-(2-(4-bromophenyl)-3-phenyl-1,2-dihydroisoquinolin-1-yl)acetate (**3k**)

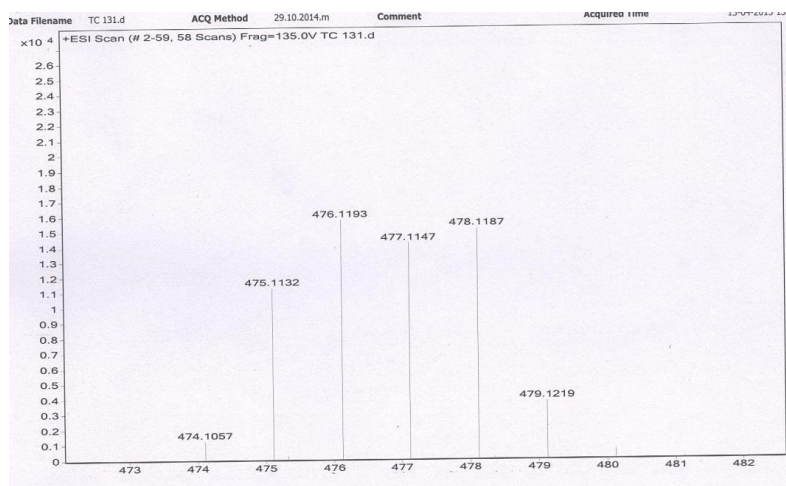



<sup>1</sup>H NMR in CDCl<sub>3</sub>

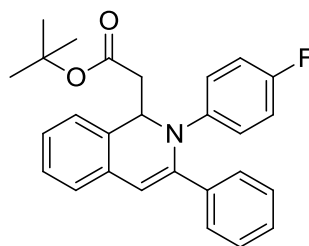

*tert*-Butyl 2-(2-(4-fluorophenyl)-3-phenyl-1,2-dihydroisoquinolin-1-yl)acetate (**31**)

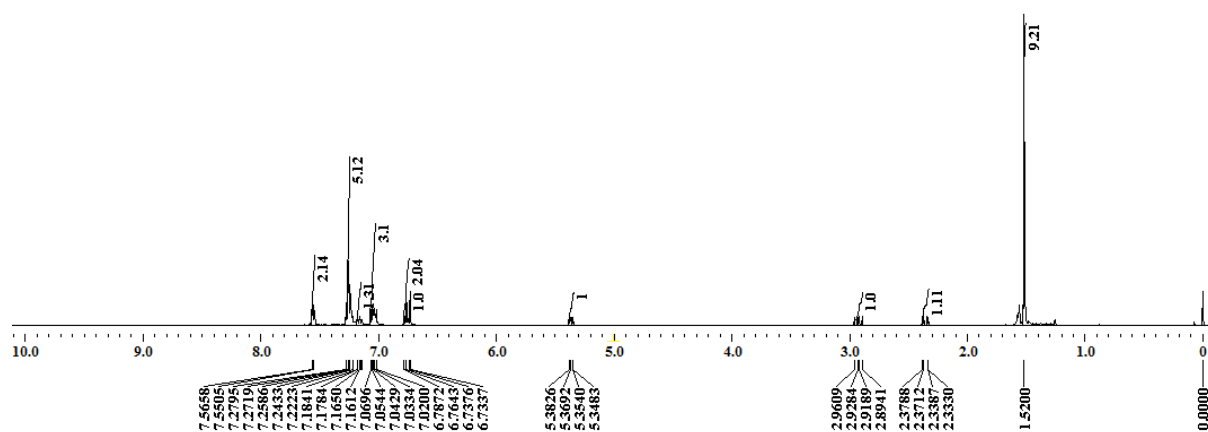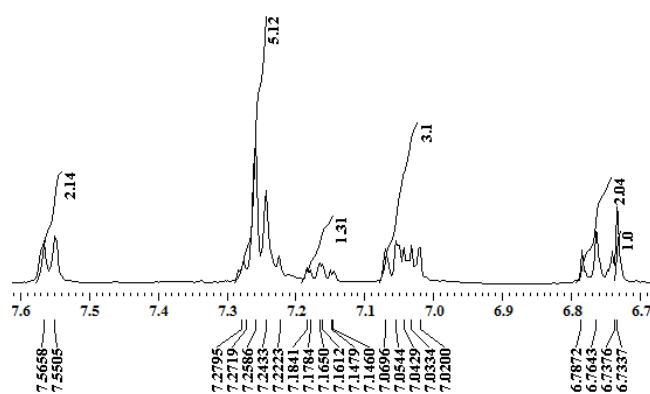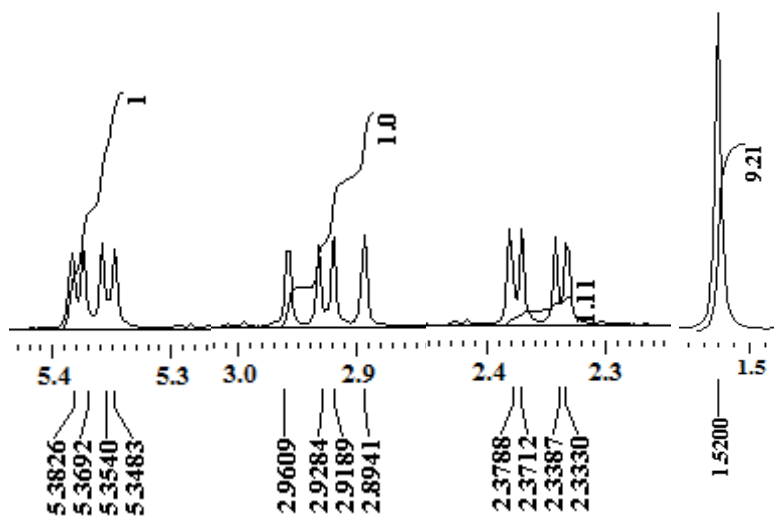

<sup>13</sup>C NMR in CDCl<sub>3</sub>

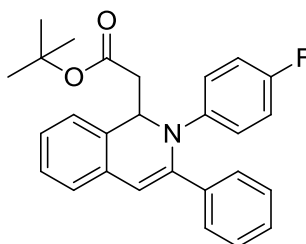

*tert*-Butyl 2-(2-(4-fluorophenyl)-3-phenyl-1,2-dihydroisoquinolin-1-yl)acetate (**31**)

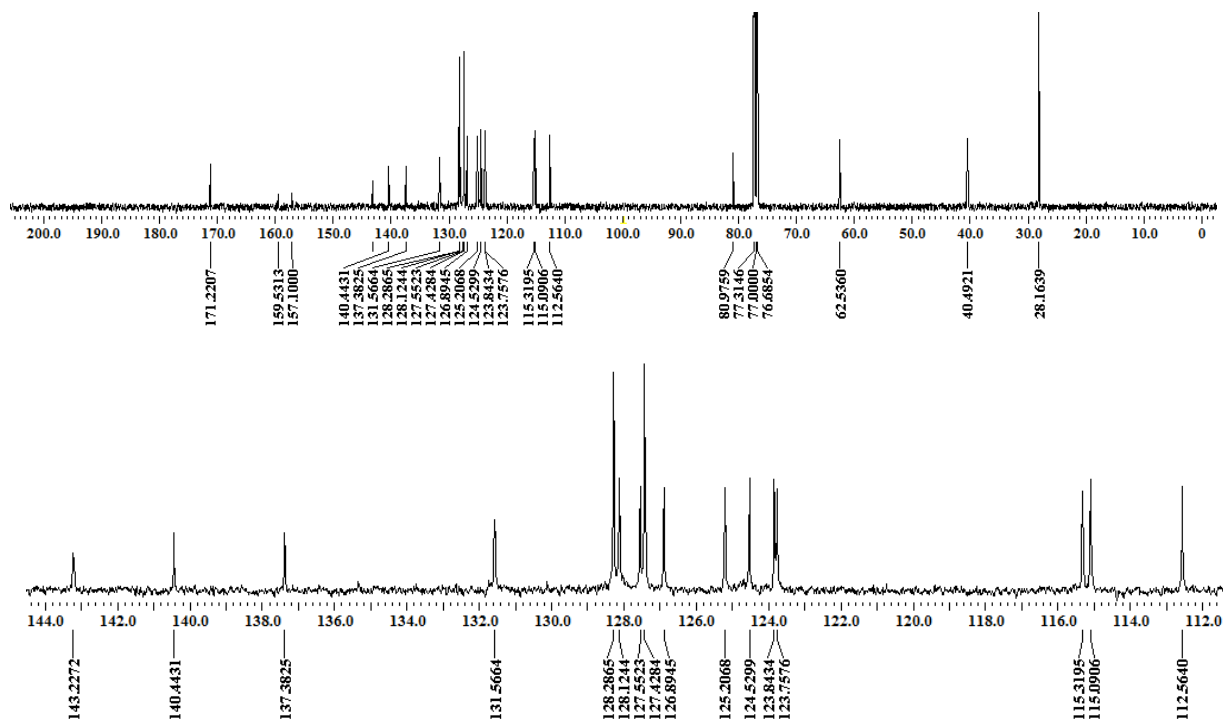

**HRMS:** *tert*-Butyl 2-(2-(4-fluorophenyl)-3-phenyl-1,2-dihydroisoquinolin-1-yl)acetate (**31**)

Compound Table

| Compound Label                                            | RT    | Mass     | Formula                                            | MFG Formula                                        | MFG Diff (ppm) | DB Formula                                         |
|-----------------------------------------------------------|-------|----------|----------------------------------------------------|----------------------------------------------------|----------------|----------------------------------------------------|
| Cpd 1: C <sub>27</sub> H <sub>26</sub> F N O <sub>2</sub> | 0.203 | 415.1953 | C <sub>27</sub> H <sub>26</sub> F N O <sub>2</sub> | C <sub>27</sub> H <sub>26</sub> F N O <sub>2</sub> | -1.33          | C <sub>27</sub> H <sub>26</sub> F N O <sub>2</sub> |

| Compound Label                                            | m/z      | RT    | Algorithm                 | Mass     |
|-----------------------------------------------------------|----------|-------|---------------------------|----------|
| Cpd 1: C <sub>27</sub> H <sub>26</sub> F N O <sub>2</sub> | 416.2036 | 0.203 | Find by Molecular Feature | 415.1953 |

MFE MS Spectrum

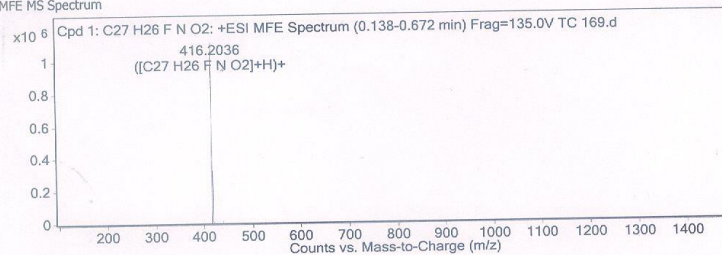

<sup>1</sup>H NMR in CDCl<sub>3</sub>

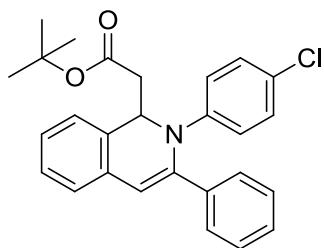

*tert*-Butyl 2-(2-(4-chlorophenyl)-3-phenyl-1,2-dihydroisoquinolin-1-yl)acetate (**3m**)

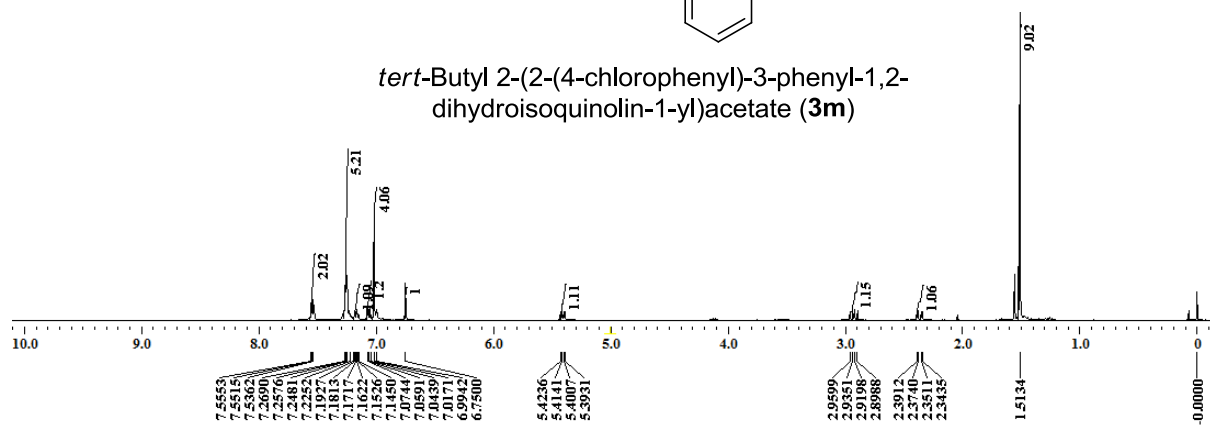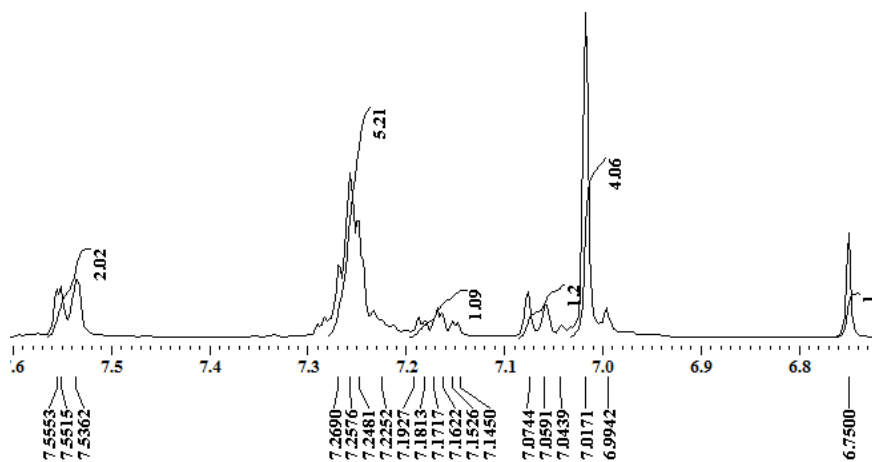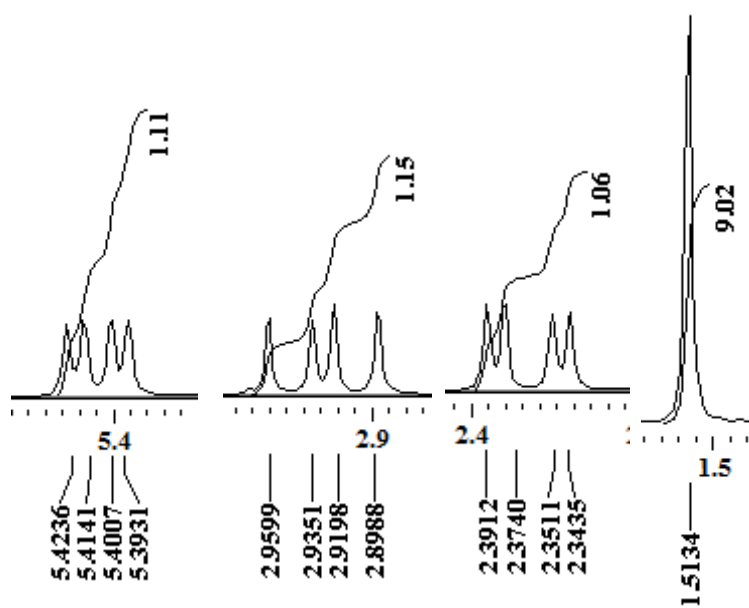

<sup>13</sup>C NMR in CDCl<sub>3</sub>

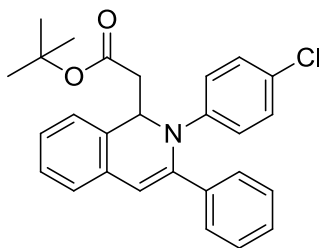

*tert*-Butyl 2-(2-(4-chlorophenyl)-3-phenyl-1,2-dihydroisoquinolin-1-yl)acetate (**3m**)

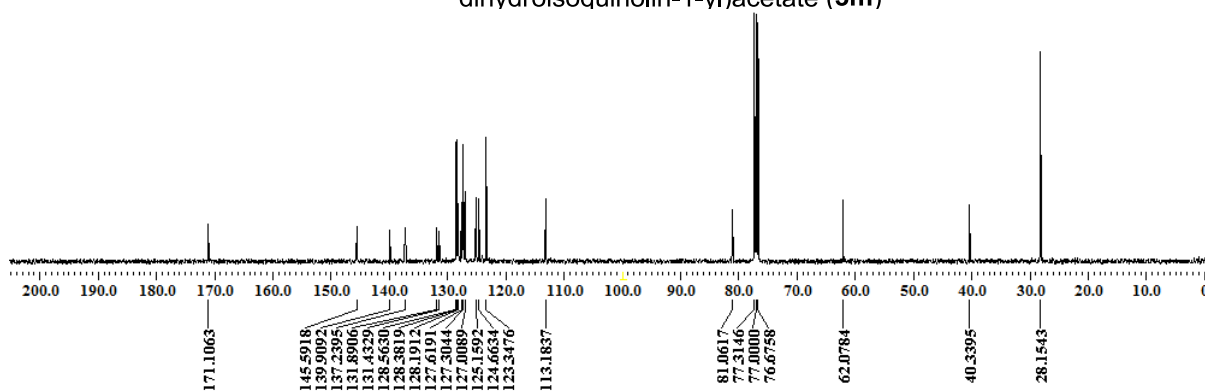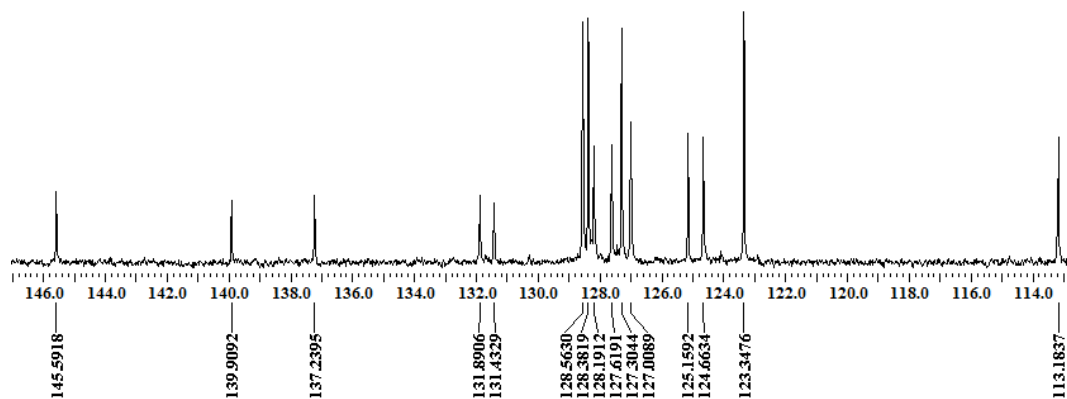

**HRMS:** *tert*-Butyl 2-(2-(4-chlorophenyl)-3-phenyl-1,2-dihydroisoquinolin-1-yl)acetate (**3m**)

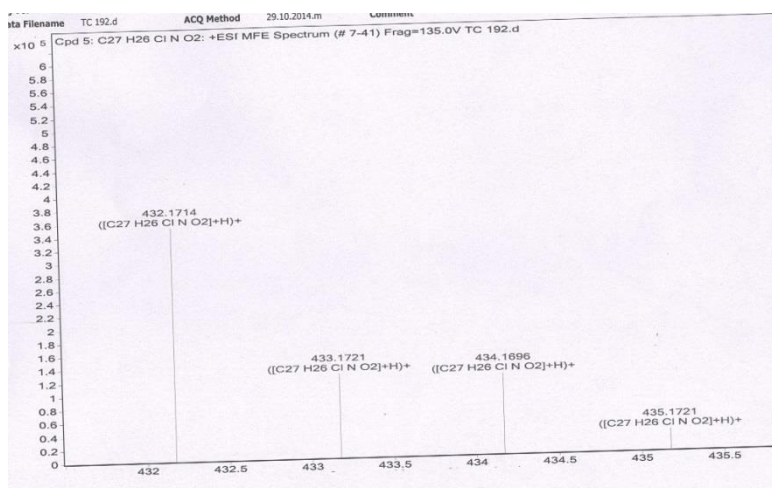

<sup>1</sup>H NMR in CDCl<sub>3</sub>

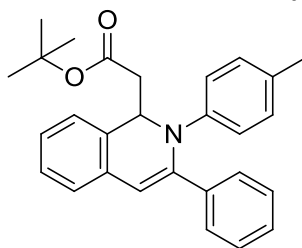

*tert*-Butyl 2-(3-phenyl-2-(*p*-tolyl)-1,2-dihydroisoquinolin-1-yl)acetate (**3n**)

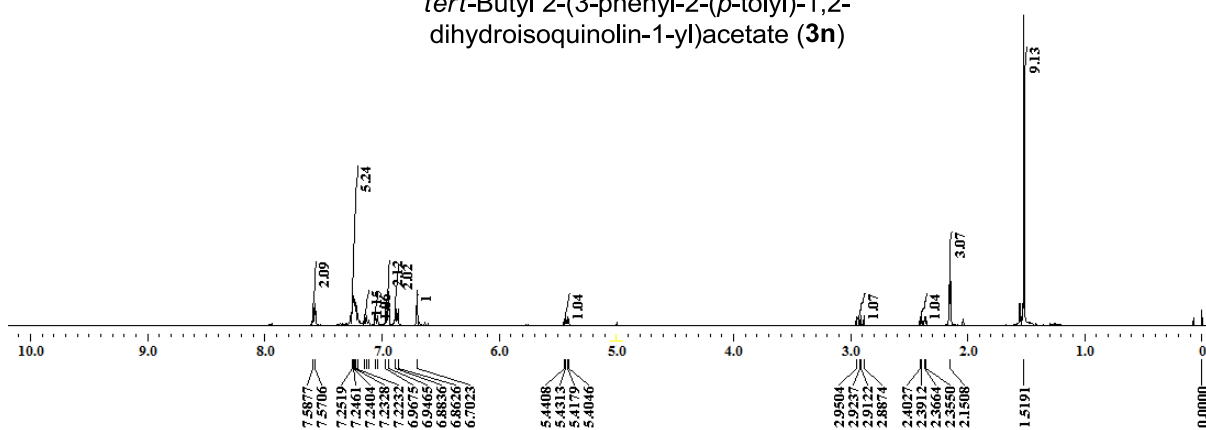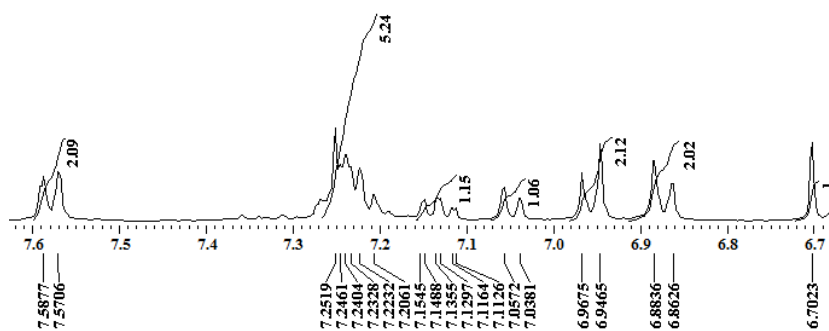

]

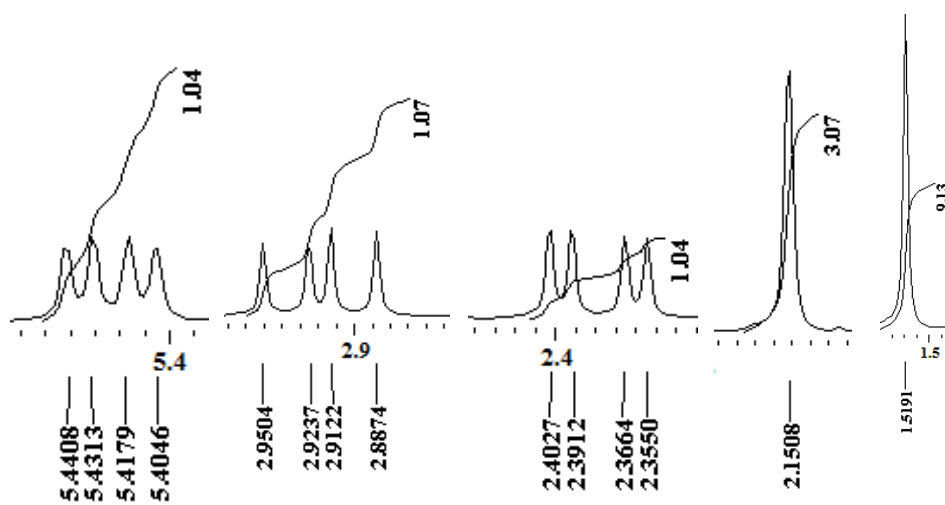

<sup>13</sup>C NMR in CDCl<sub>3</sub>

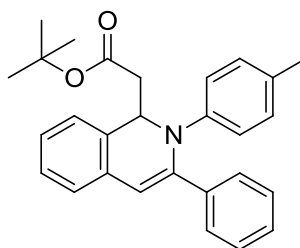

*tert*-Butyl 2-(3-phenyl-2-(*p*-tolyl)-1,2-dihydroisoquinolin-1-yl)acetate (**3n**)

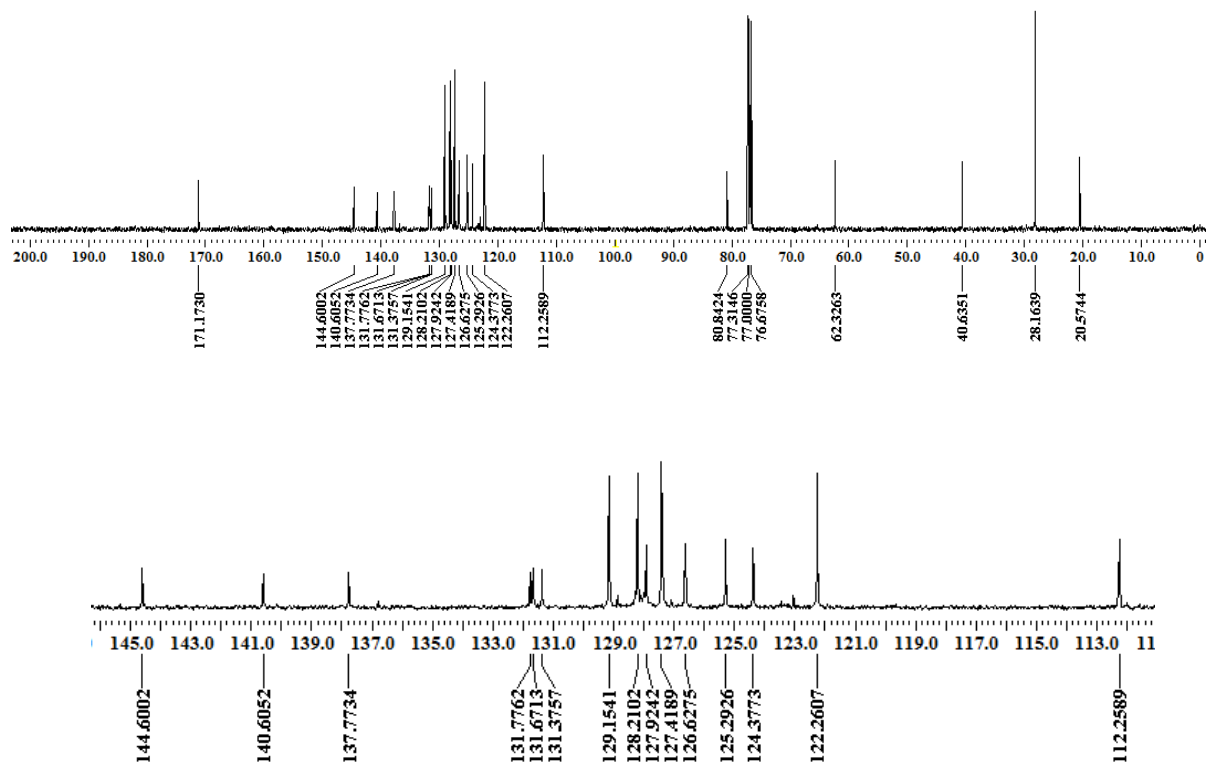

HRMS: *tert*-Butyl 2-(3-phenyl-2-(*p*-tolyl)-1,2-dihydroisoquinolin-1-yl)acetate (**3n**)

Compound Table

| Compound Label                                          | RT    | Mass     | Formula                                          | MFG Formula                                      | MFG Diff (ppm) | DB Formula                                       |
|---------------------------------------------------------|-------|----------|--------------------------------------------------|--------------------------------------------------|----------------|--------------------------------------------------|
| Cpd 1: C <sub>28</sub> H <sub>29</sub> N O <sub>2</sub> | 0.202 | 411.2205 | C <sub>28</sub> H <sub>29</sub> N O <sub>2</sub> | C <sub>28</sub> H <sub>29</sub> N O <sub>2</sub> | -1.51          | C <sub>28</sub> H <sub>29</sub> N O <sub>2</sub> |

| Compound Label                                          | <i>m/z</i> | RT    | Algorithm                 | Mass     |
|---------------------------------------------------------|------------|-------|---------------------------|----------|
| Cpd 1: C <sub>28</sub> H <sub>29</sub> N O <sub>2</sub> | 412.2276   | 0.202 | Find by Molecular Feature | 411.2205 |

MFE MS Spectrum

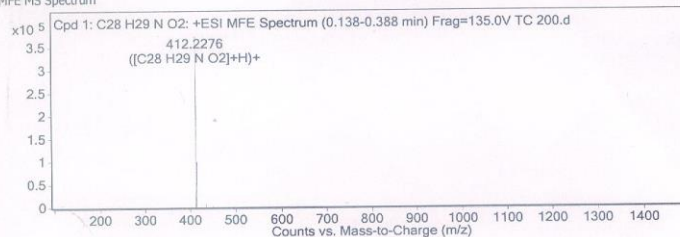

MFE MS Zoomed Spectrum

<sup>1</sup>H NMR in CDCl<sub>3</sub>

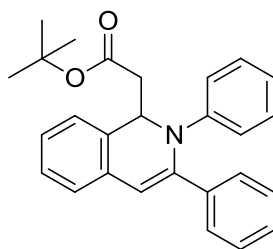

*tert*-Butyl 2-(2,3-diphenyl-1,2-dihydroisoquinolin-1-yl)acetate (**3o**)

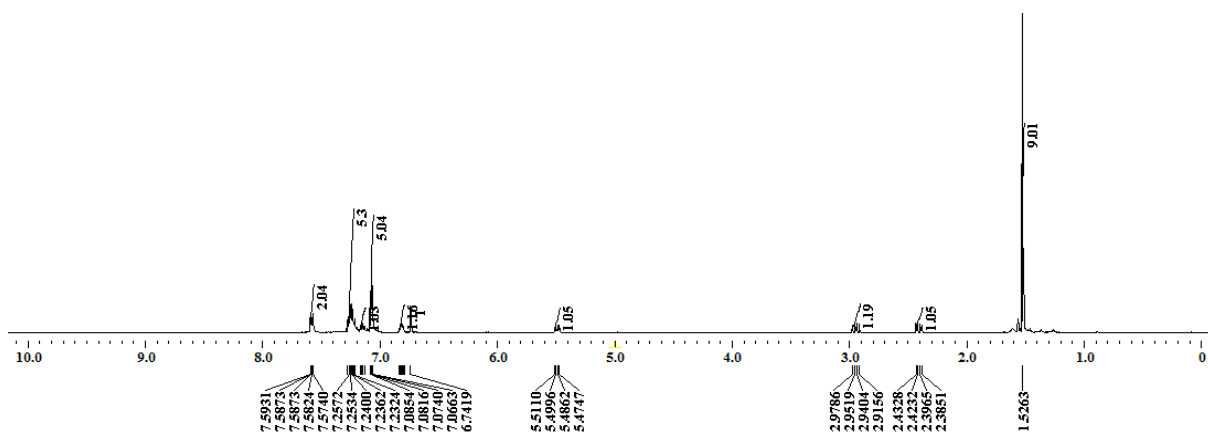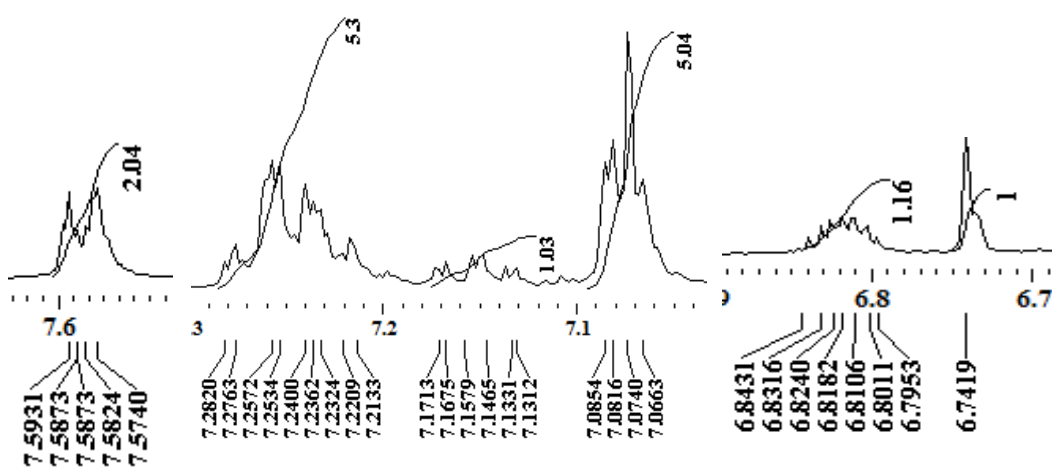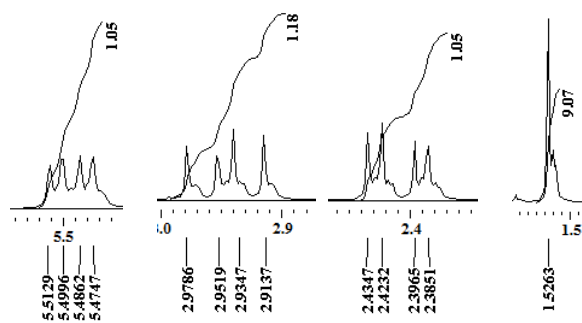

<sup>13</sup>C NMR in CDCl<sub>3</sub>

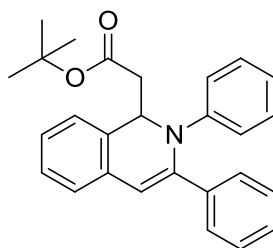

*tert*-Butyl 2-(2,3-diphenyl-1,2-dihydroisoquinolin-1-yl)acetate (**3o**)

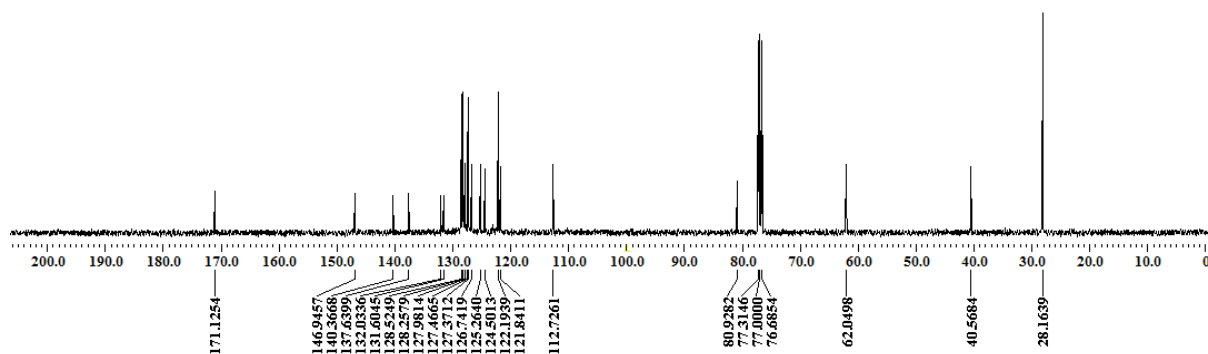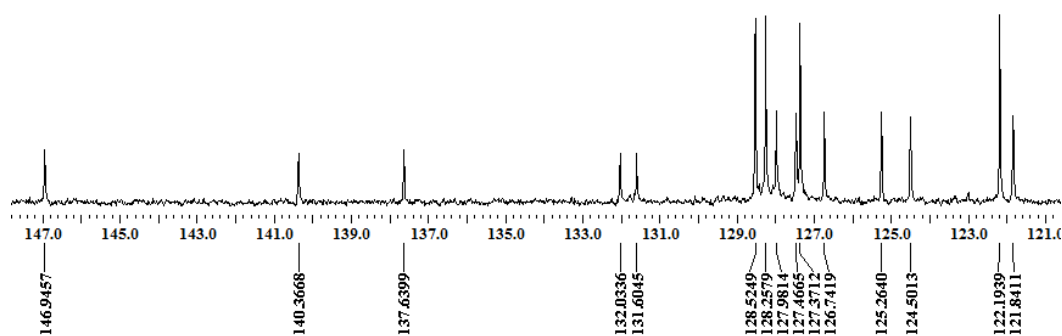

**HRMS:** *tert*-Butyl 2-(2,3-diphenyl-1,2-dihydroisoquinolin-1-yl)acetate (**3o**)

Compound Table

| Compound Label      | RT    | Mass     | Formula      | MFG Formula  | MFG Diff (ppm) | DB Formula   |
|---------------------|-------|----------|--------------|--------------|----------------|--------------|
| Cpd 2: C27 H27 N O2 | 0.205 | 397.2043 | C27 H27 N O2 | C27 H27 N O2 | -0.29          | C27 H27 N O2 |

| Compound Label      | <i>m/z</i> | RT    | Algorithm                 | Mass     |
|---------------------|------------|-------|---------------------------|----------|
| Cpd 2: C27 H27 N O2 | 398.2116   | 0.205 | Find by Molecular Feature | 397.2043 |

MFE MS Spectrum

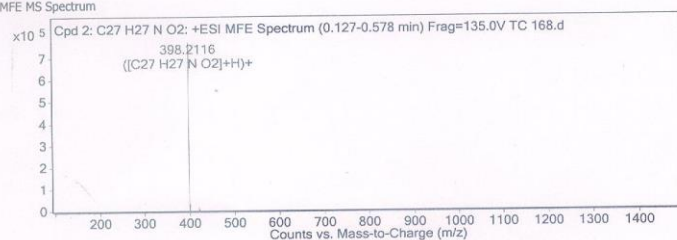



<sup>1</sup>H NMR in CDCl<sub>3</sub>

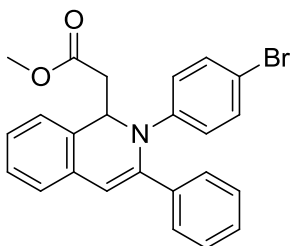

Methyl 2-(2-(4-bromophenyl)-3-phenyl-1,2-dihydroisoquinolin-1-yl)acetate (**3p**)

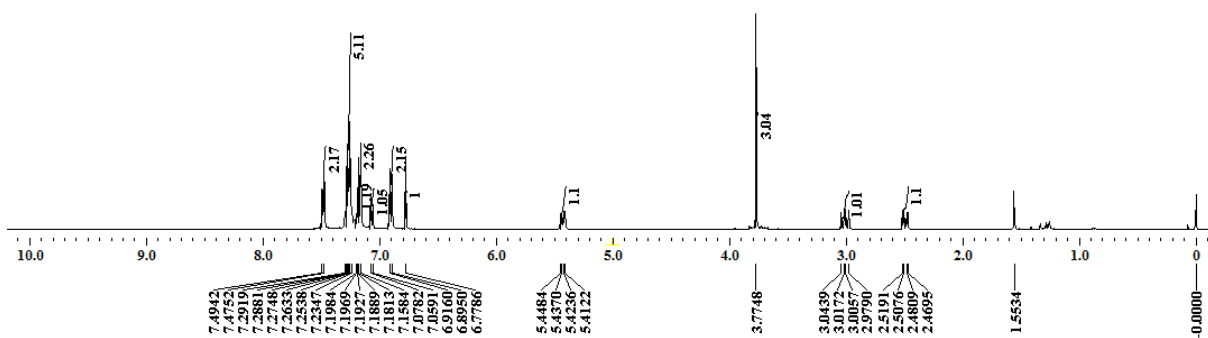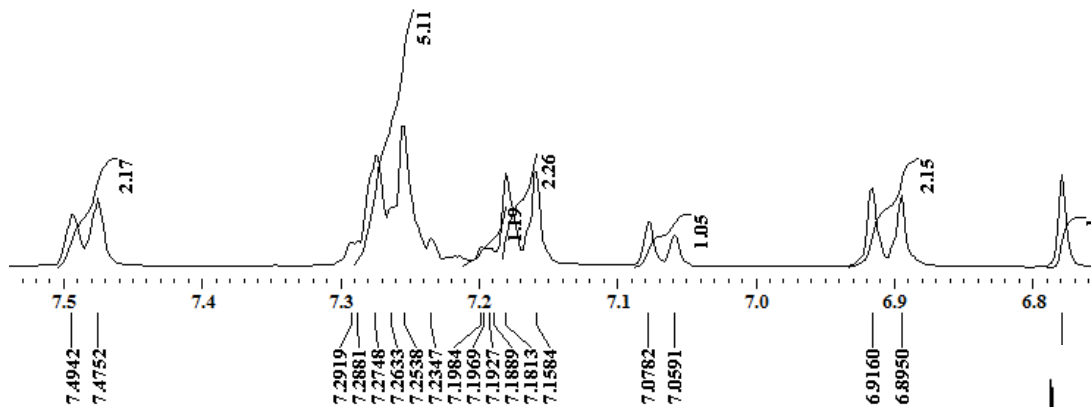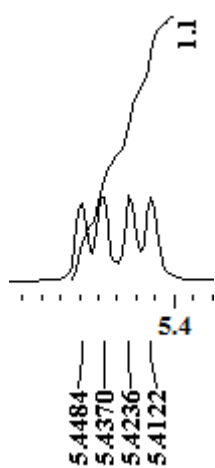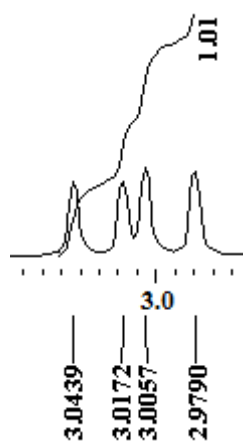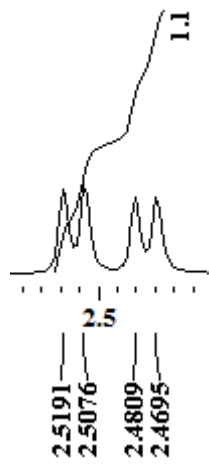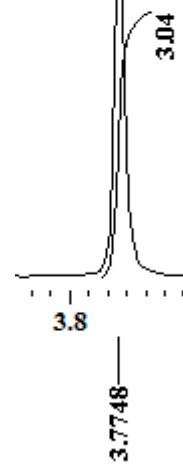

$^{13}\text{C}$  NMR in  $\text{CDCl}_3$

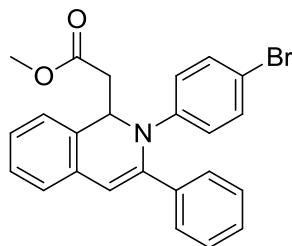

Methyl 2-(2-(4-bromophenyl)-3-phenyl-1,2-dihydro-isoquinolin-1-yl)acetate (**3p**)

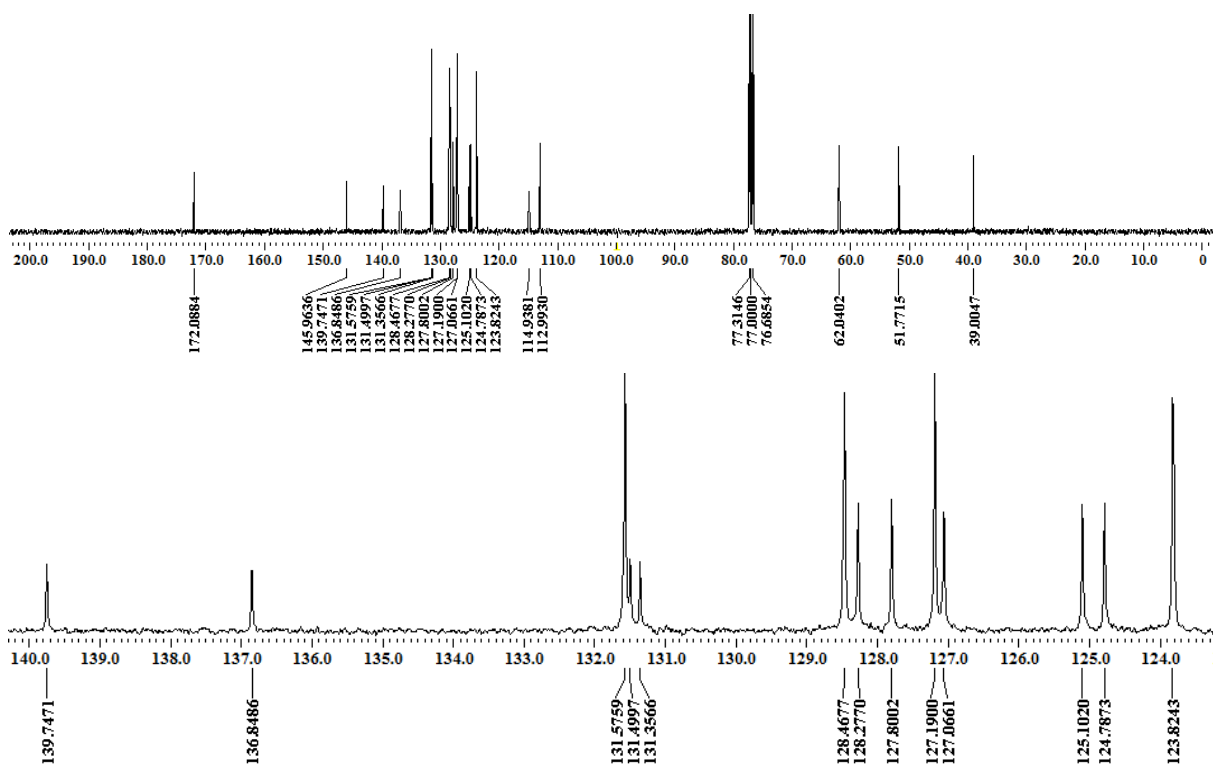

HRMS: Methyl 2-(2-(4-bromophenyl)-3-phenyl-1,2-dihydro-isoquinolin-1-yl)acetate (**3p**)

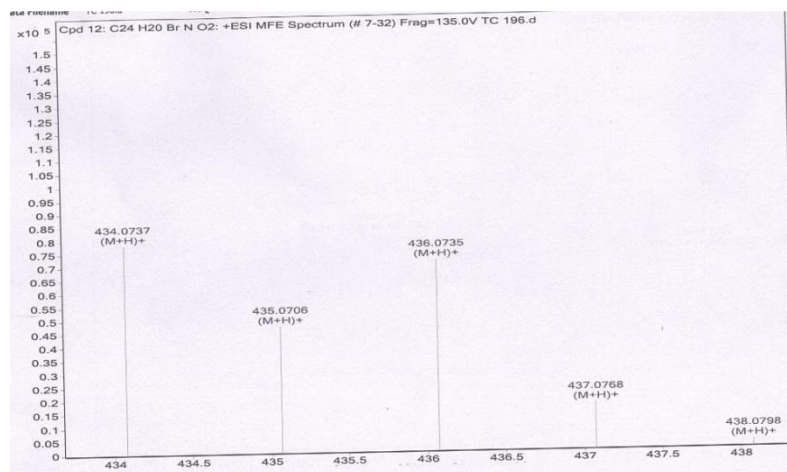

<sup>1</sup>H NMR in CDCl<sub>3</sub>

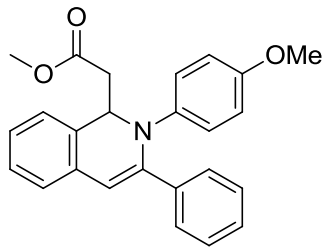

Methyl 2-(2-(4-methoxyphenyl)-3-phenyl-1,2-dihydroisoquinolin-1-yl)acetate (**3q**)

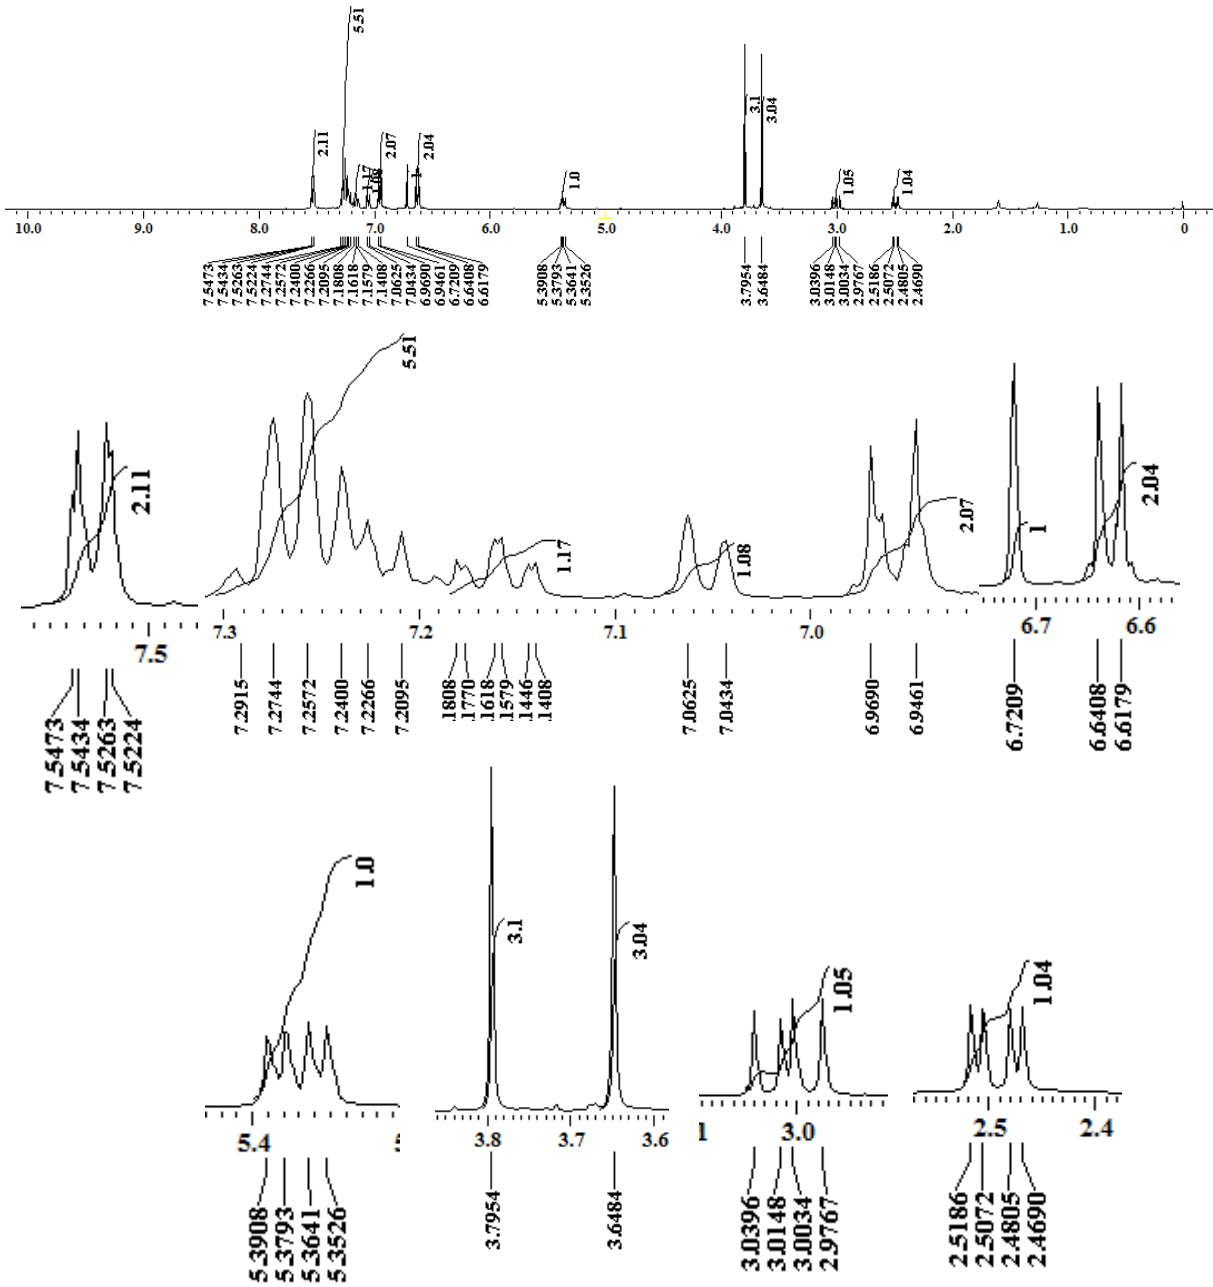

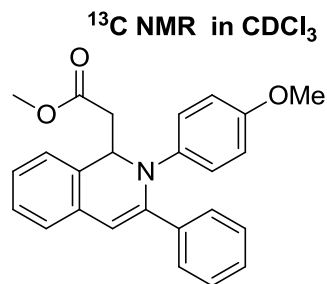

Methyl 2-(2-(4-methoxyphenyl)-3-phenyl-1,2-dihydroisoquinolin-1-yl)acetate (**3q**)

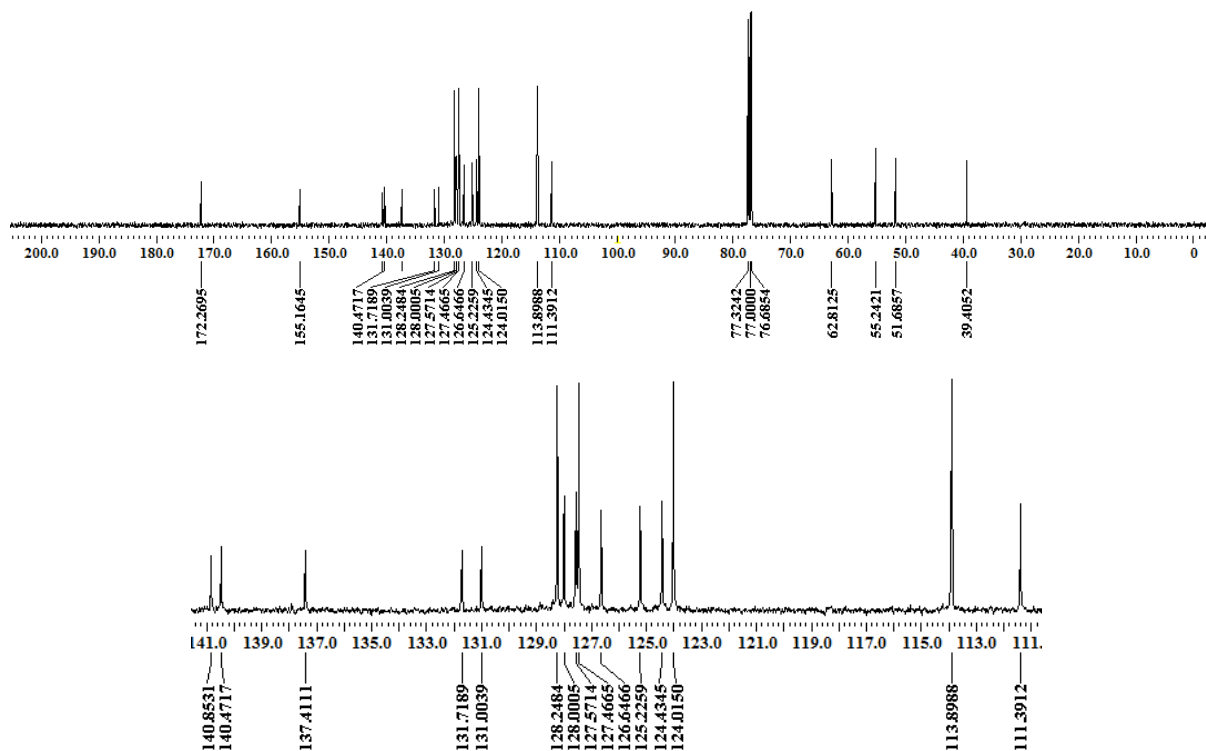

HRMS: Methyl 2-(2-(4-methoxyphenyl)-3-phenyl-1,2-dihydroisoquinolin-1-yl)acetate (**3q**)

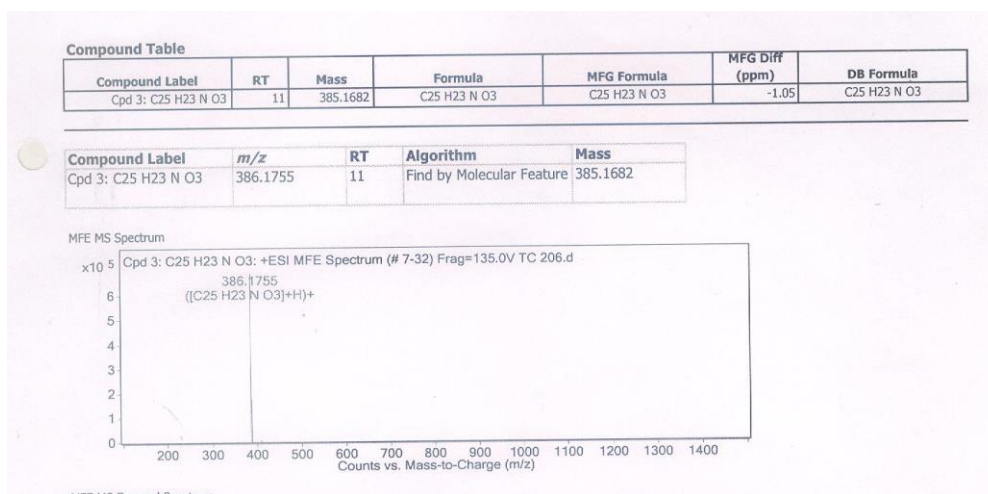

<sup>1</sup>H NMR in CDCl<sub>3</sub>

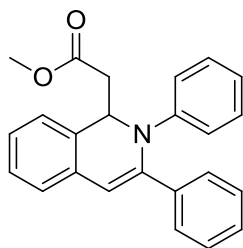

Methyl 2-(2,3-diphenyl-1,2-dihydroisoquinolin-1-yl)acetate (**3r**)

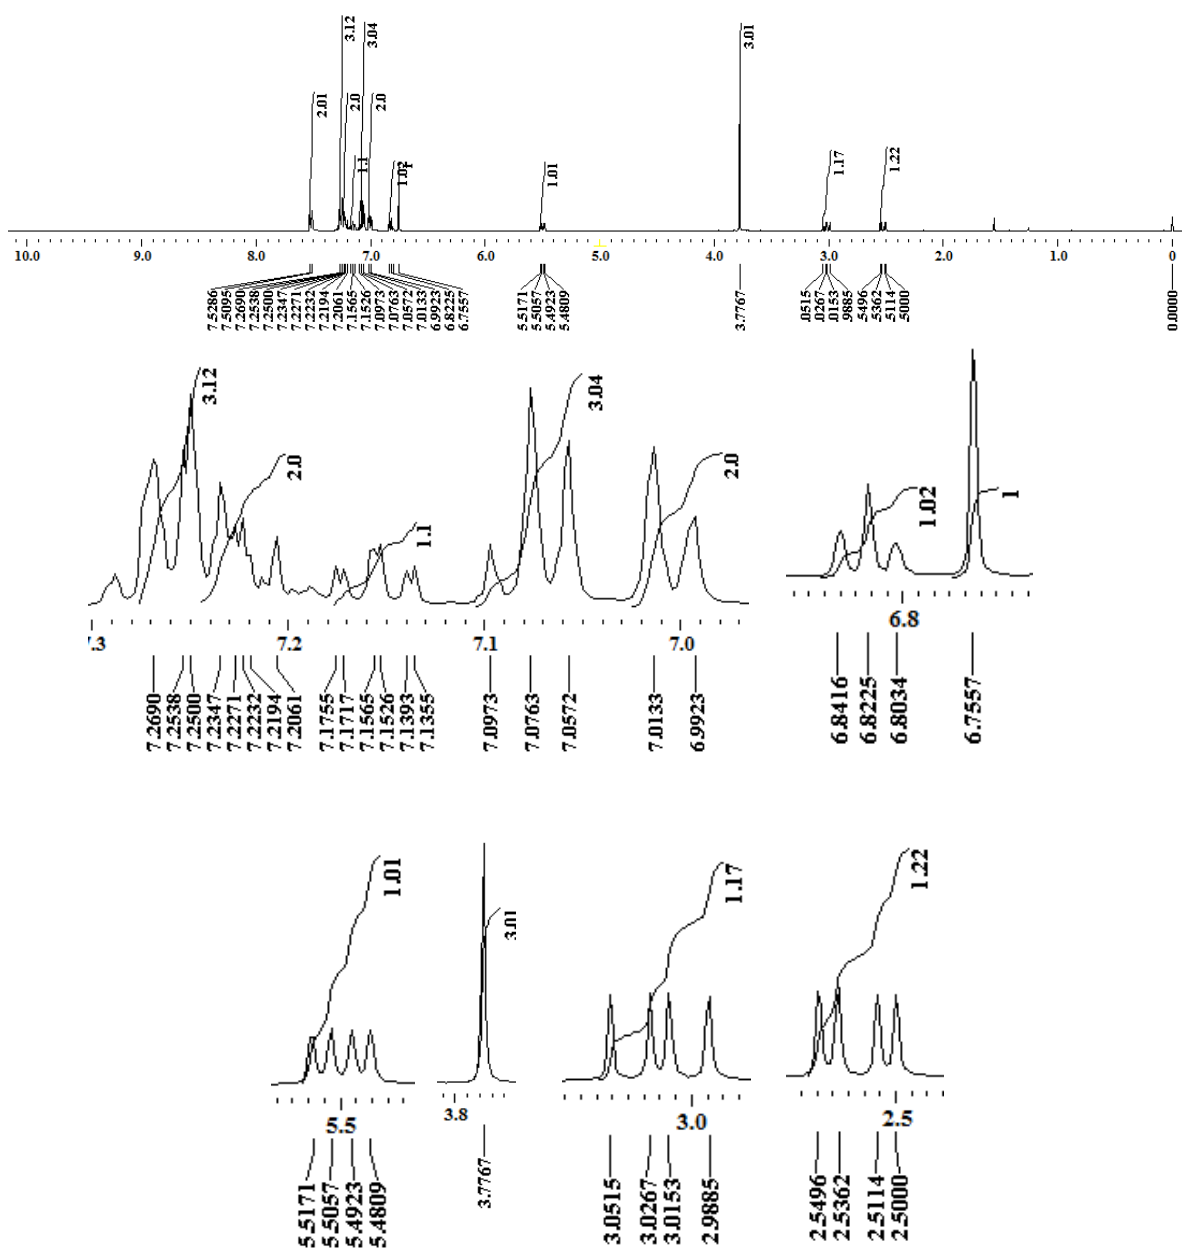

<sup>13</sup>C NMR in CDCl<sub>3</sub>

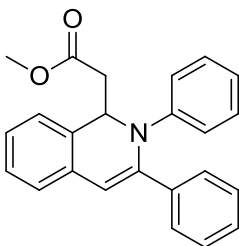

Methyl 2-(2,3-diphenyl-1,2-dihydroisoquinolin-1-yl)acetate (**3r**)

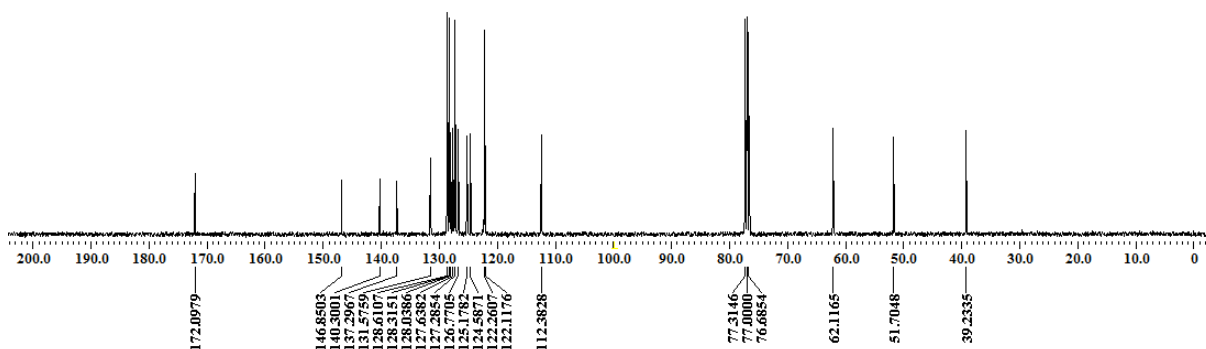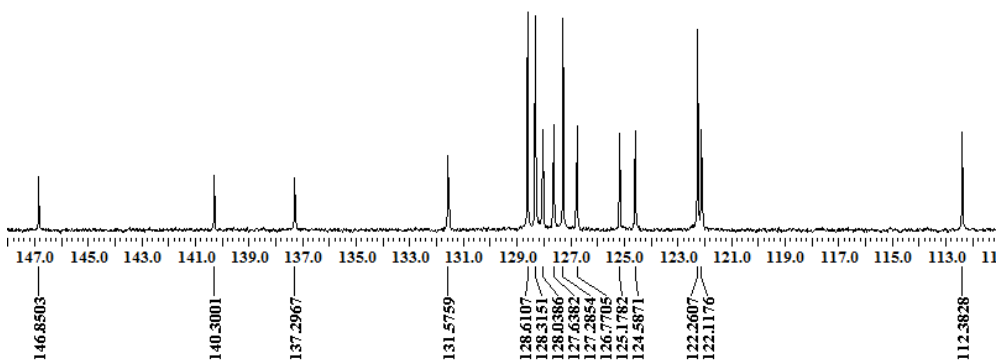

HRMS: Methyl 2-(2,3-diphenyl-1,2-dihydroisoquinolin-1-yl)acetate (**3r**)

Compound Table

| Compound Label                                          | RT | Mass     | Formula                                          | MFG Formula                                      | MFG Diff (ppm) | DB Formula                                       |
|---------------------------------------------------------|----|----------|--------------------------------------------------|--------------------------------------------------|----------------|--------------------------------------------------|
| Cpd 1: C <sub>24</sub> H <sub>21</sub> N O <sub>2</sub> | 11 | 355.1576 | C <sub>24</sub> H <sub>21</sub> N O <sub>2</sub> | C <sub>24</sub> H <sub>21</sub> N O <sub>2</sub> | -1.12          | C <sub>24</sub> H <sub>21</sub> N O <sub>2</sub> |

| Compound Label                                          | m/z      | RT | Algorithm                 | Mass     |
|---------------------------------------------------------|----------|----|---------------------------|----------|
| Cpd 1: C <sub>24</sub> H <sub>21</sub> N O <sub>2</sub> | 356.1649 | 11 | Find by Molecular Feature | 355.1576 |

MFE MS Spectrum

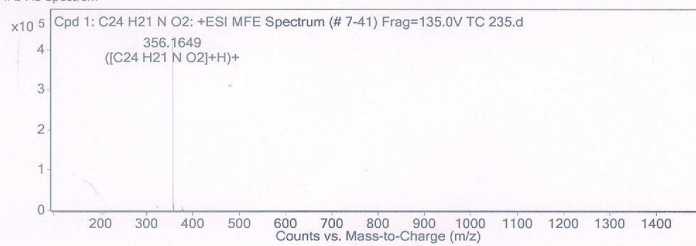

MFE MS Zoomed Spectrum

<sup>1</sup>H NMR in CDCl<sub>3</sub>

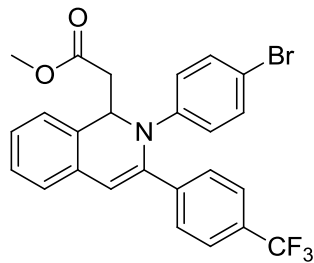

Methyl 2-(2-(4-bromophenyl)-3-(4-(trifluoromethyl)phenyl)-1,2-dihydroisoquinolin-1-yl)acetate (**3s**)

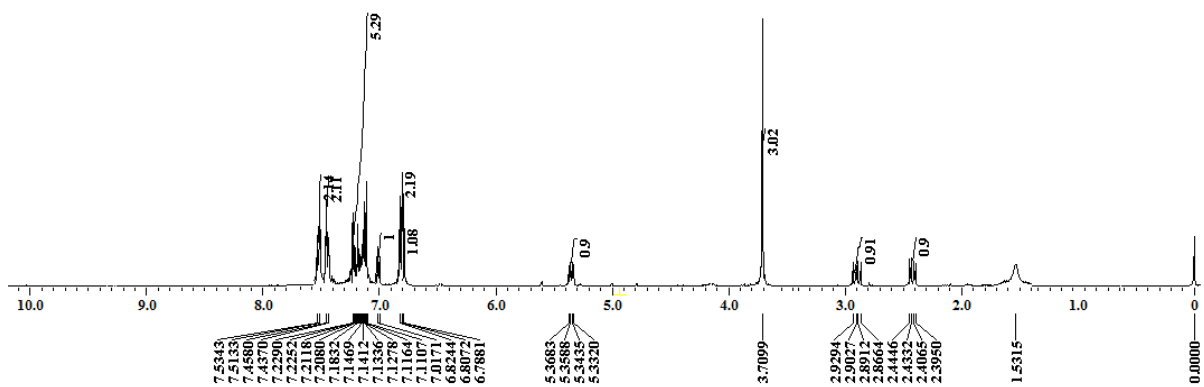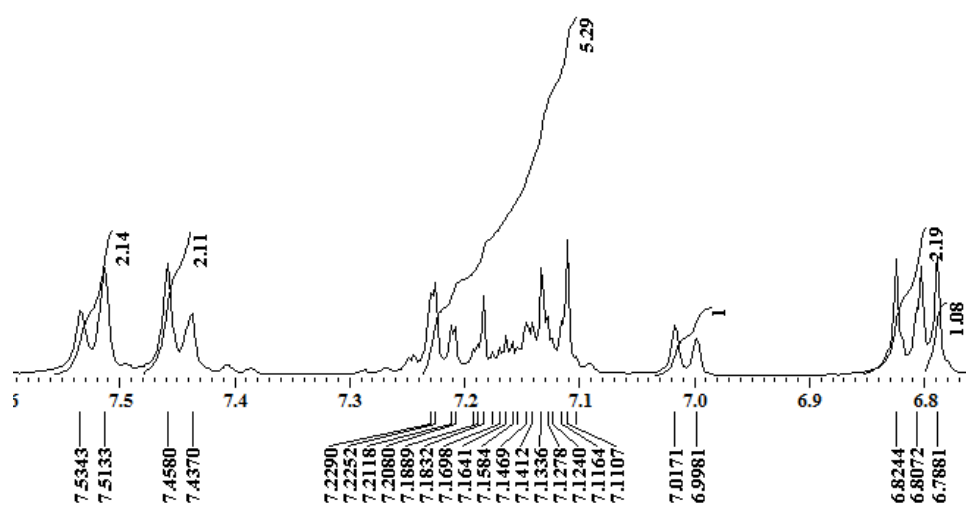

$^{13}\text{C}$  NMR in  $\text{CDCl}_3$

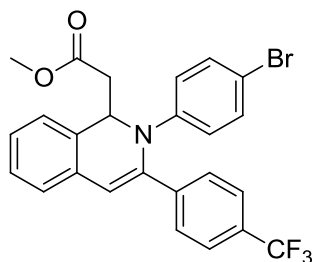

Methyl 2-(2-(4-bromophenyl)-3-(4-(trifluoromethyl)phenyl)-1,2-dihydroisoquinolin-1-yl)acetate (**3s**)

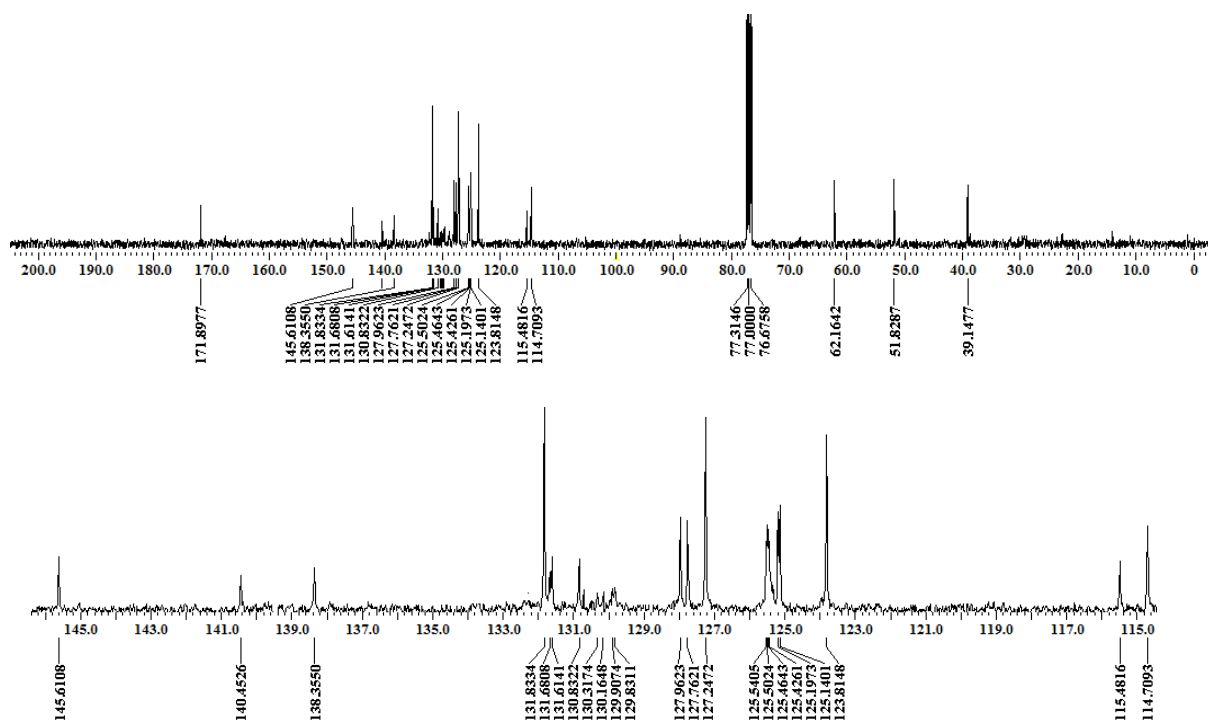

**HRMS:** Methyl 2-(2-(4-bromophenyl)-3-(4-(trifluoromethyl)phenyl)-1,2-dihydroisoquinolin-1-yl)acetate (**3s**)

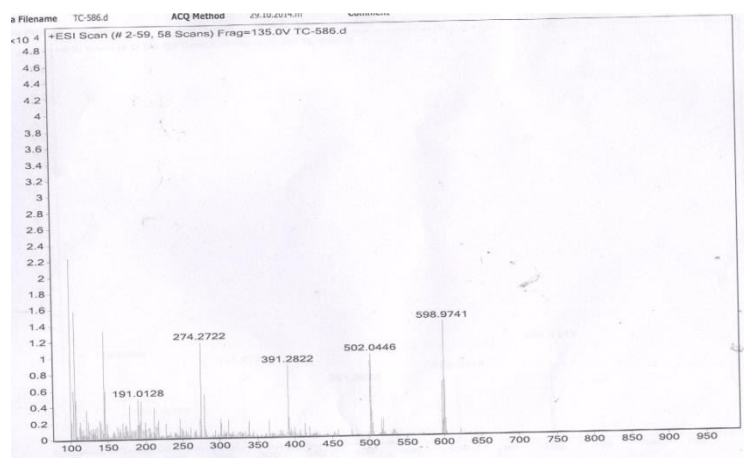



<sup>1</sup>H NMR in CDCl<sub>3</sub>

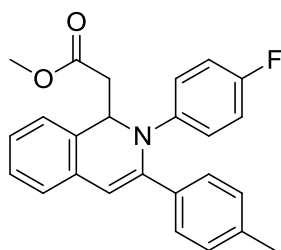

Methyl 2-(2-(4-fluorophenyl)-3-(*p*-tolyl)-1,2-dihydro-isoquinolin-1-yl)acetate (**3t**)

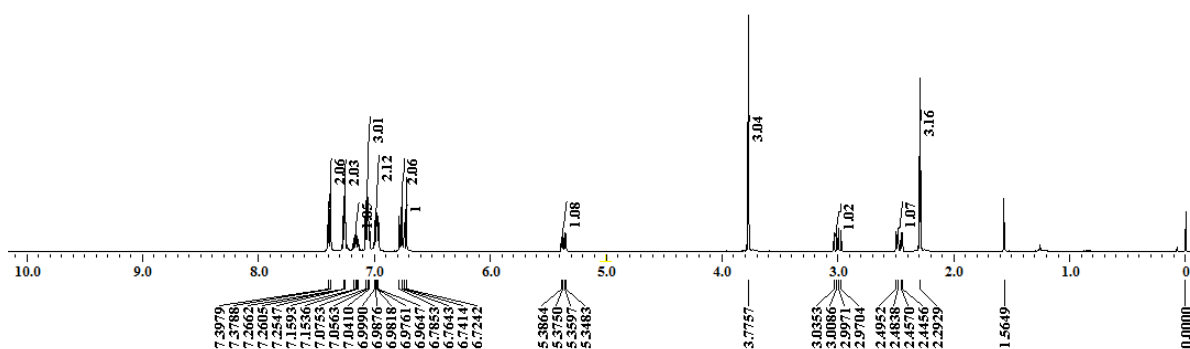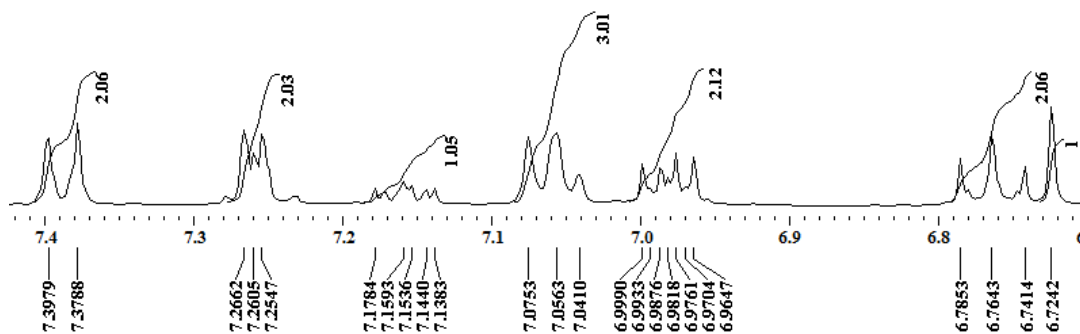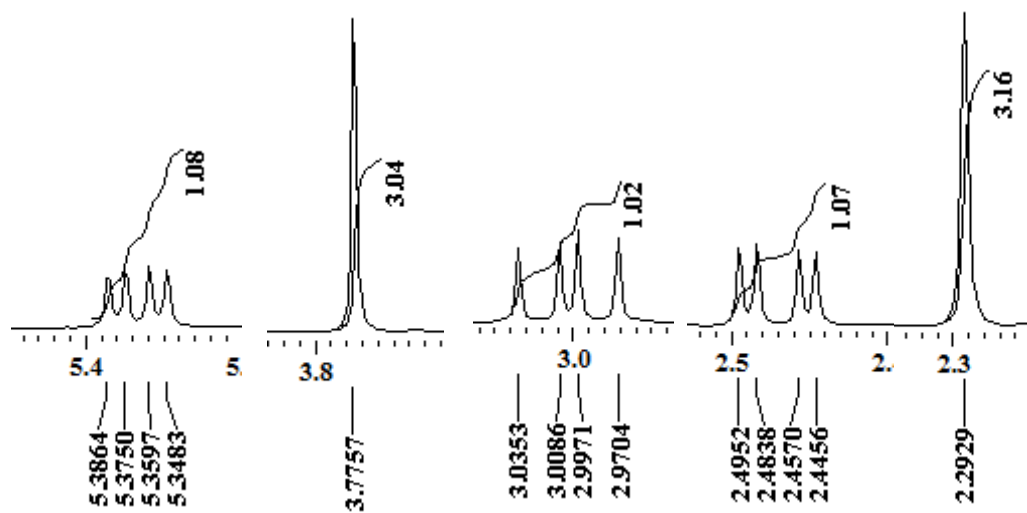

<sup>13</sup>C NMR in CDCl<sub>3</sub>

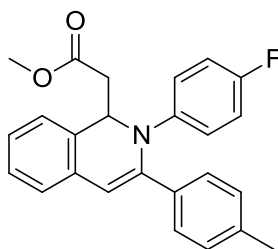

Methyl 2-(2-(4-fluorophenyl)-3-(*p*-tolyl)-1,2-dihydro-isoquinolin-1-yl)acetate (**3t**)

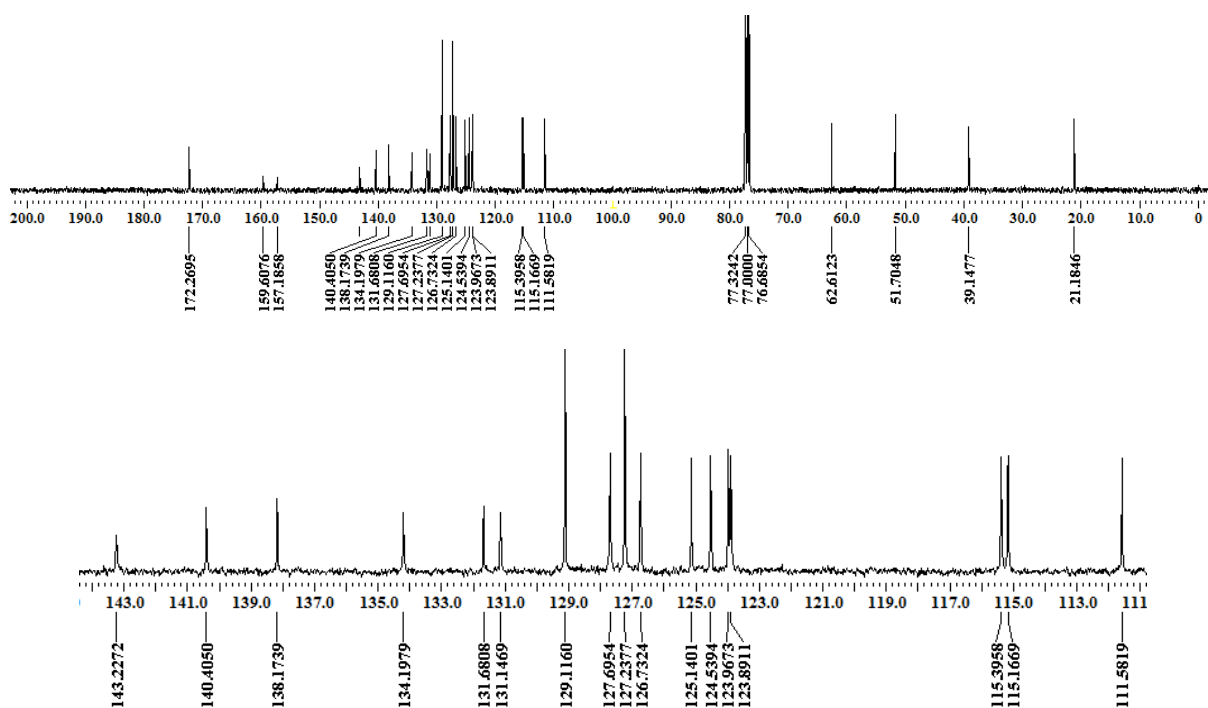

HRMS: Methyl 2-(2-(4-fluorophenyl)-3-(*p*-tolyl)-1,2-dihydro-isoquinolin-1-yl)acetate (**3t**)

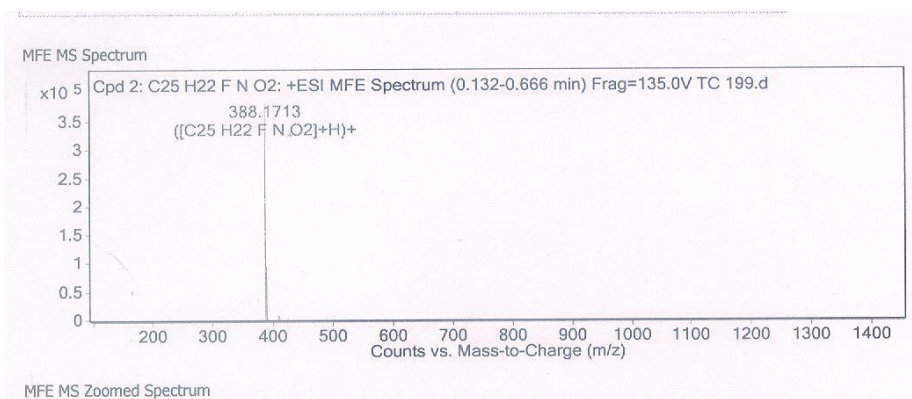

<sup>1</sup>H NMR in CDCl<sub>3</sub>

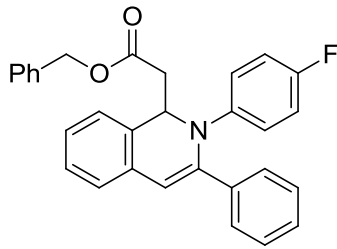

Benzyl 2-(2-(4-fluorophenyl)-3-phenyl-1,2-dihydroisoquinolin-1-yl)acetate (**3u**)

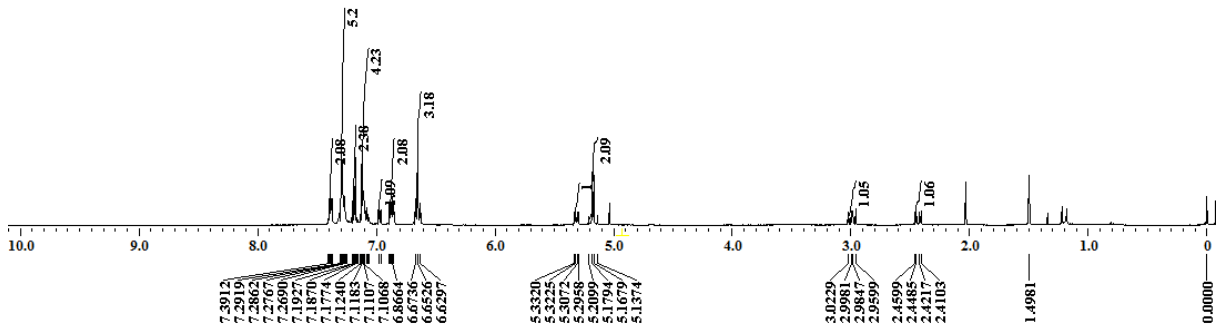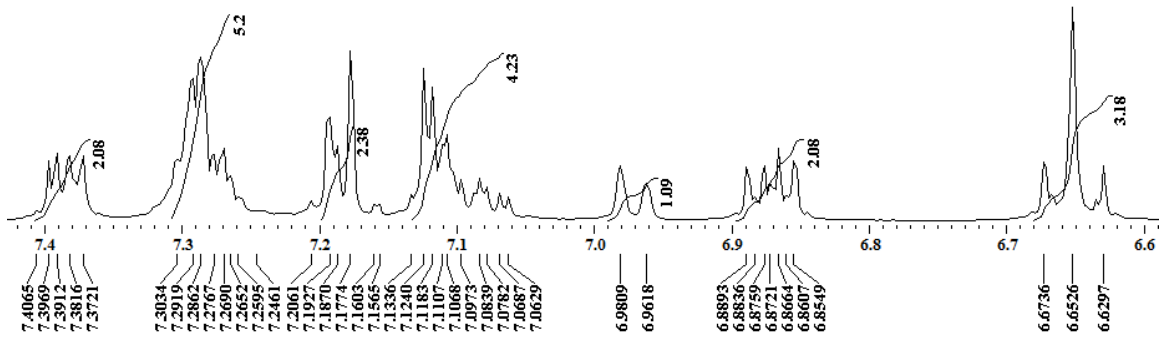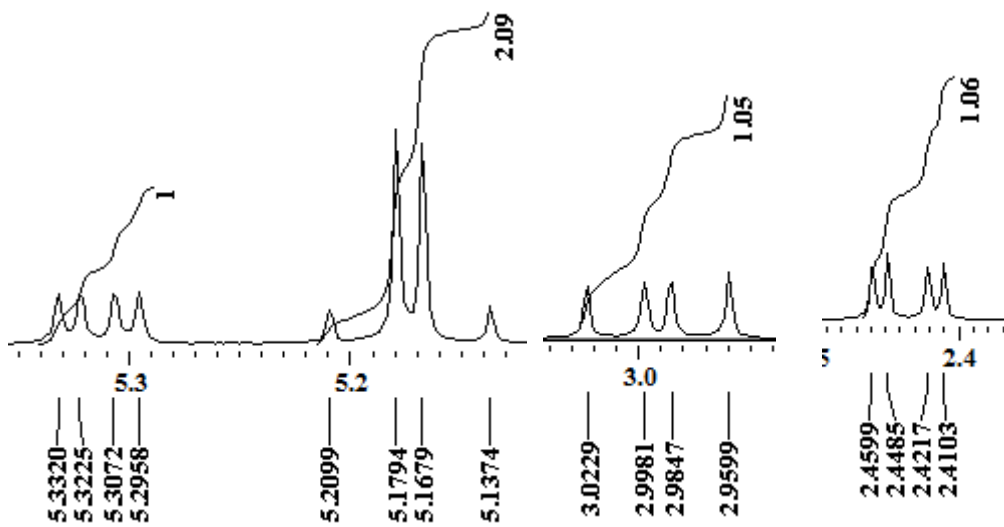

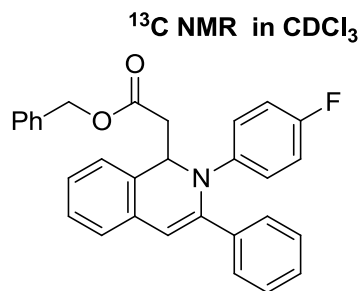

Benzyl 2-(2-(4-fluorophenyl)-3-phenyl-1,2-dihydroisoquinolin-1-yl)acetate (**3u**)

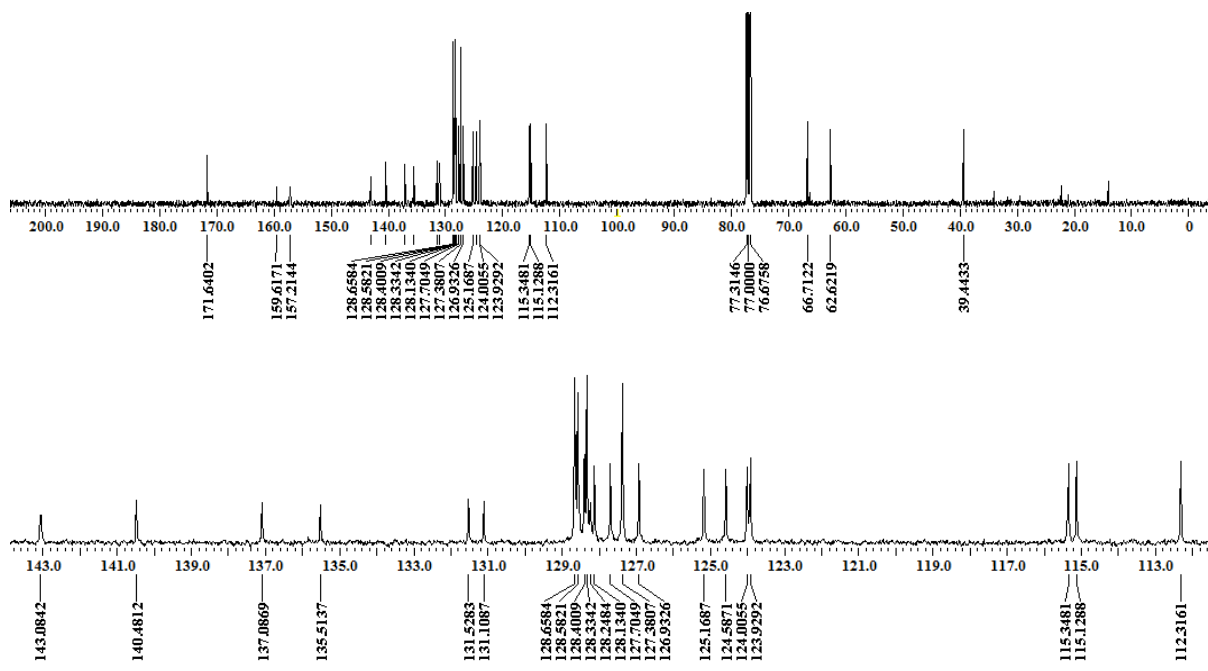

HRMS: Benzyl 2-(2-(4-fluorophenyl)-3-phenyl-1,2-dihydroisoquinolin-1-yl)acetate (**3u**)

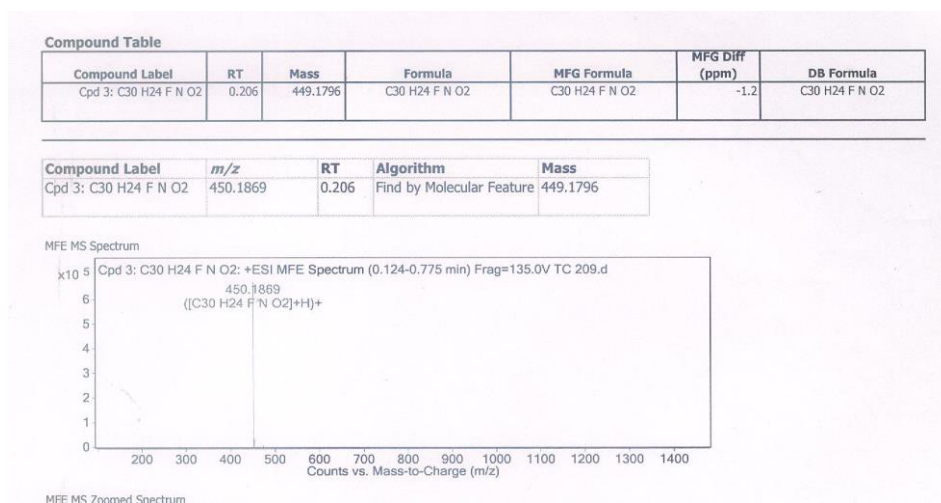

<sup>1</sup>H NMR in CDCl<sub>3</sub>

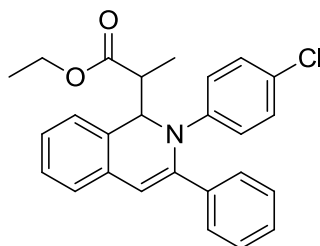

Ethyl 2-(2-(4-chlorophenyl)-3-phenyl-1,2-dihydroisoquinolin-1-yl)propanoate (**3v**)

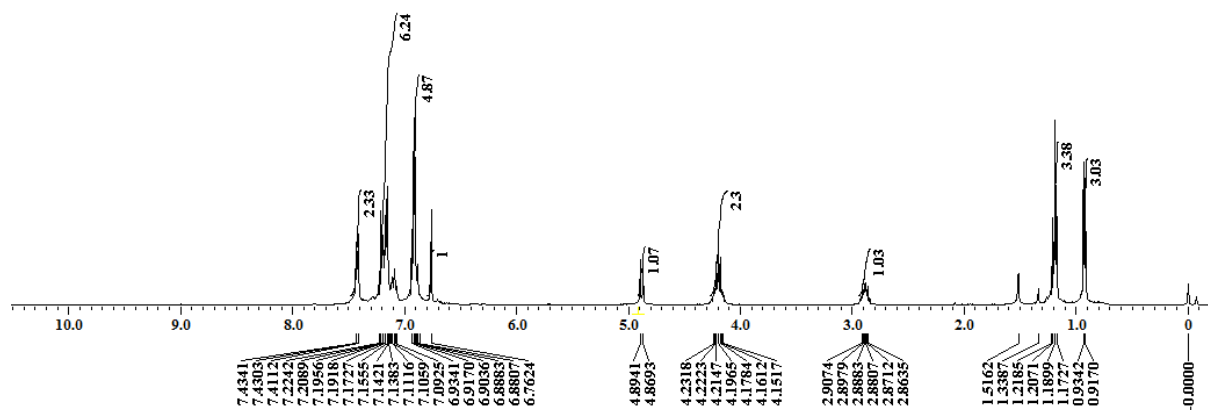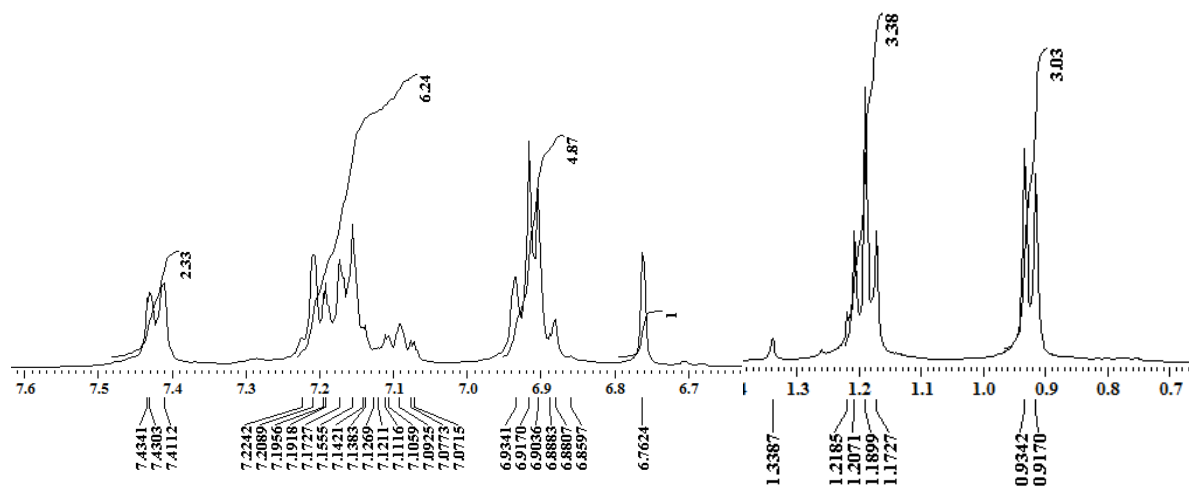

<sup>13</sup>C NMR in CDCl<sub>3</sub>

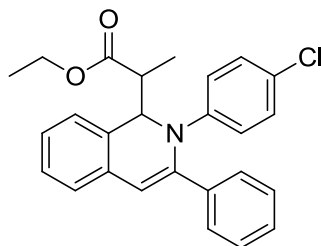

Ethyl 2-(2-(4-chlorophenyl)-3-phenyl-1,2-dihydroisoquinolin-1-yl)propanoate (**3v**)

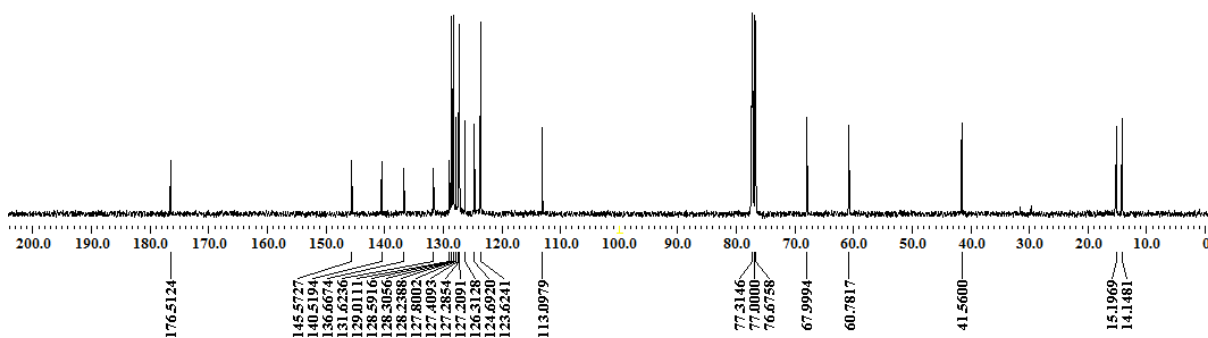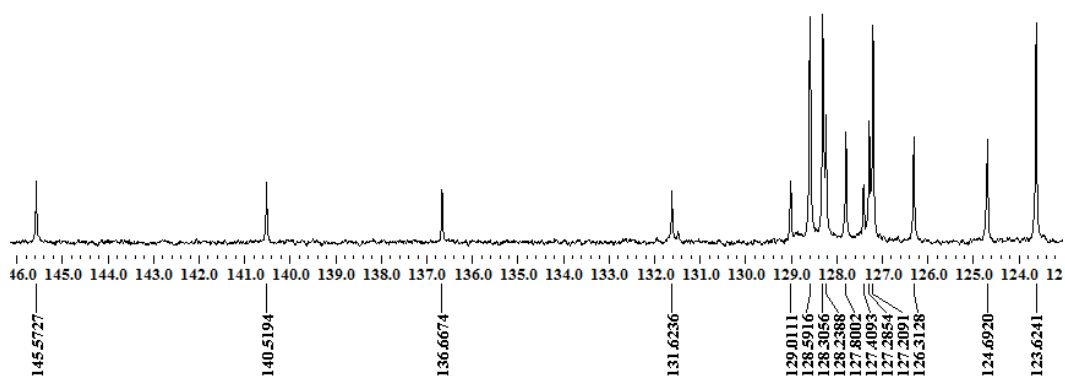

HRMS: Ethyl 2-(2-(4-chlorophenyl)-3-phenyl-1,2-dihydroisoquinolin-1-yl)propanoate (**3v**)

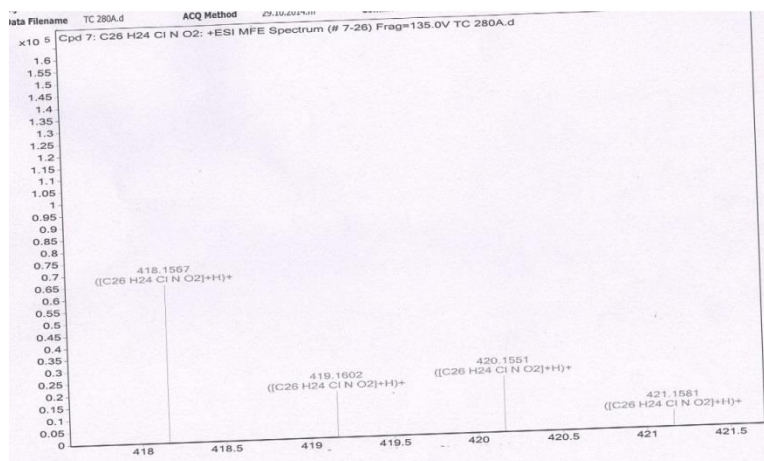

<sup>1</sup>H NMR in CDCl<sub>3</sub>

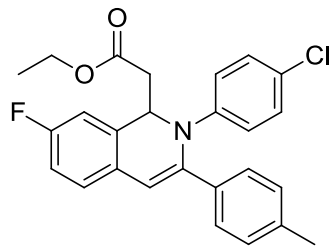

Ethyl 2-(2-(4-chlorophenyl)-7-fluoro-3-(p-tolyl)-1,2-dihydroisoquinolin-1-yl)acetate (**3w**)

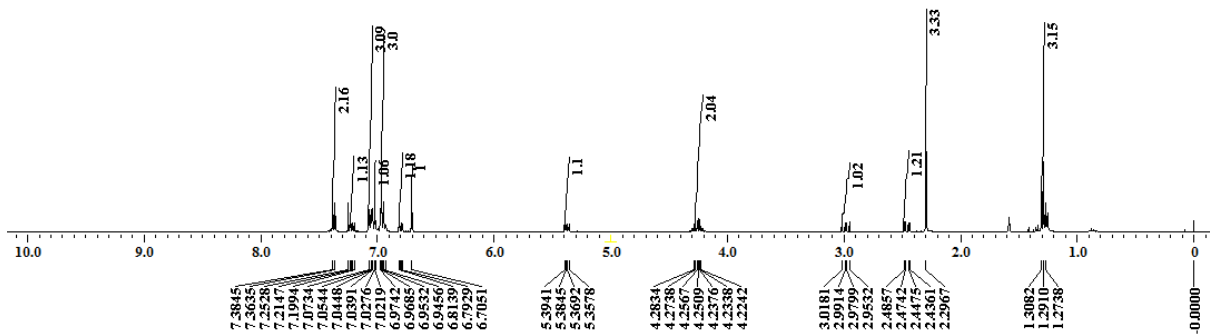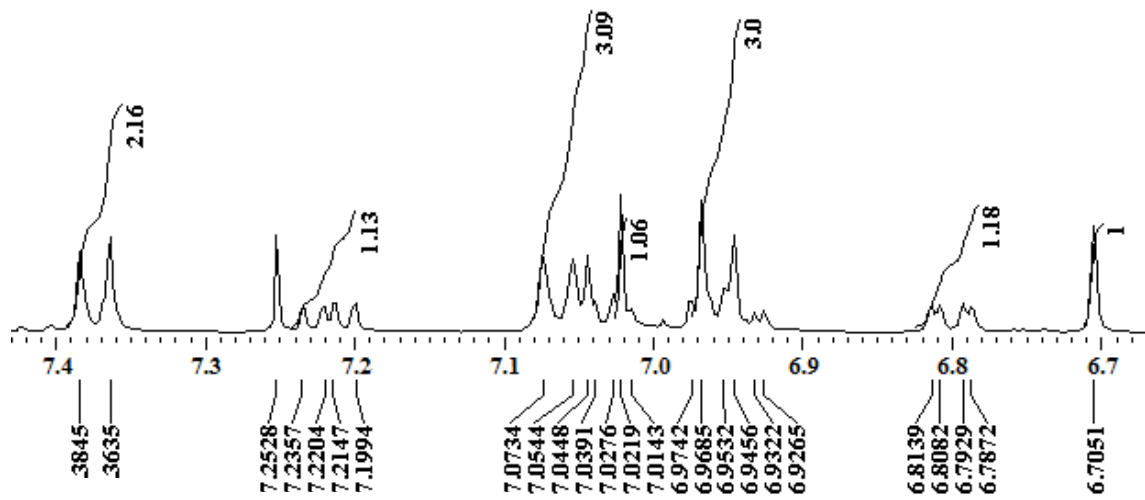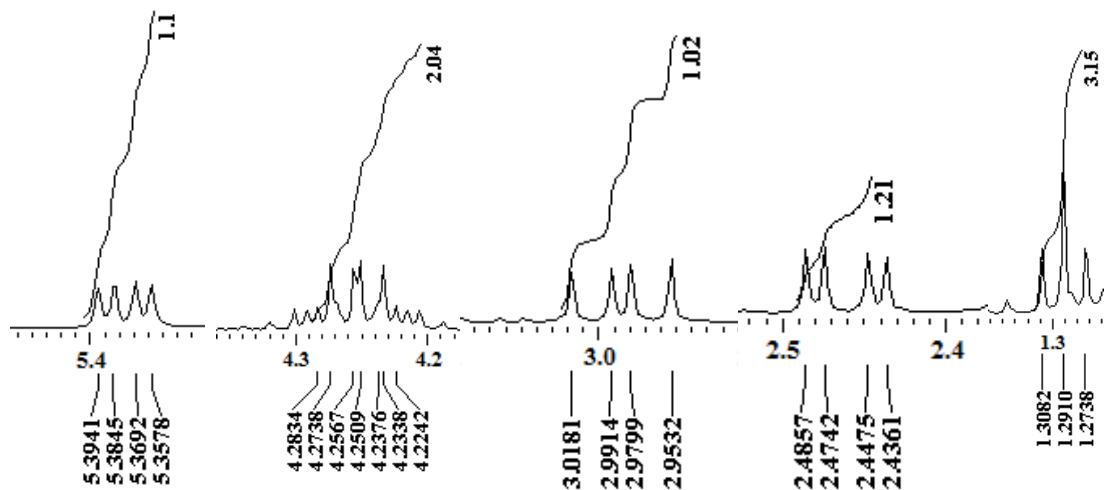

<sup>13</sup>C NMR in CDCl<sub>3</sub>

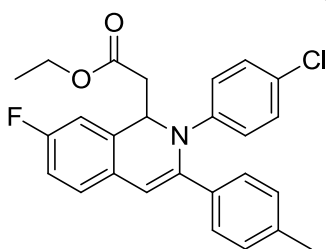

Ethyl 2-(2-(4-chlorophenyl)-7-fluoro-3-(*p*-tolyl)-1,2-dihydroisoquinolin-1-yl)acetate (**3w**)

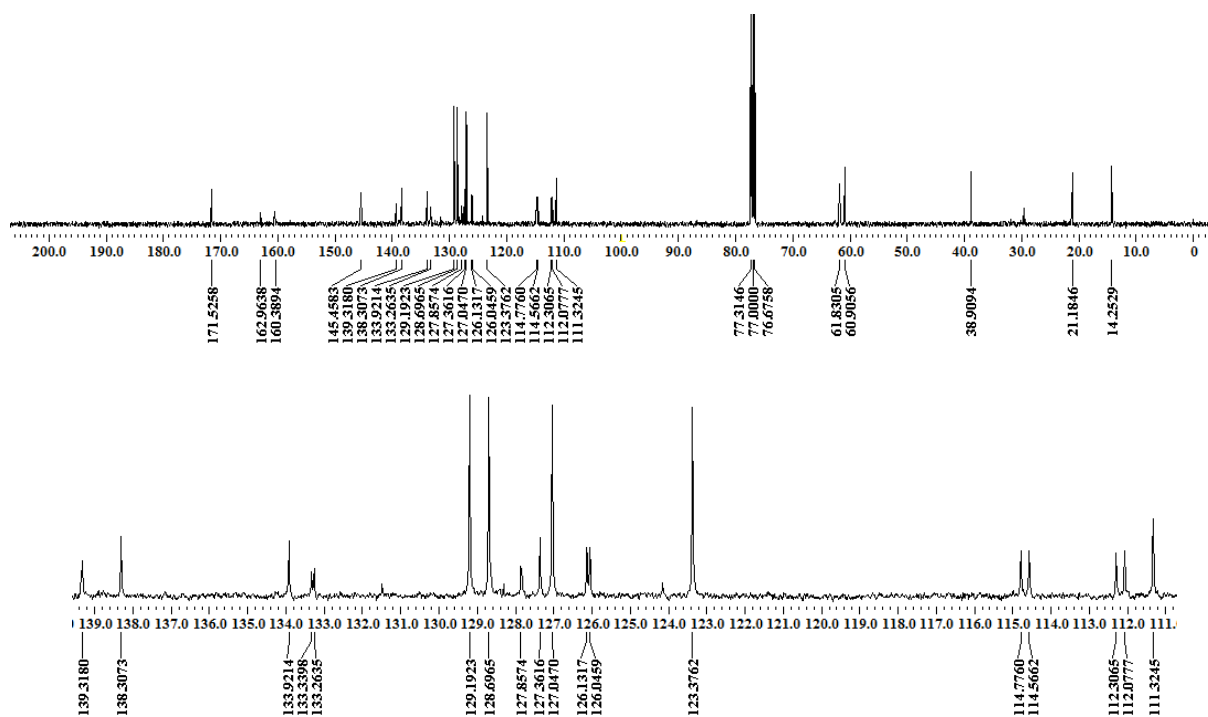

HRMS: Ethyl 2-(2-(4-chlorophenyl)-7-fluoro-3-(*p*-tolyl)-1,2-dihydroisoquinolin-1-yl)acetate (**3w**)

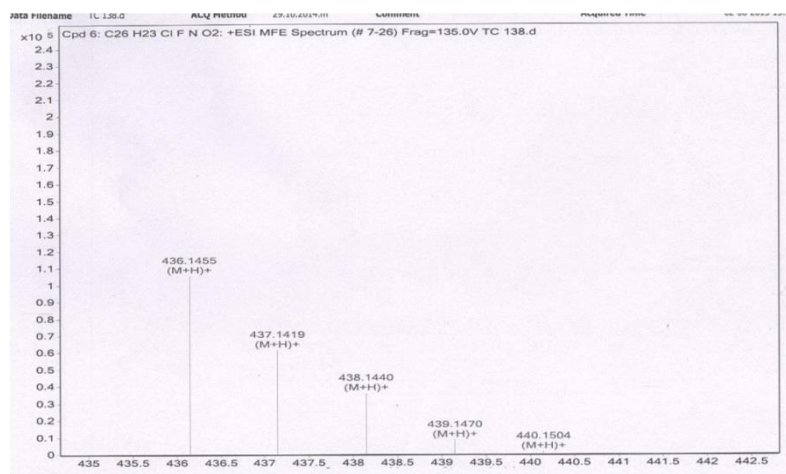



<sup>1</sup>H NMR in CDCl<sub>3</sub>

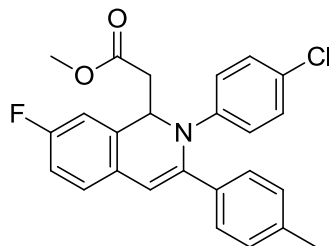

Methyl 2-(2-(4-chlorophenyl)-7-fluoro-3-(*p*-tolyl)-1,2-dihydroisoquinolin-1-yl)acetate (**3x**)

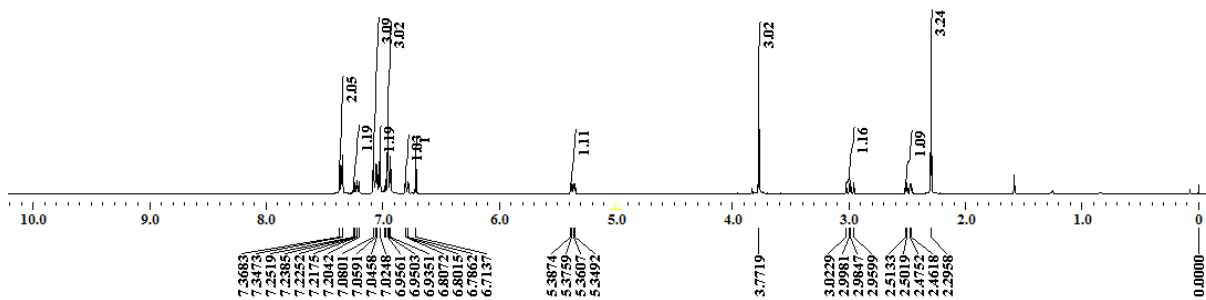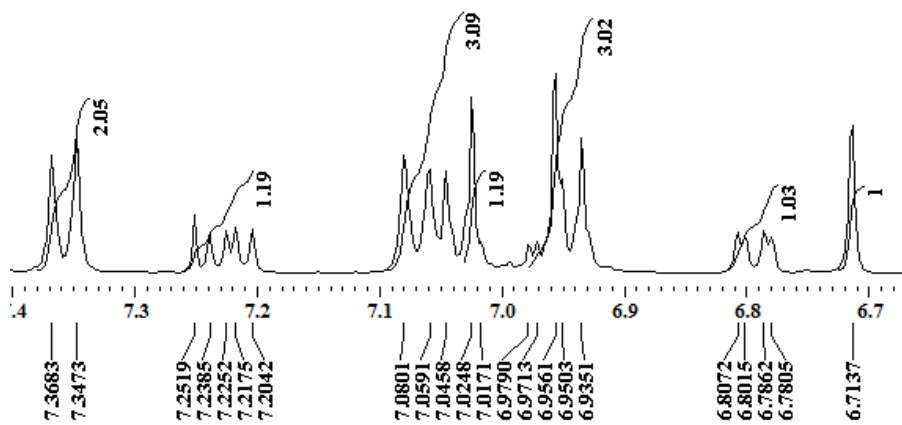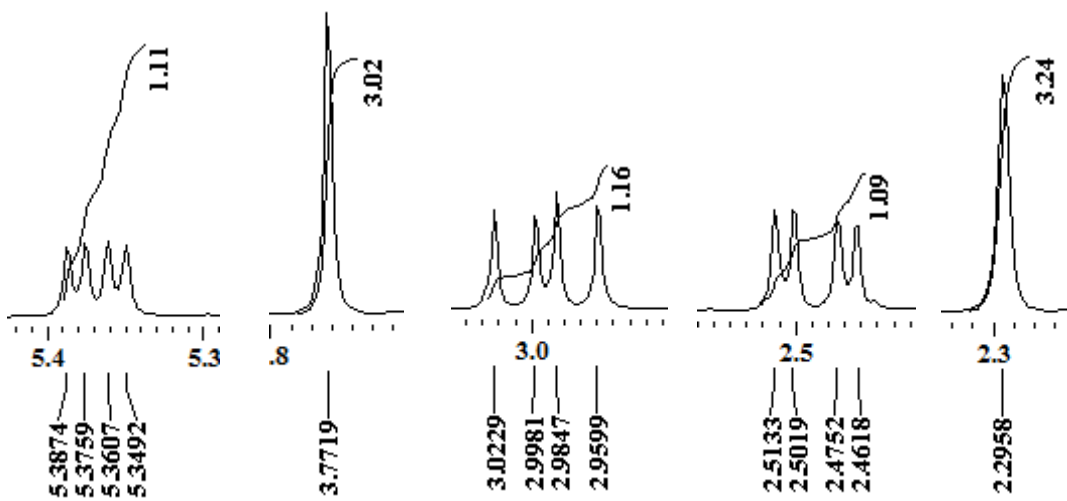

<sup>13</sup>C NMR in CDCl<sub>3</sub>

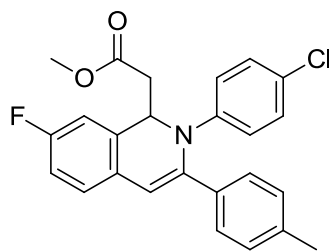

Methyl 2-(2-(4-chlorophenyl)-7-fluoro-3-(p-tolyl)-1,2-dihydroisoquinolin-1-yl)acetate (**3x**)

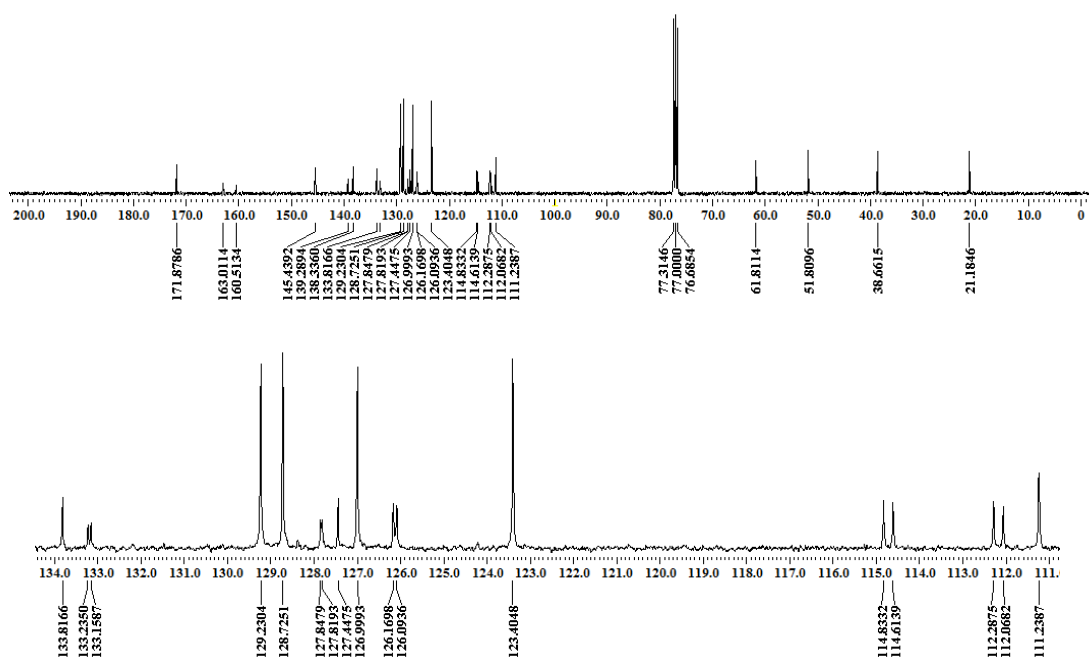

HRMS: Methyl 2-(2-(4-chlorophenyl)-7-fluoro-3-(p-tolyl)-1,2-dihydroisoquinolin-1-yl)acetate (**3x**)

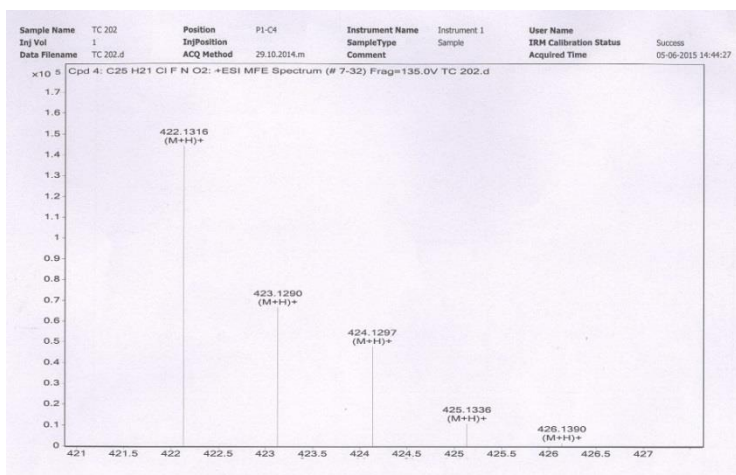

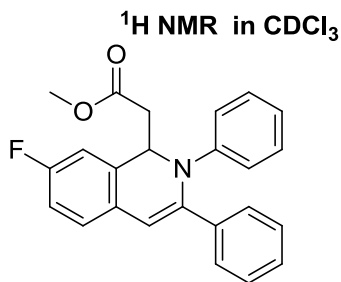

Methyl 2-(7-fluoro-2,3-diphenyl-1,2-dihydroisoquinolin-1-yl)acetate (**3y**)

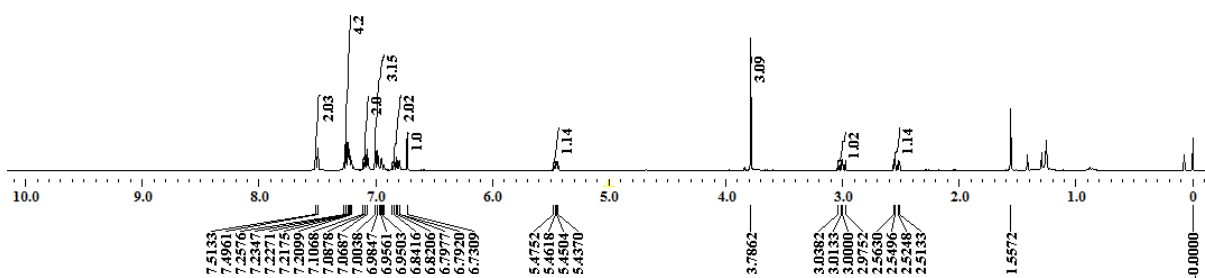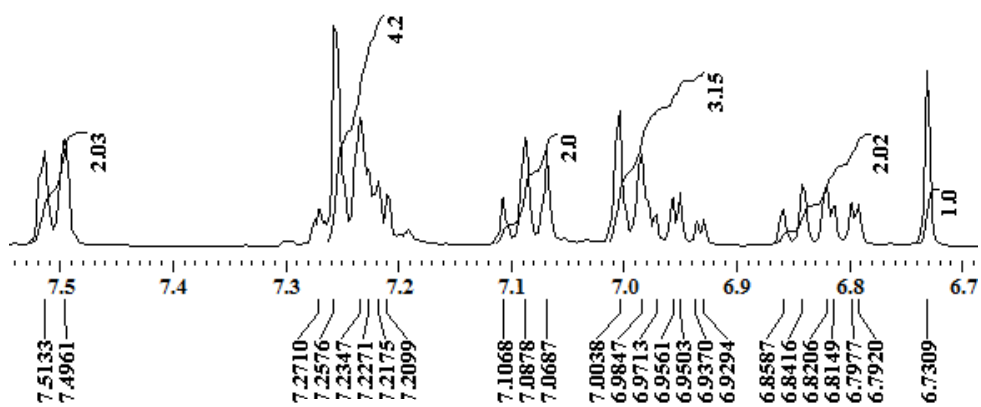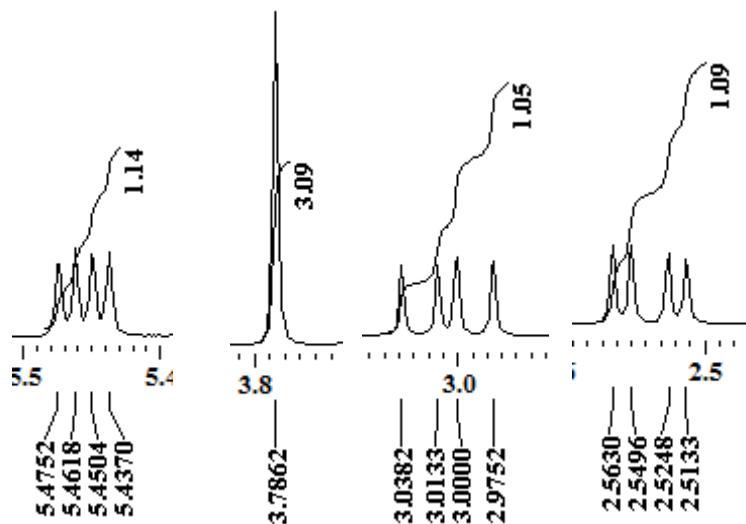

<sup>13</sup>C NMR in CDCl<sub>3</sub>

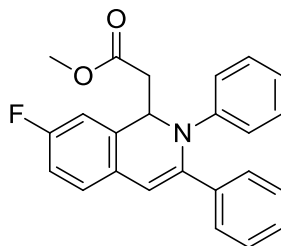

Methyl 2-(7-fluoro-2,3-diphenyl-1,2-dihydroisoquinolin-1-yl)acetate (**3y**)

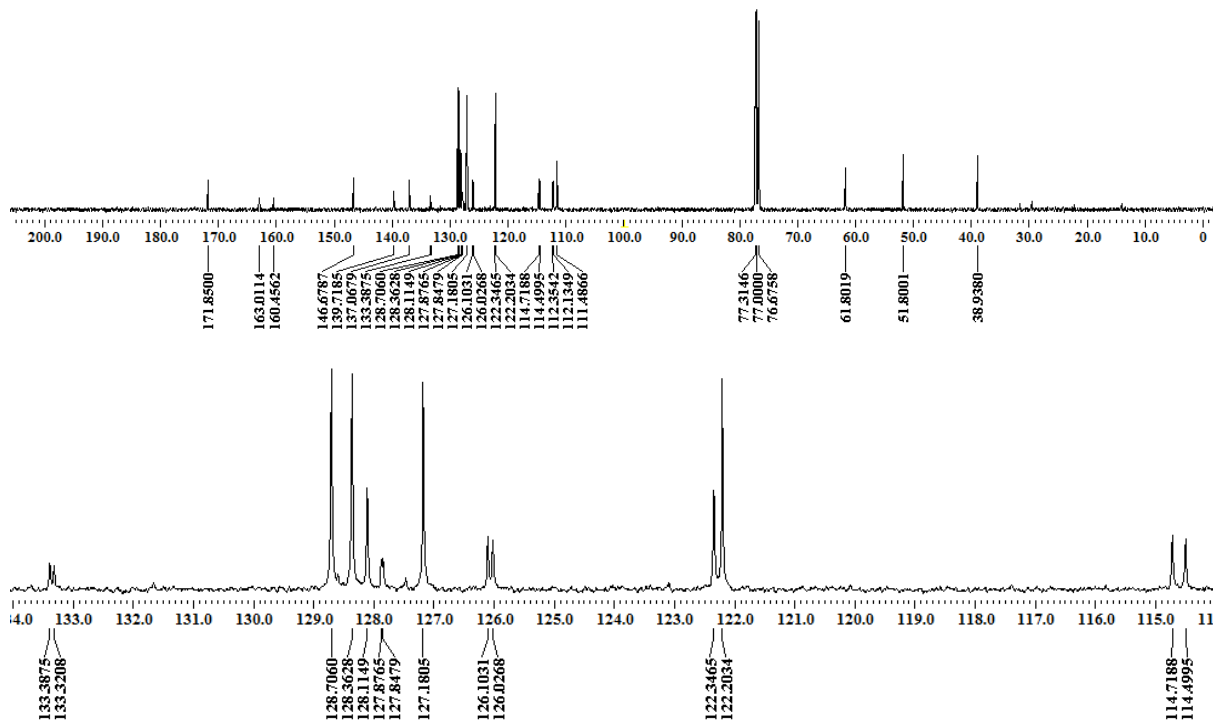

HRMS: Methyl 2-(7-fluoro-2,3-diphenyl-1,2-dihydroisoquinolin-1-yl)acetate (**3y**)

Compound Table

| Compound Label                                            | RT | Mass     | Formula                                            | MFG Formula                                        | MFG Diff (ppm) | DB Formula                                         |
|-----------------------------------------------------------|----|----------|----------------------------------------------------|----------------------------------------------------|----------------|----------------------------------------------------|
| Cpd 9: C <sub>24</sub> H <sub>20</sub> F N O <sub>2</sub> | 13 | 373.1482 | C <sub>24</sub> H <sub>20</sub> F N O <sub>2</sub> | C <sub>24</sub> H <sub>20</sub> F N O <sub>2</sub> | -0.94          | C <sub>24</sub> H <sub>20</sub> F N O <sub>2</sub> |

| Compound Label                                            | m/z      | RT | Algorithm                 | Mass     |
|-----------------------------------------------------------|----------|----|---------------------------|----------|
| Cpd 9: C <sub>24</sub> H <sub>20</sub> F N O <sub>2</sub> | 374.1554 | 13 | Find by Molecular Feature | 373.1482 |

MFE MS Spectrum

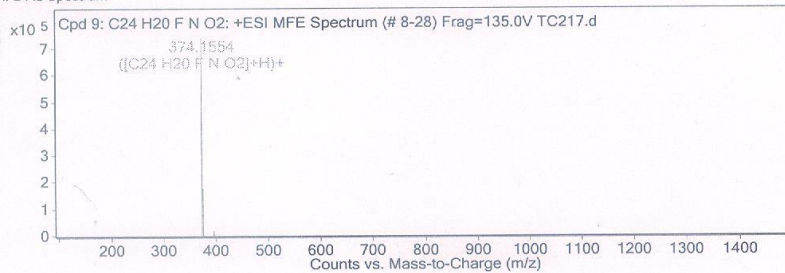

<sup>1</sup>H NMR in CDCl<sub>3</sub>

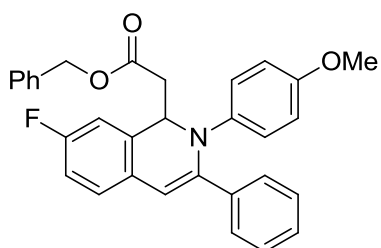

Benzyl 2-(7-fluoro-2-(4-methoxyphenyl)-3-phenyl-1,2-dihydroisoquinolin-1-yl)acetate (**3z**)

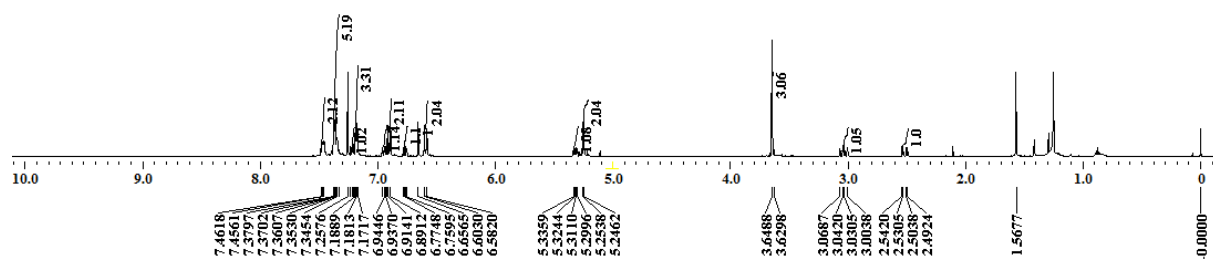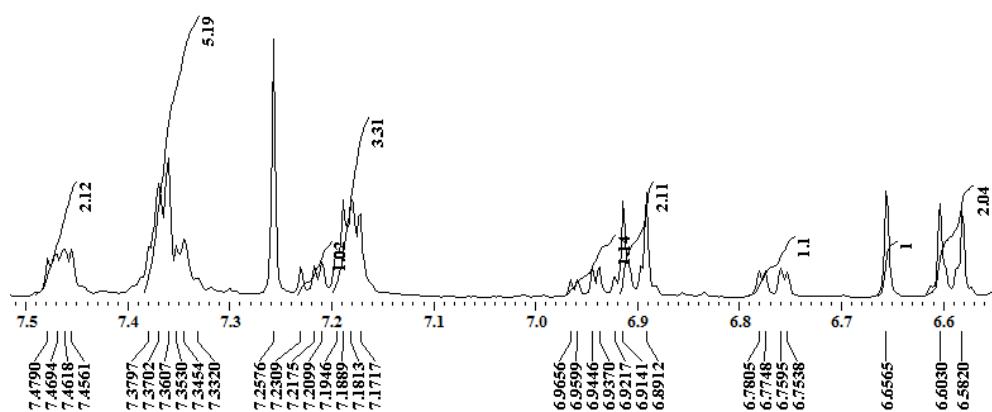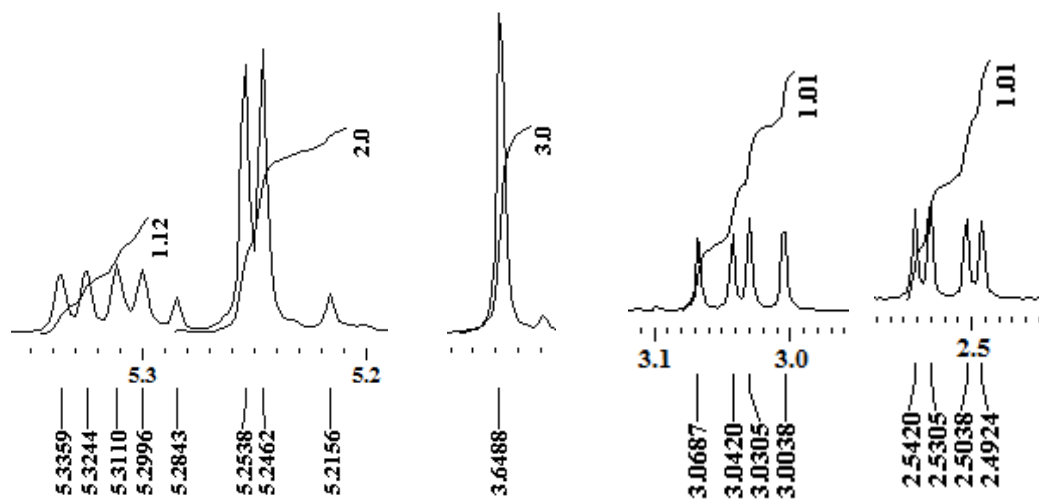

<sup>13</sup>C NMR in CDCl<sub>3</sub>

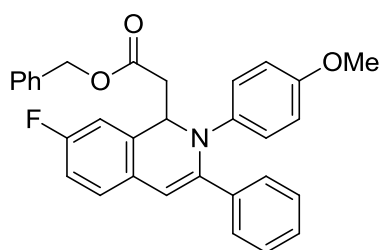

Benzyl 2-(7-fluoro-2-(4-methoxyphenyl)-3-phenyl-1,2-dihydroisoquinolin-1-yl)acetate (**3z**)

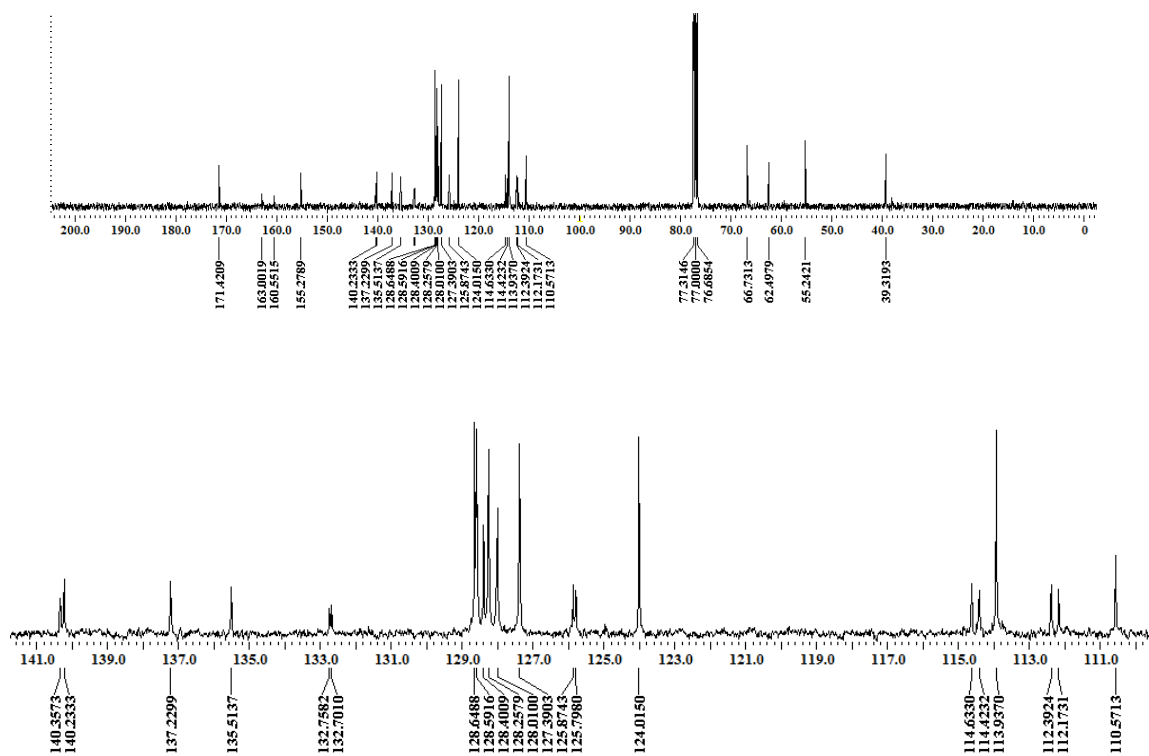

HRMS: Benzyl 2-(7-fluoro-2-(4-methoxyphenyl)-3-phenyl-1,2-dihydroisoquinolin-1-yl)acetate (**3z**)

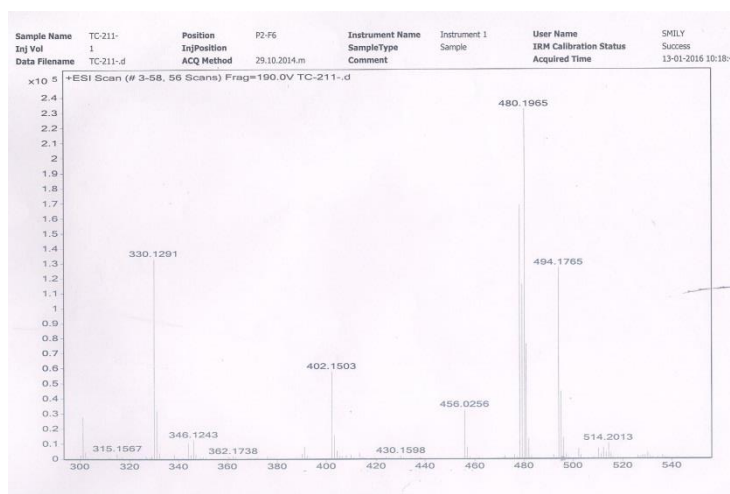

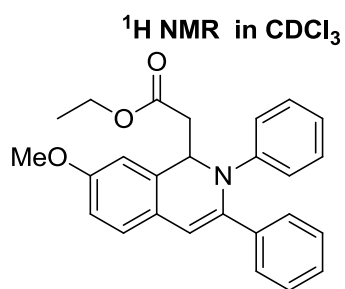

Ethyl 2-(7-methoxy-2,3-diphenyl-1,2-dihydroisoquinolin-1-yl)acetate (**3za**)

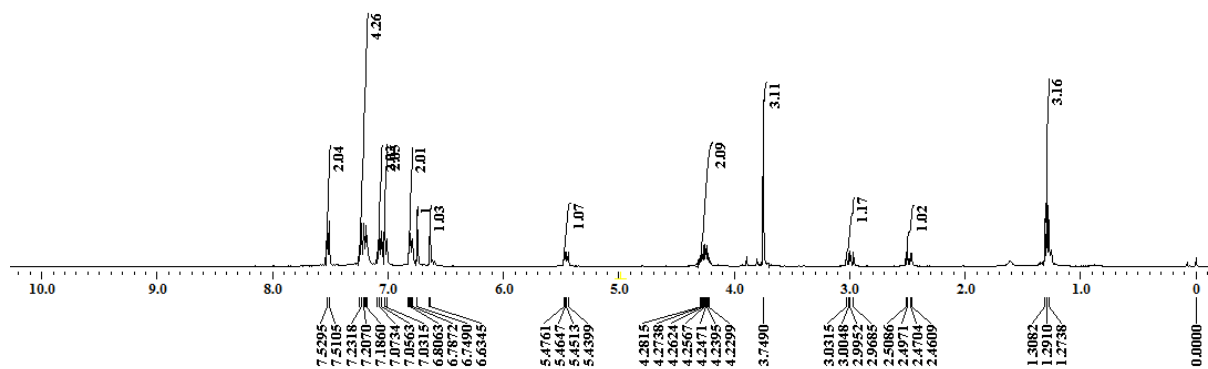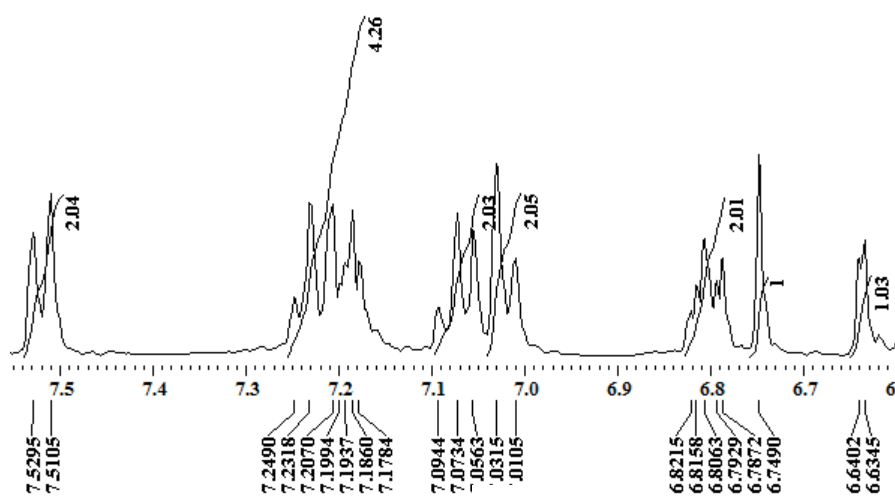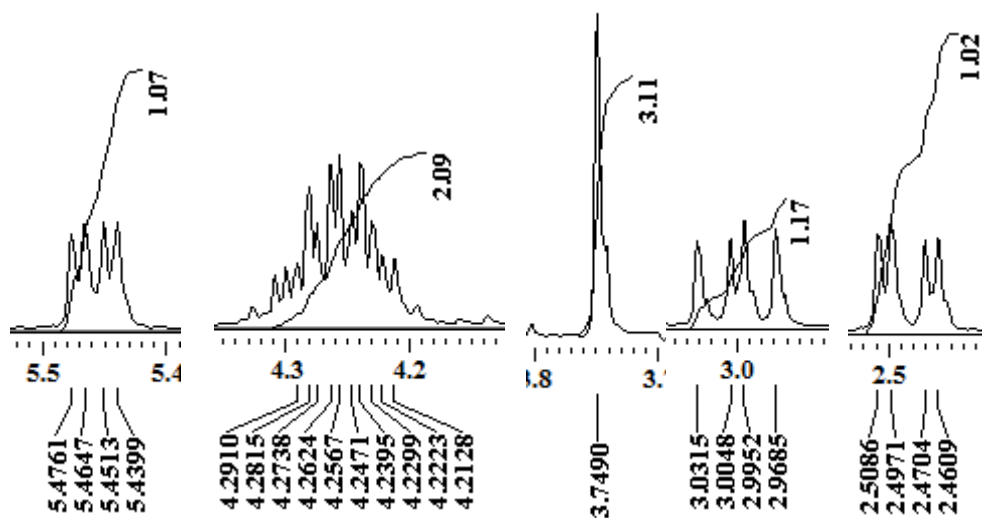

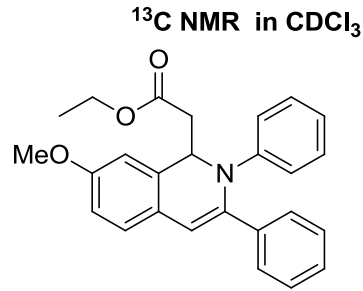

Ethyl 2-(7-methoxy-2,3-diphenyl-1,2-dihydroisoquinolin-1-yl)acetate (**3za**)

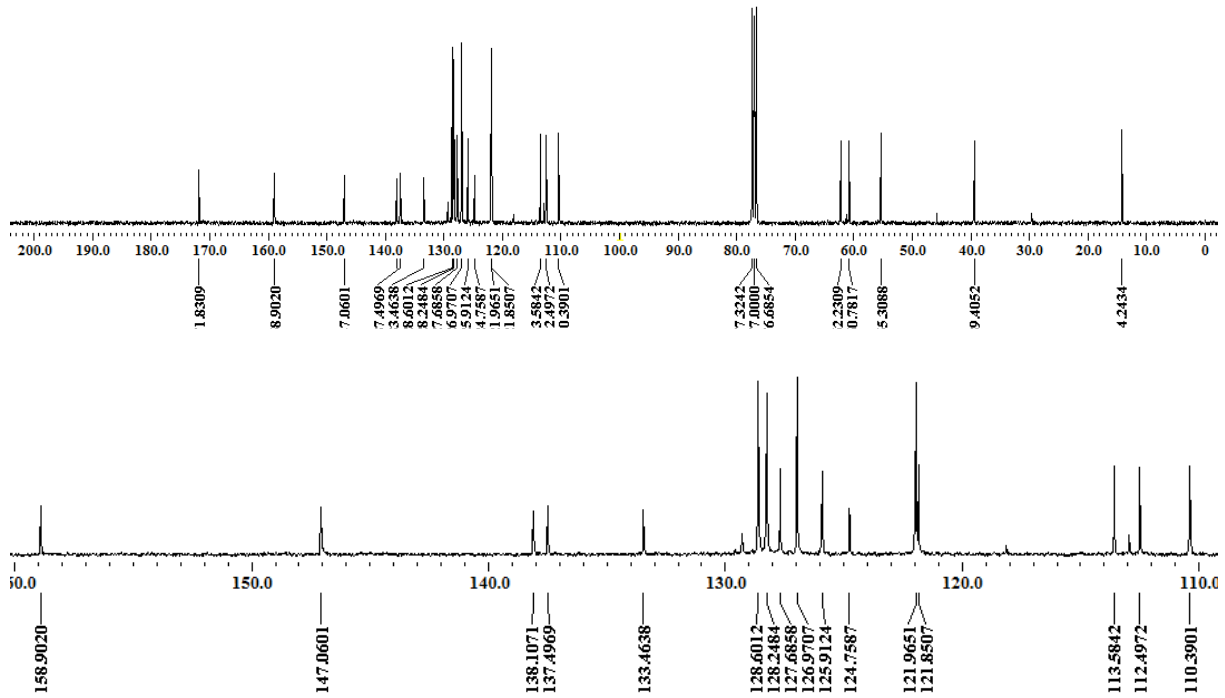

HRMS: Ethyl 2-(7-methoxy-2,3-diphenyl-1,2-dihydroisoquinolin-1-yl)acetate (**3za**)

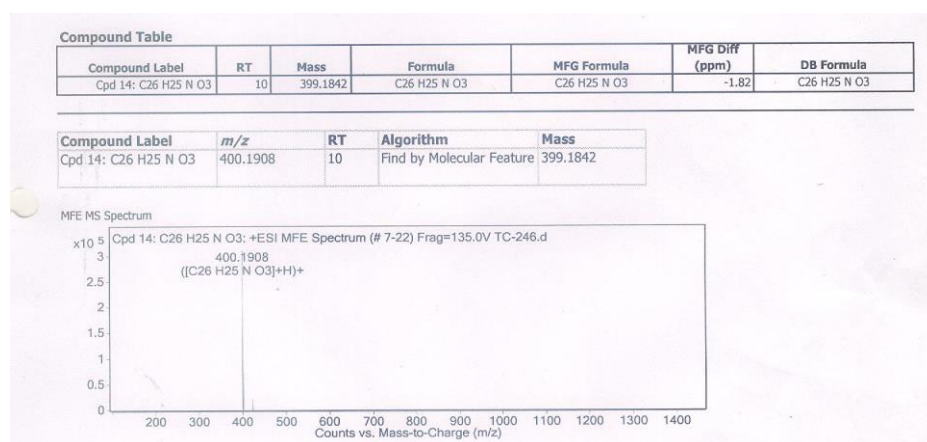



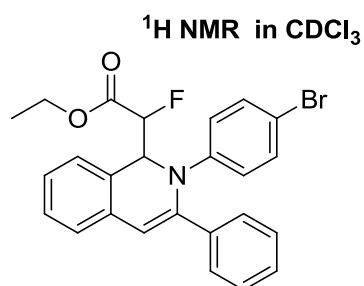

Ethyl 2-(2-(4-bromophenyl)-3-phenyl-1,2-dihydroisoquinolin-1-yl)-2-fluoroacetate (**3zb**)

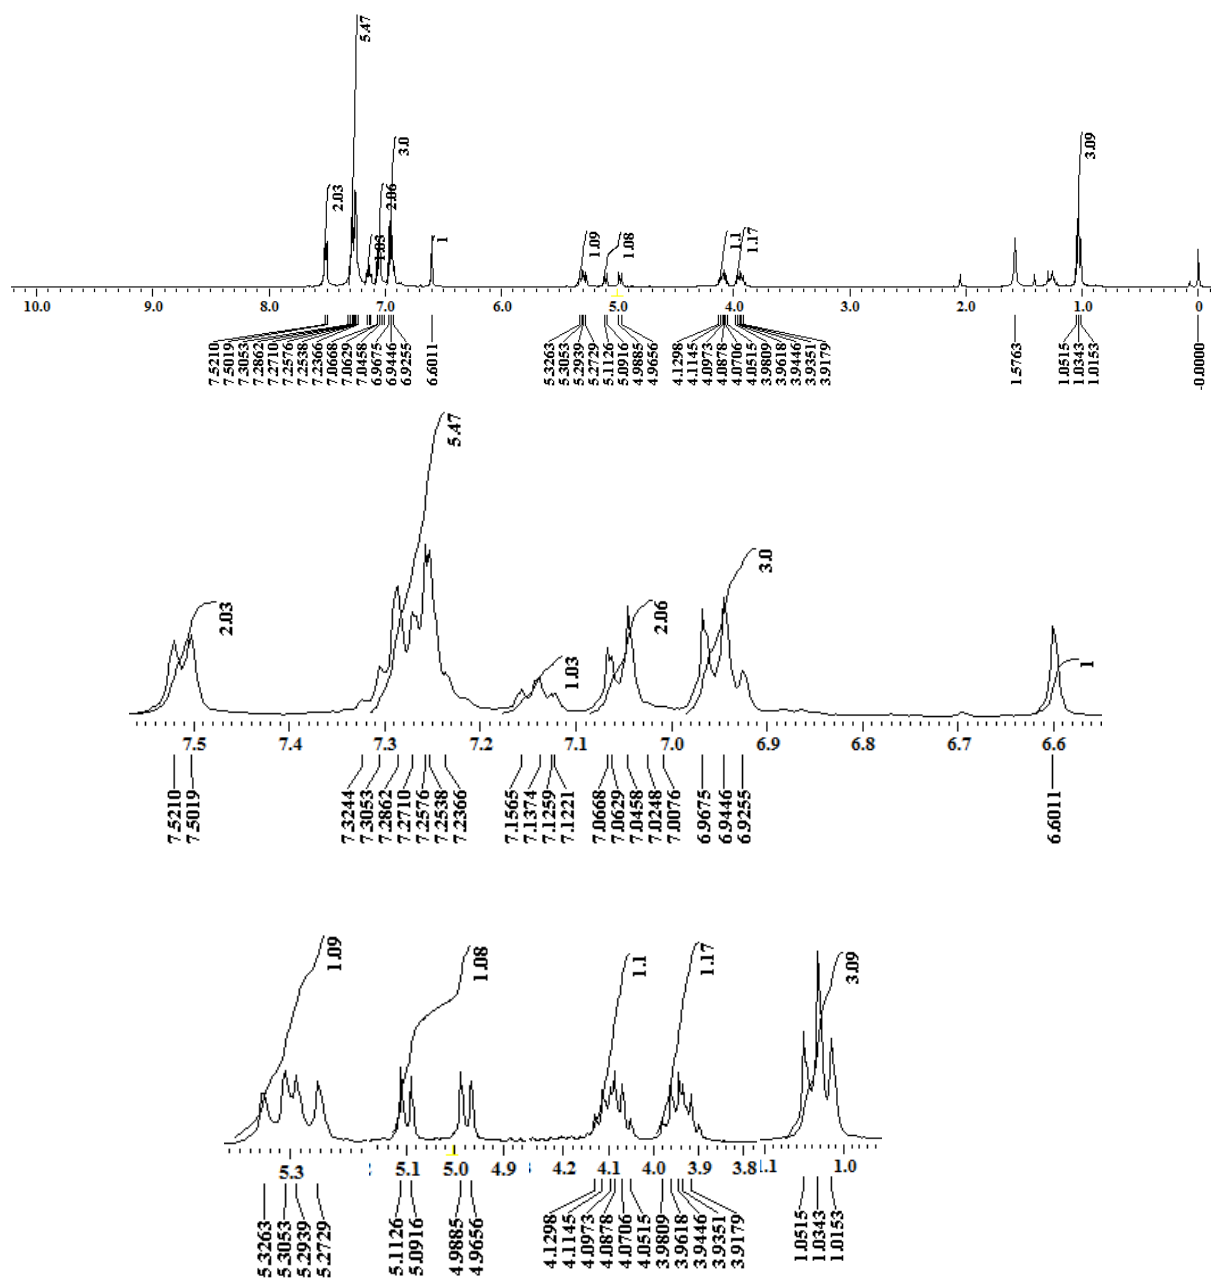

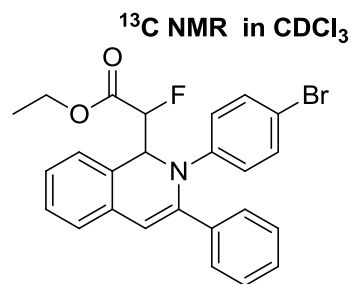

Ethyl 2-(2-(4-bromophenyl)-3-phenyl-1,2-dihydroisoquinolin-1-yl)-2-fluoroacetate (**3zb**)

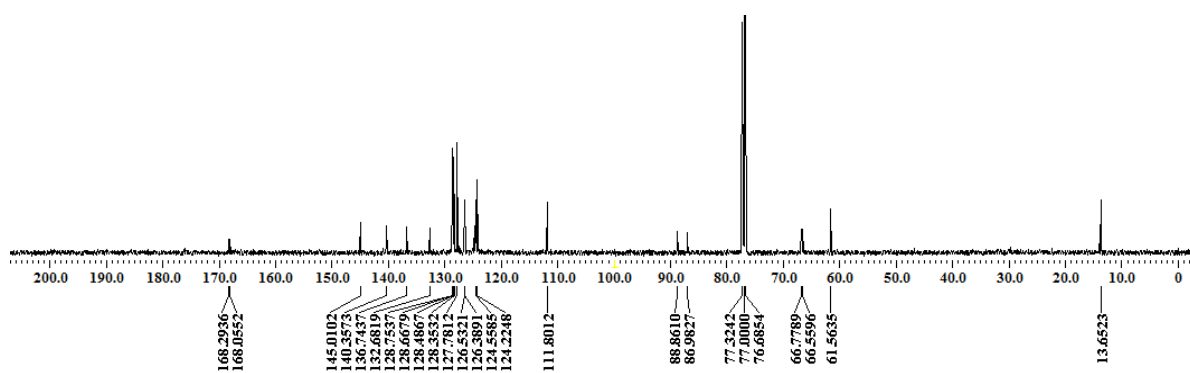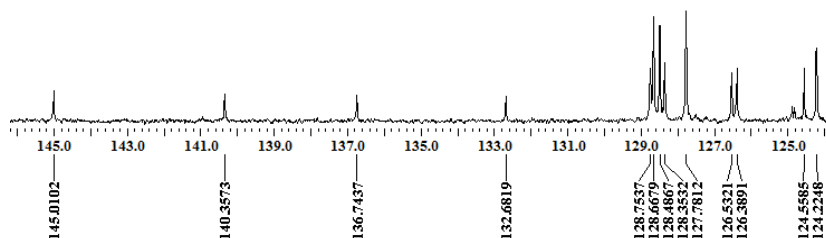

**HRMS:** Ethyl 2-(2-(4-bromophenyl)-3-phenyl-1,2-dihydroisoquinolin-1-yl)-2-fluoroacetate (**3zb**)

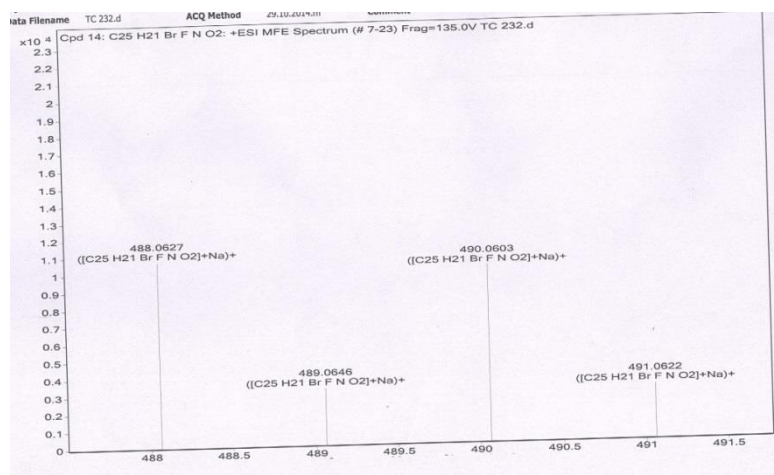

<sup>1</sup>H NMR in CDCl<sub>3</sub>

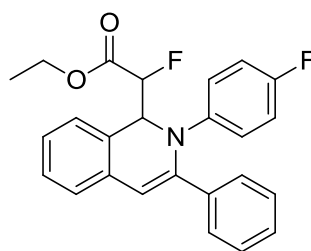

Ethyl 2-fluoro-2-(2-(4-fluorophenyl)-3-phenyl-1,2-dihydroisoquinolin-1-yl)acetate (**3zc**)

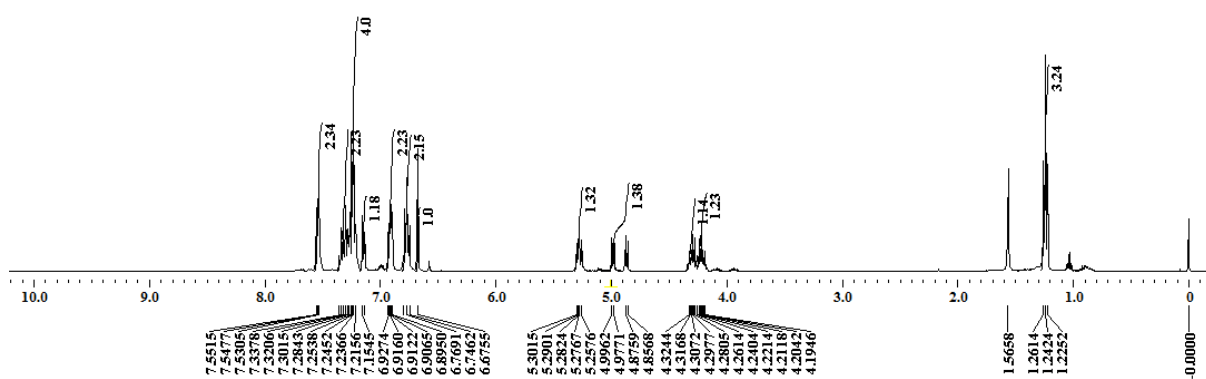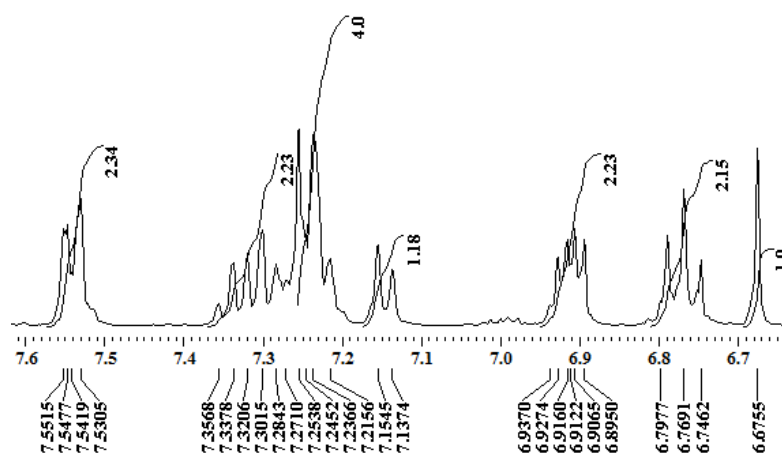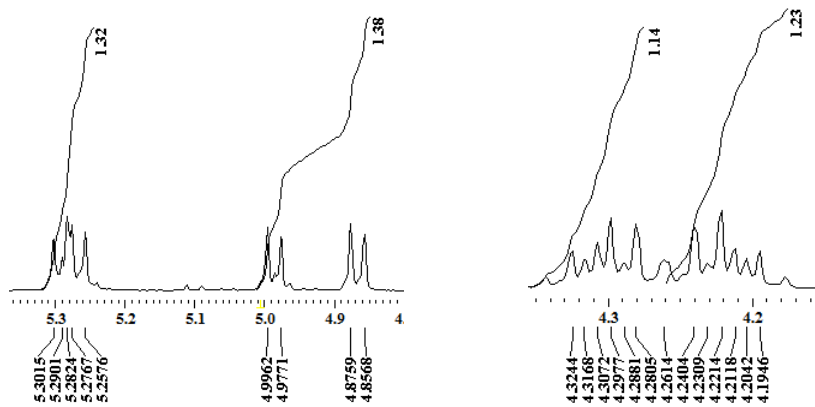

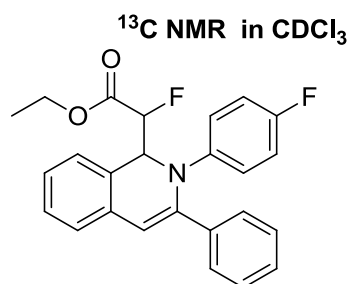

Ethyl 2-fluoro-2-(2-(4-fluorophenyl)-3-phenyl-1,2-dihydroisoquinolin-1-yl)acetate (**3zc**)

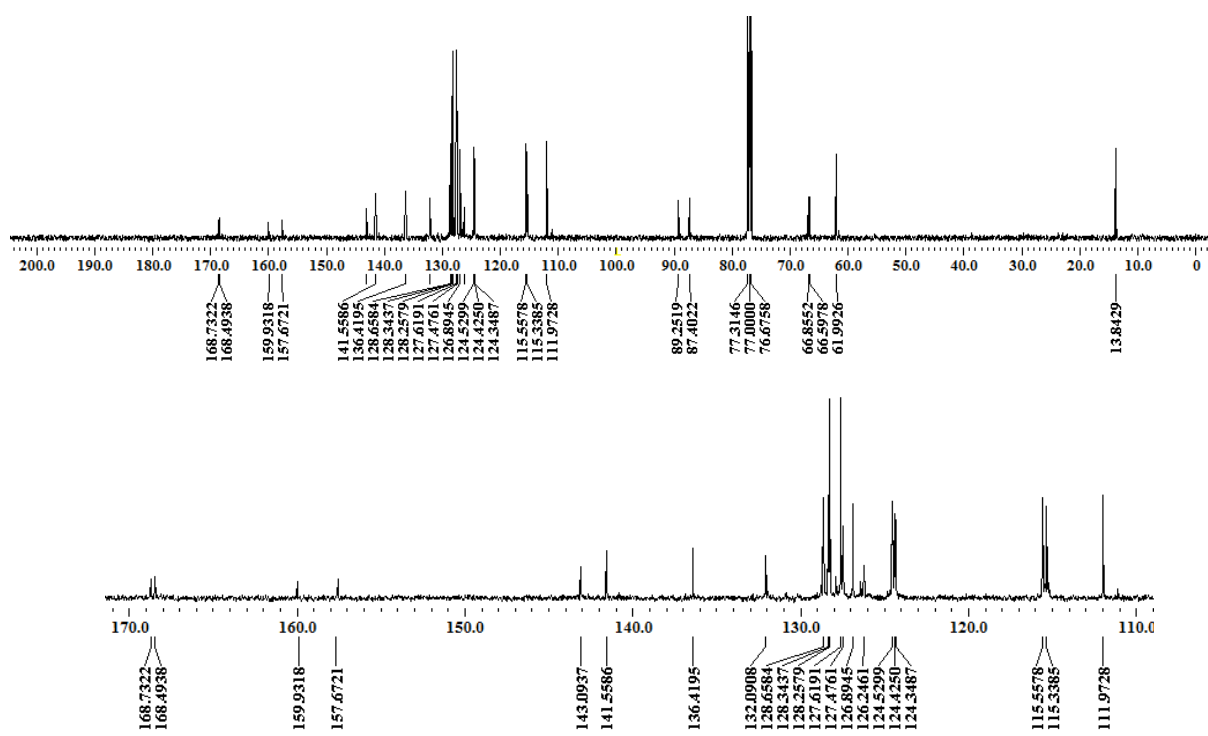

HRMS: Ethyl 2-fluoro-2-(2-(4-fluorophenyl)-3-phenyl-1,2-dihydroisoquinolin-1-yl)acetate (**3zc**)

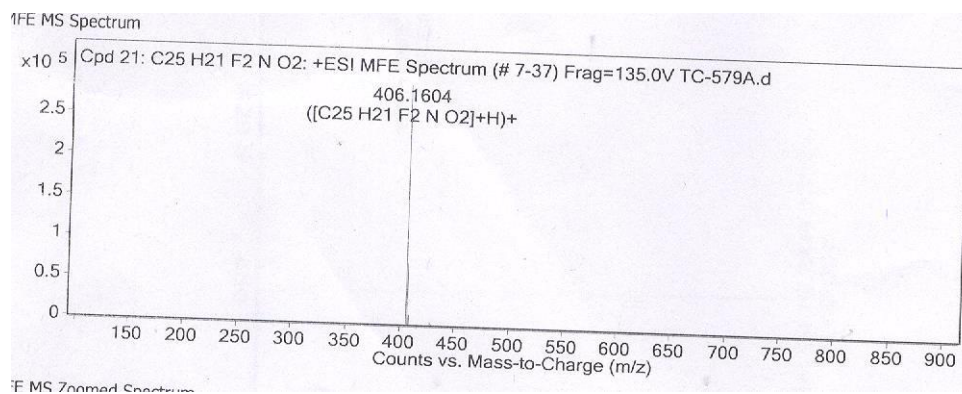

<sup>1</sup>H NMR in CD<sub>3</sub>CN

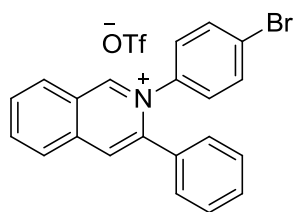

2-(4-Bromophenyl)-3-phenylisoquinolin-2-ium (**4a**)

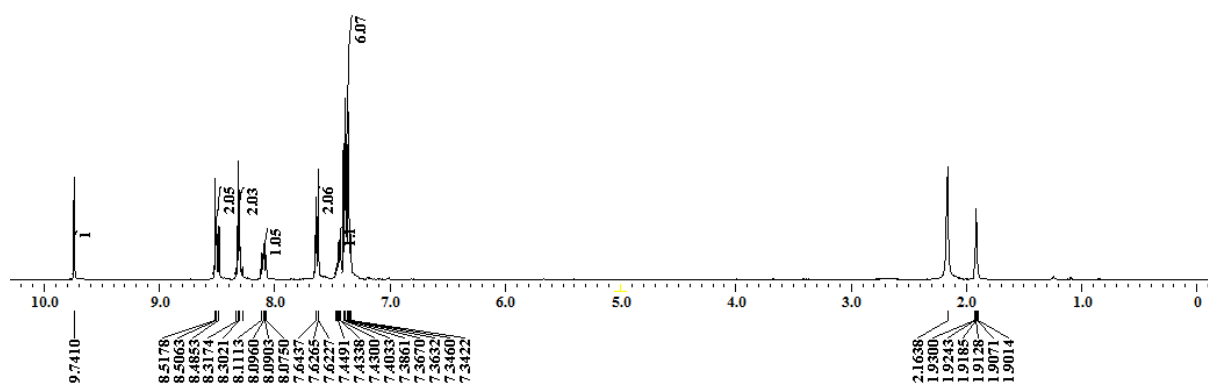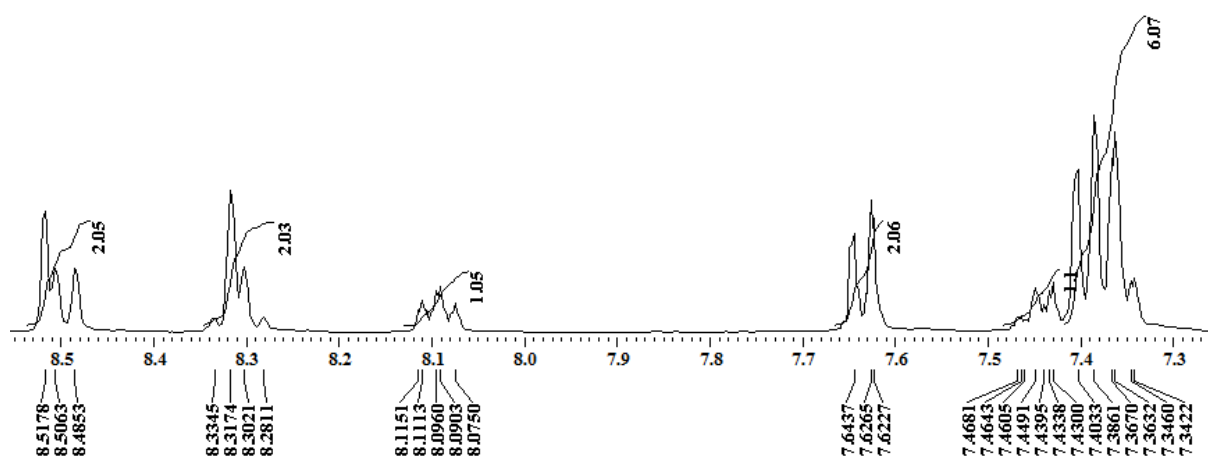

<sup>13</sup>C NMR in CD<sub>3</sub>CN

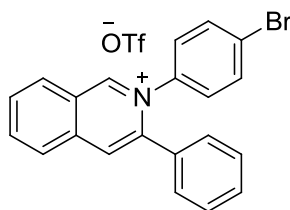

2-(4-Bromophenyl)-3-phenylisoquinolin-2-ium (4a)

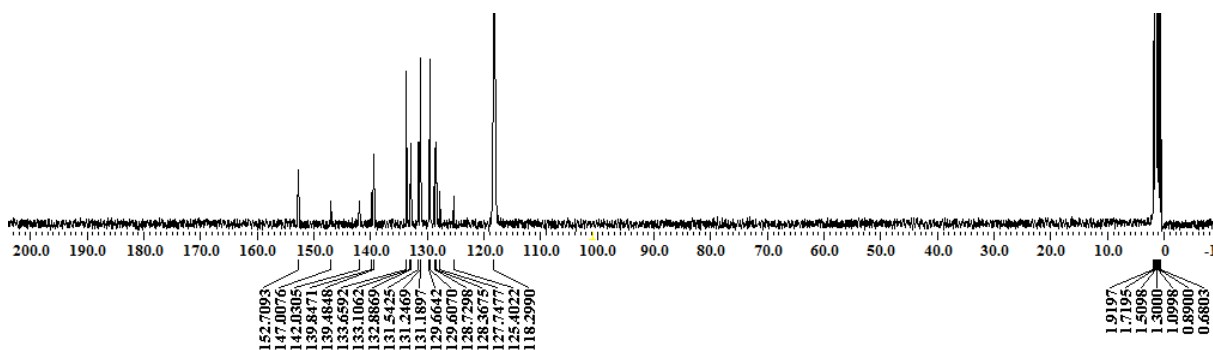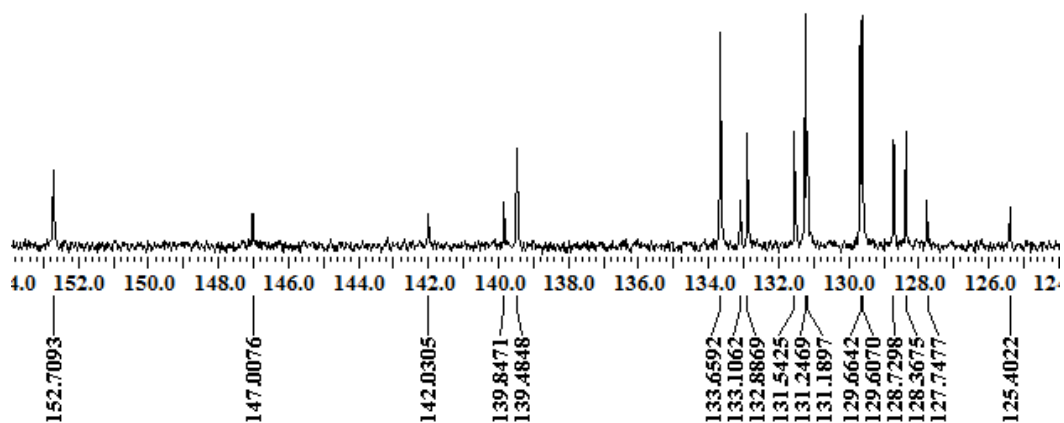

HRMS: 2-(4-Bromophenyl)-3-phenylisoquinolin-2-ium (4a)

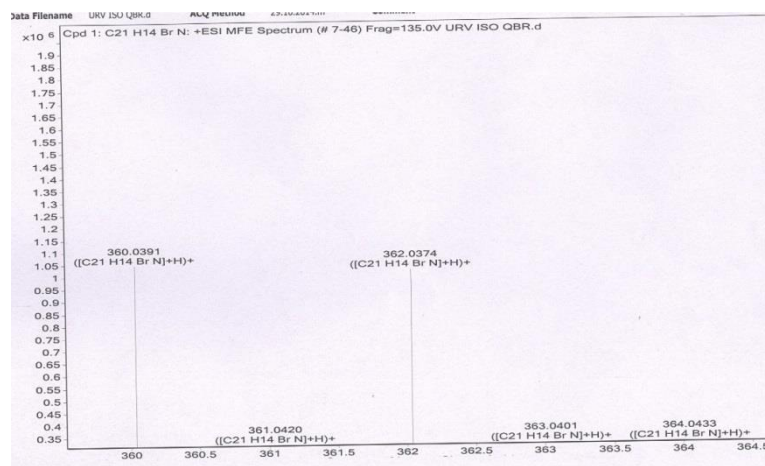

<sup>1</sup>H NMR in CD<sub>3</sub>CN

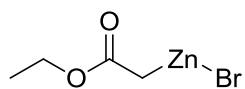

(2-Ethoxy-2-oxoethyl)zinc(II) bromide (5)

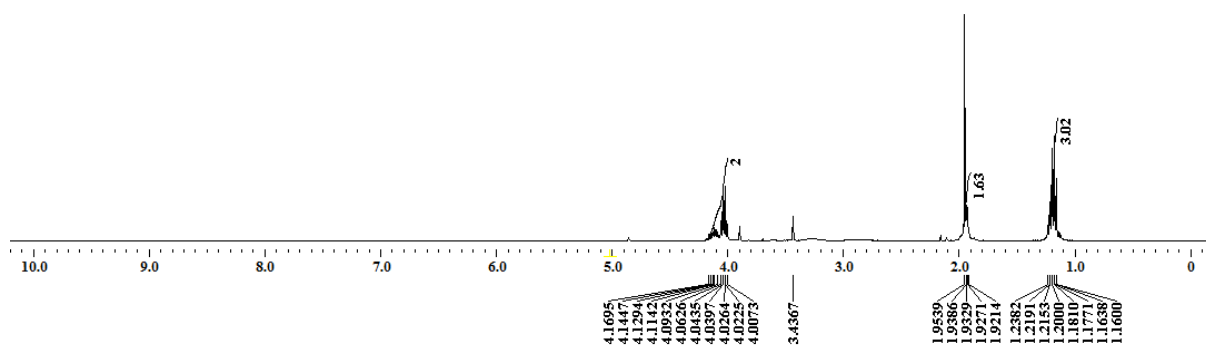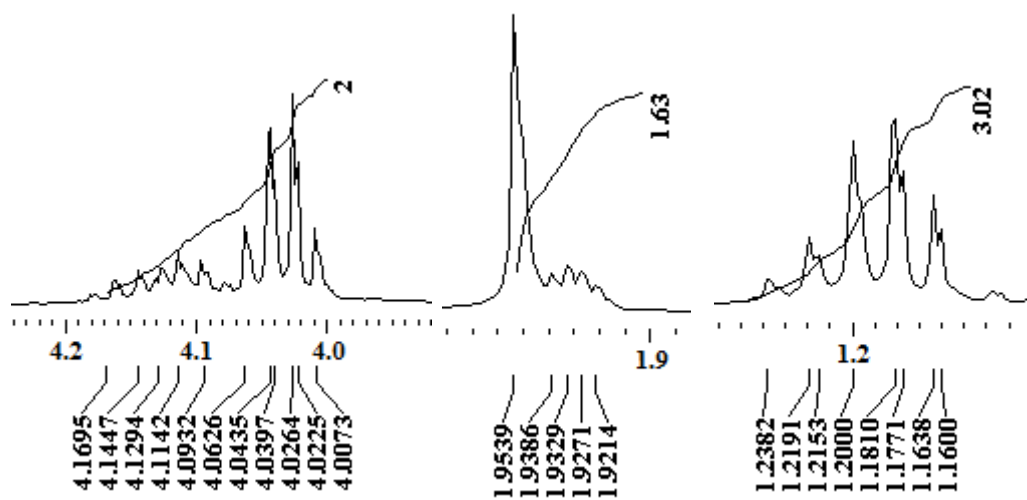

<sup>13</sup>C NMR in CD<sub>3</sub>CN

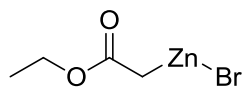

(2-Ethoxy-2-oxoethyl)zinc(II) bromide (**5**)

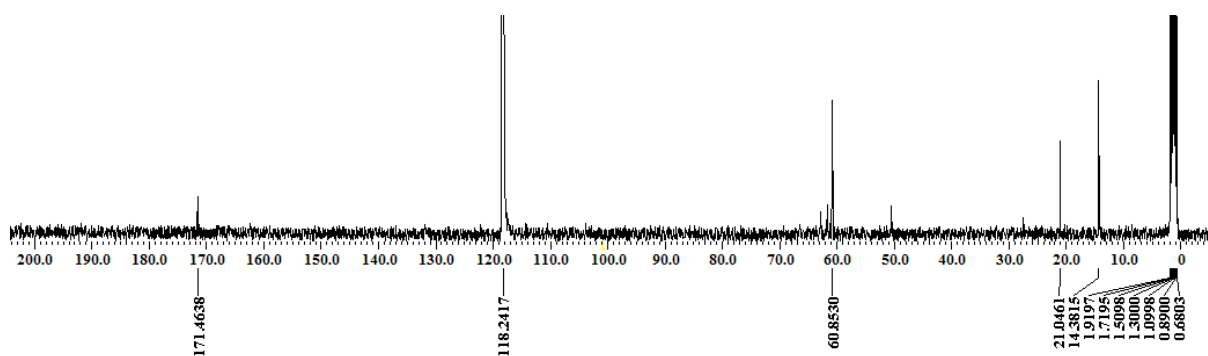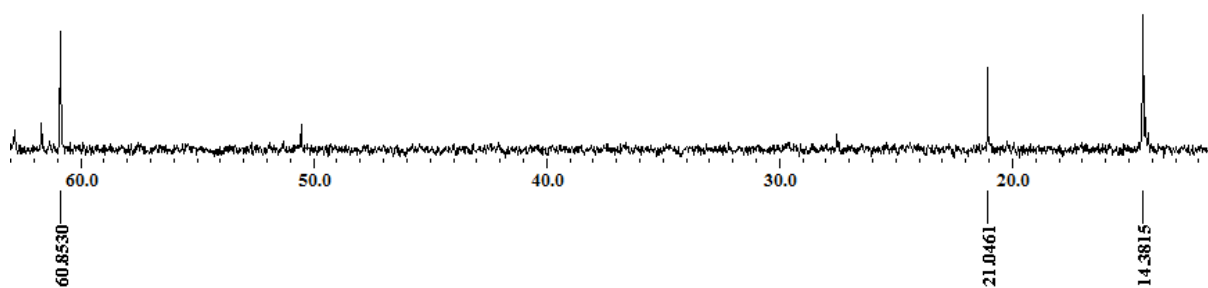



#### 4. Spectra of Mechanistic Experiments

<sup>1</sup>H NMR ( Scheme 4 equation c): The NMR given below is a mixture of **5** and **4b**. In this, **1a** was completely converted to isoquinolinium salt (**4b**), but as **5** was used in excess hence, unreacted **5** is in mixture and peak of **5** was also observed in reaction. The NMR was recorded without work up in CD<sub>3</sub>CN.

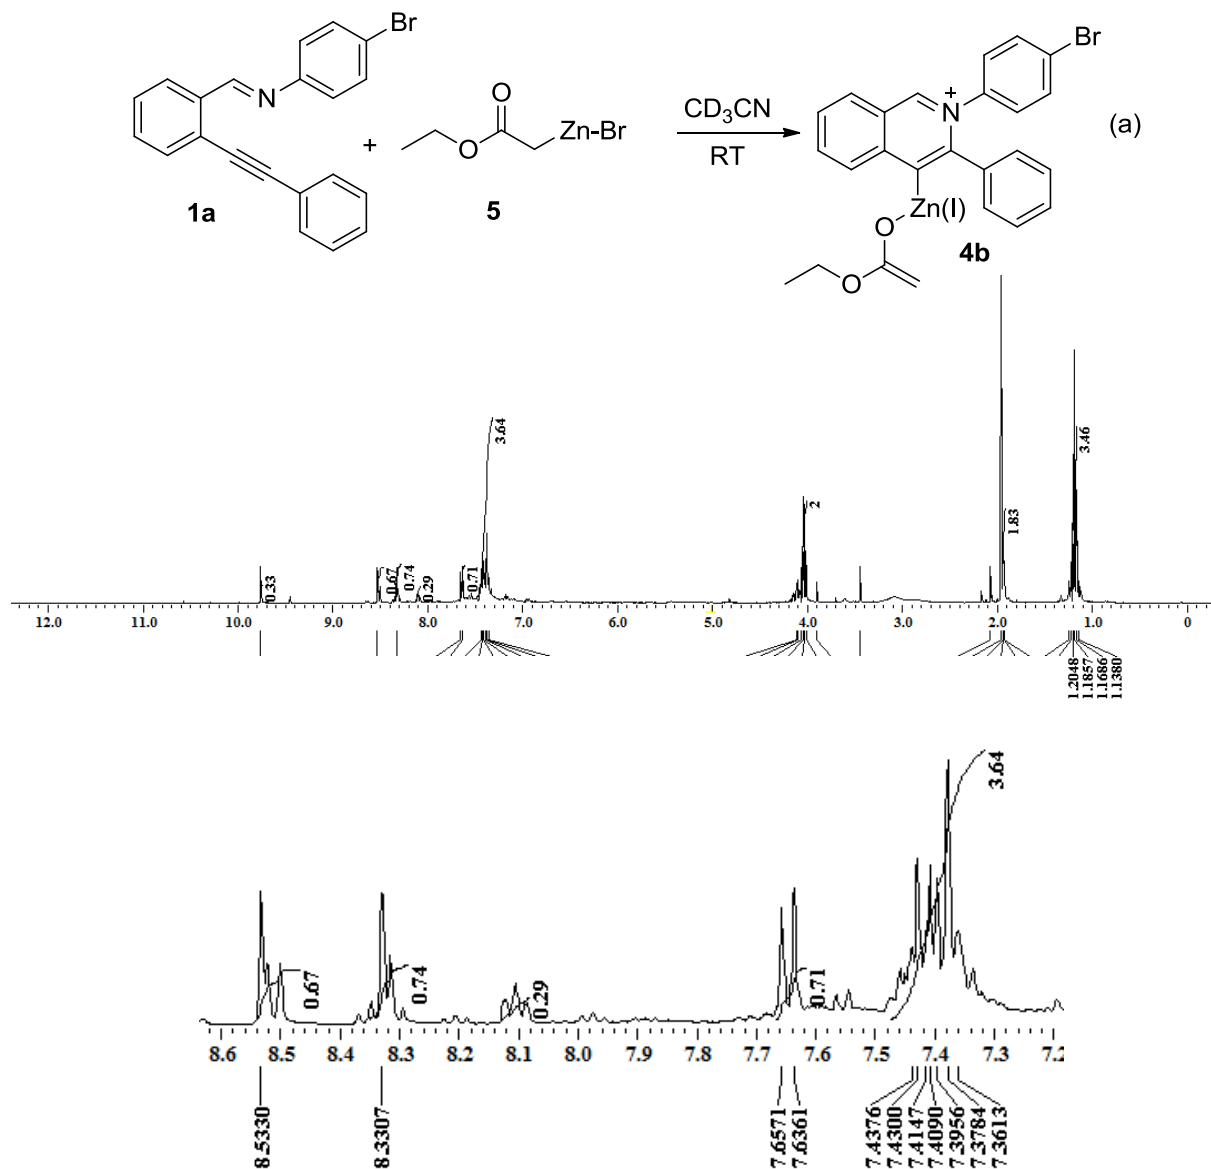

**<sup>13</sup>C NMR of (Scheme 4 equation c):** The NMR given below is a mixture of **5** and **4b**. **1a** was completely converted to isoquinolinium salt (**4b**), but as **5** was used in excess hence, unreacted **5** is in mixture and peak of **5** was also observed in reaction. The NMR was recorded without work up in CD<sub>3</sub>CN.

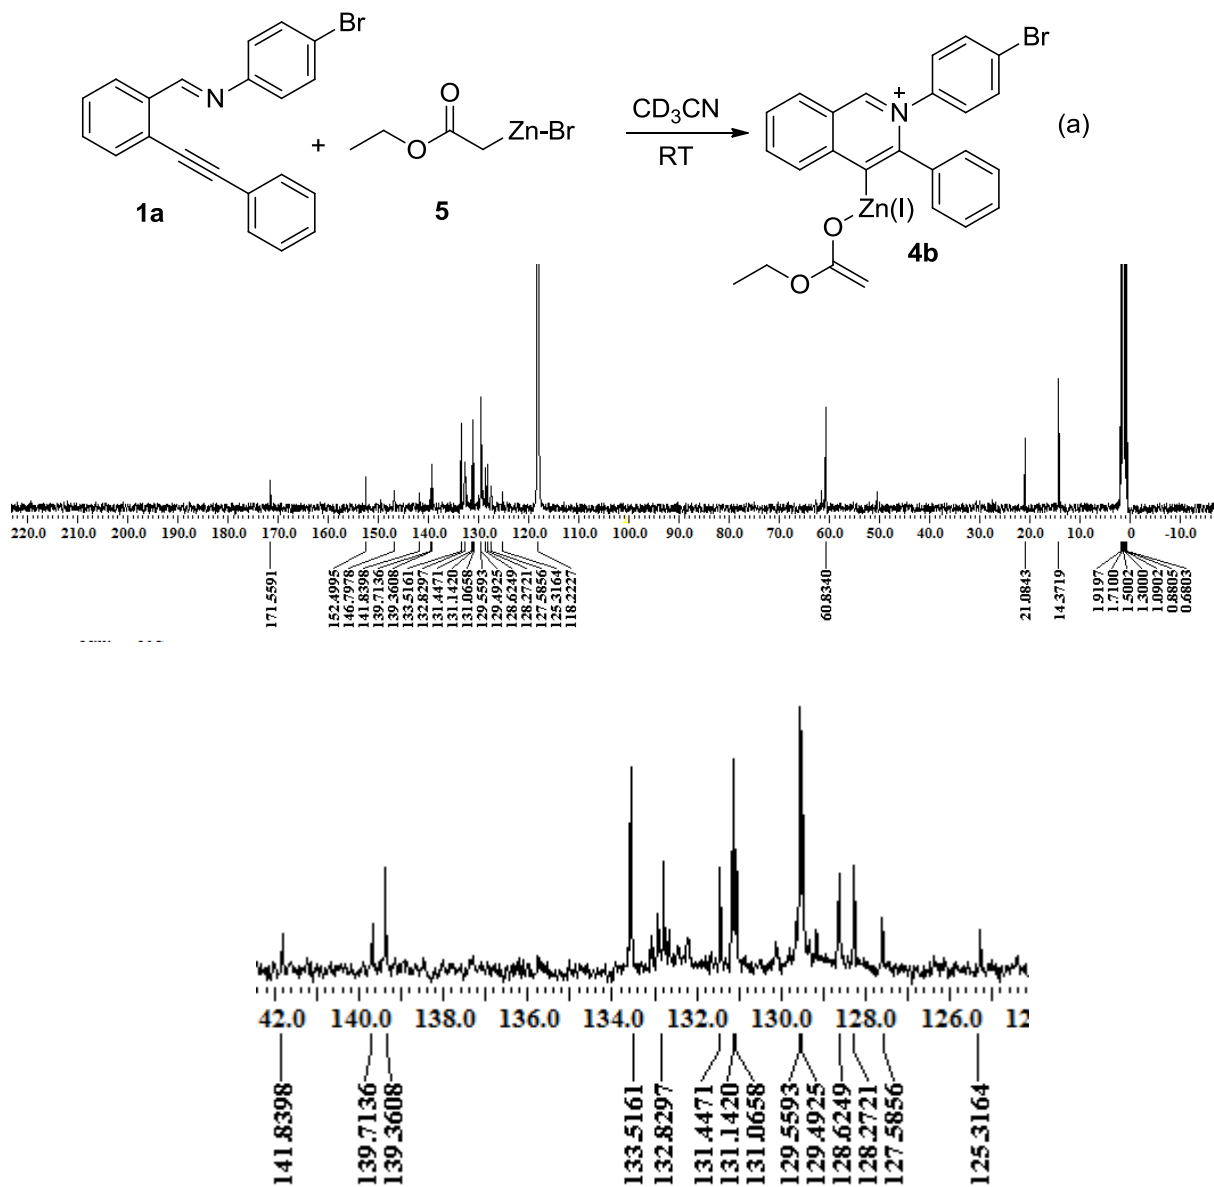

**Scheme 4 (eq. c): Comparison of spectra of  $^{13}\text{C}$  NMR in  $\text{CD}_3\text{CN}$  of reaction mixture and constituents separately**

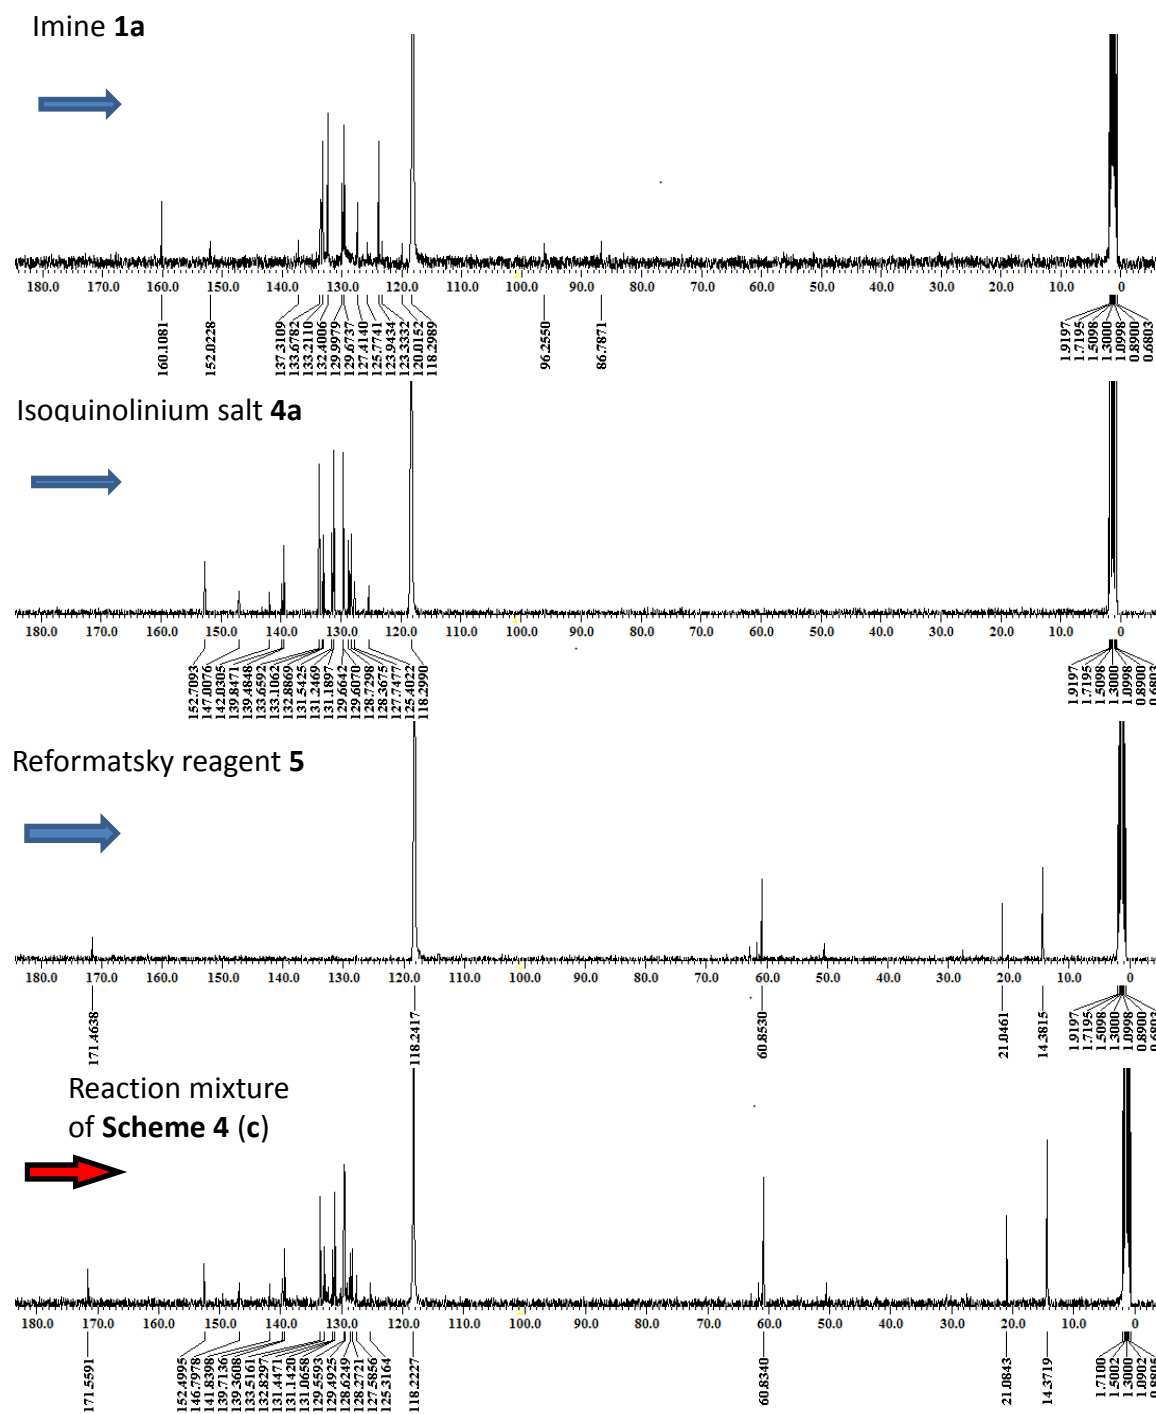

| <b>Imine peaks<br/>(1a) (ppm)</b> | <b>Isoquinolinium<br/>(4a) peaks (ppm)</b> | <b>Reformatsky peaks<br/>(5) (ppm)</b> | <b>Reaction Mixture<br/>(Scheme 4eq. c) peaks<br/>(ppm)</b> |
|-----------------------------------|--------------------------------------------|----------------------------------------|-------------------------------------------------------------|
| 160.108                           | ---                                        | --                                     | ---                                                         |
| ---                               | 152.709                                    | ---                                    | 152.4995                                                    |
| 152.022                           | ---                                        | ---                                    | ---                                                         |
| ---                               | 147.007                                    | ---                                    | 146.797                                                     |
| ---                               | 142.030                                    | ---                                    | 141.839                                                     |
| ---                               | 139.849                                    | ---                                    | 139.713                                                     |
| ---                               | 139.484                                    | ---                                    | 139.360                                                     |
| ---                               | 133.659                                    | ---                                    | 133.516                                                     |
| ---                               | 132.886                                    | ---                                    | 132.829                                                     |
| ---                               | 131.542                                    | ---                                    | 131.447                                                     |
| ---                               | 131.246                                    | ---                                    | 131.142                                                     |
| ---                               | 131.189                                    | ---                                    | 131.065                                                     |
| 129.997                           | 129.664                                    | ---                                    | 129.559                                                     |
| 129.673                           | 129.607                                    | ---                                    | 129.492                                                     |
| ---                               | 128.729                                    | ---                                    | 128.624                                                     |
| ---                               | 128.367                                    | ---                                    | 128.272                                                     |
| 127.414                           | 127.747                                    | ---                                    | 127.585                                                     |
| 125.774                           | 125.402                                    | ---                                    | 125.316                                                     |
| 123.994                           | ---                                        | ---                                    | ---                                                         |
| 120.015                           | ---                                        | ---                                    | ---                                                         |
| ---                               | ---                                        | 171.463                                | 171.559                                                     |
| ---                               | ---                                        | 60.853                                 | 60.834                                                      |
| ---                               | ---                                        | 21.046                                 | 21.0843                                                     |
| ---                               | ---                                        | 14.381                                 | 14.371                                                      |

$^1\text{H}$  NMR in  $\text{CDCl}_3$

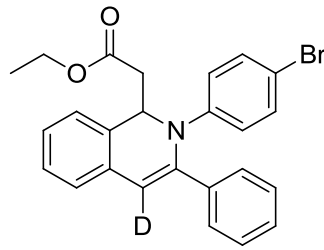

Ethyl 2-(2-(4-bromophenyl)-3-phenyl-1,2-dihydroisoquinolin-1-yl-4-d) acetate (**3ab**)

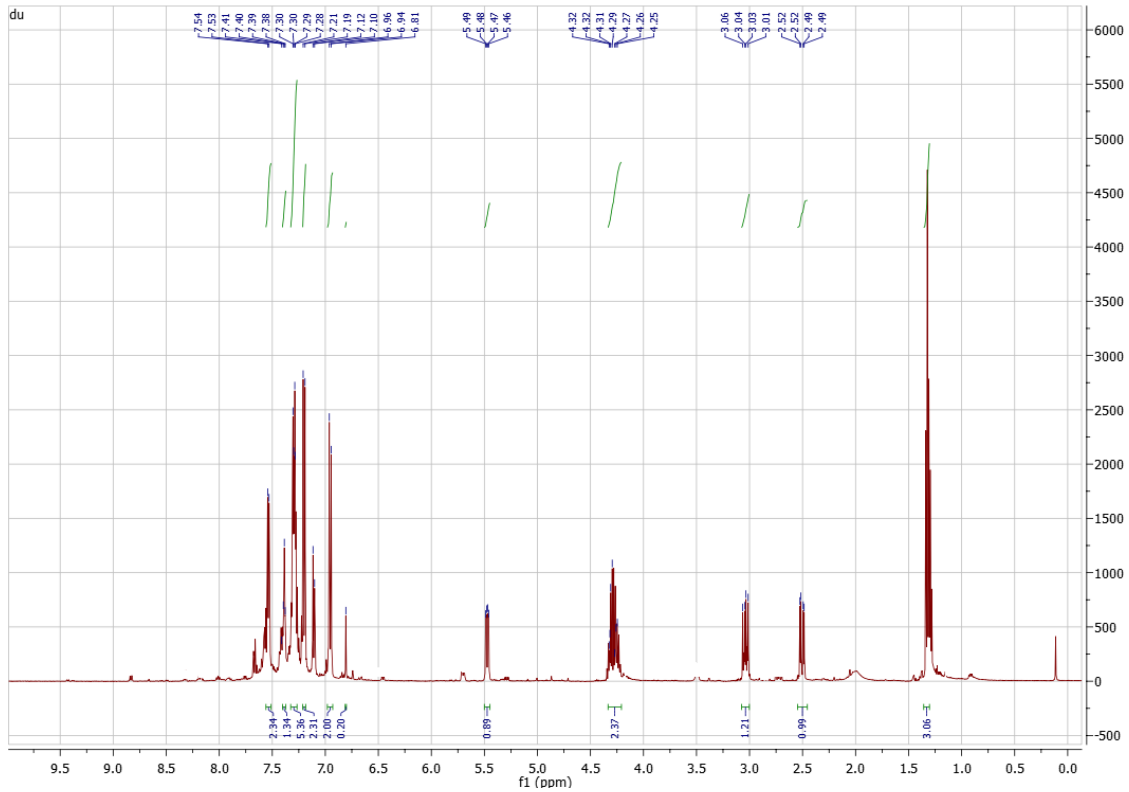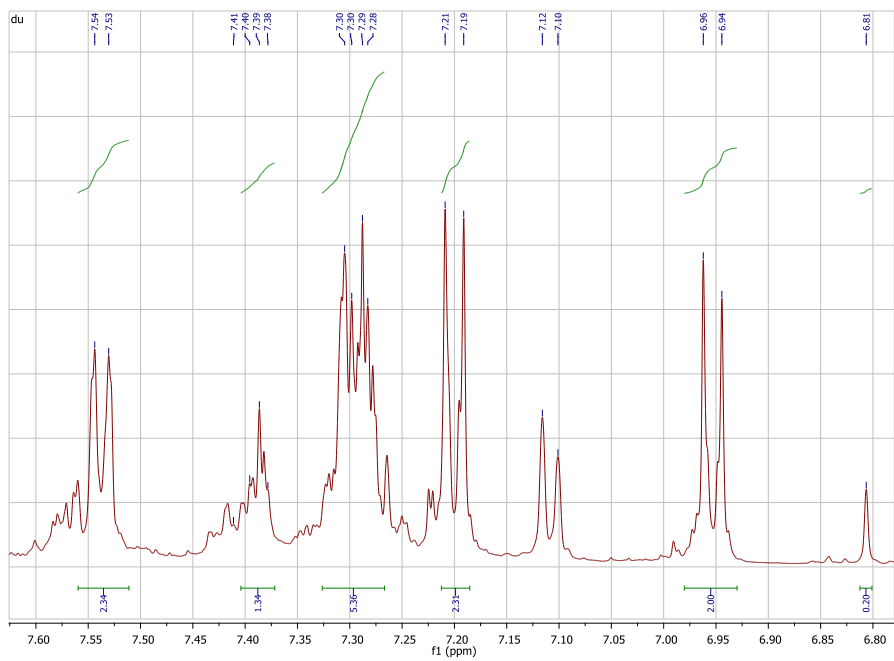

**HRMS: ethyl 2-(2-(4-bromophenyl)-3-phenyl-1,2-dihydroisoquinolin-1-yl-4-d) acetate (3ab)**

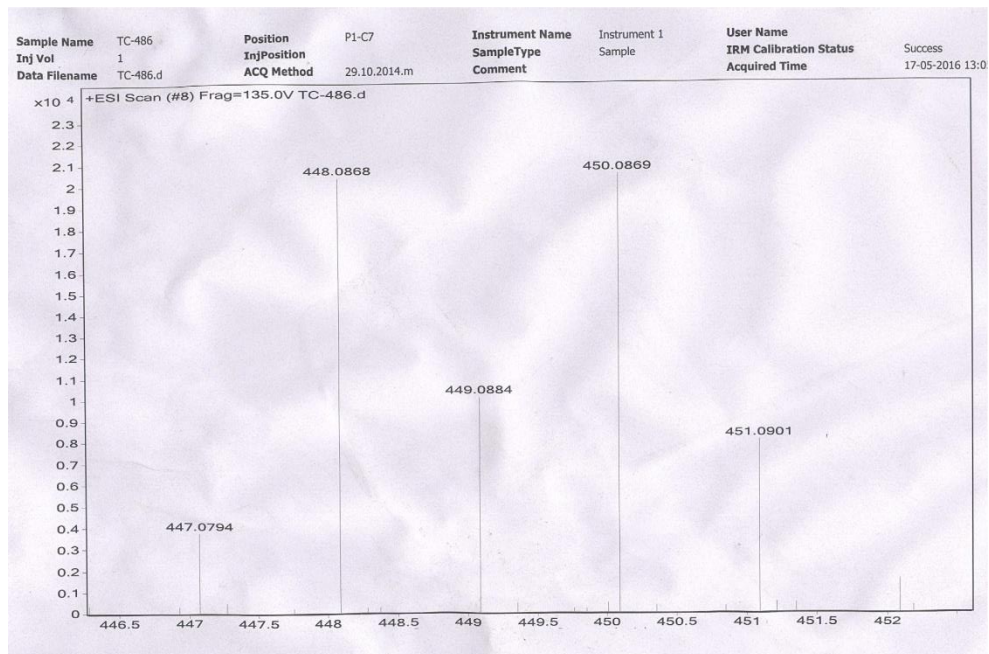

Supplement: c6ob01790h1.pdf [file c6ob01790h1.pdf]
